# Supplementary material for: An efficient pyrroline annulation of glycine imine with enones
Source: Royal Society of Chemistry journal article supplement (doi:10.1039/c2ra20697h), 2012-01-01
Supplement: c2ra20697h.pdf [file c2ra20697h.pdf]

## Supporting Information

### An Efficient Pyrroline Annulation of Glycine Imine with Enones

Yu Zhang, Ling Pan,\* Xianxiu Xu, Qun Liu\*

Department of Chemistry, Northeast Normal University, Changchun 130024, China

Email: [panl948@nenu.edu.cn](mailto:panl948@nenu.edu.cn) and [liuqun@nenu.edu.cn](mailto:liuqun@nenu.edu.cn)

#### Table of contents

|                                                                                                   |    |
|---------------------------------------------------------------------------------------------------|----|
| I. General information .....                                                                      | 2  |
| II. Synthetic procedures and analytical data of <b>3</b> , <b>4</b> , <b>7</b> and <b>9</b> ..... | 2  |
| III. Determination on the ratio of <i>trans/cis</i> configuration of <b>3</b> .....               | 21 |
| IV. Copies of <sup>1</sup> H NMR and <sup>13</sup> C NMR spectra.....                             | 22 |
| V. Crystal data and ORTEP drawing of compound <i>cis</i> - <b>3d</b> .....                        | 66 |

## I. General information

All reagents were purchased from commercial sources and used without further purification, unless otherwise indicated. All reactions were monitored by TLC, which was performed on precoated aluminum sheets of silica gel 60 (F254). The products were purified by column chromatography on flash silica gel (300–400 mesh). Melting points were uncorrected. The  $^1\text{H}$  NMR and  $^{13}\text{C}$  NMR spectra were determined on a Varian 500 MHz and 125 MHz, respectively, with TMS as the internal standard. All shifts are given in ppm. IR spectra (KBr) were recorded on a Magna-560 FTIR spectrophotometer in the range of 400–4000  $\text{cm}^{-1}$ . High-resolution mass spectra (HRMS) were obtained using a Bruker microTOF II focus spectrometer (ESI).

## II. Synthetic procedures and analytical data of **3**, **4**, **7** and **9**

General procedure (**3a** as an example): To the mixture of enone **1a** (242 mg, 1.0 mmol) and azomethine ylide **2a** (253 mg, 1.2 mmol) in THF (5 mL) was added DBU (0.2 mmol) in one portion at room temperature. After **1a** was consumed as indicated by TLC, the resulting mixture was poured into ice brine (30 mL) under stirring. The precipitates were collected by filtration, washed with water (10 mL  $\times$  3), and dried in vacuo. The crude product was purified by flash column chromatography (silica gel, petroleum ether: EtOAc = 10 : 1, V/V) to give **3a** (289 mg, 92%). The *trans/cis* configuration of **3** was calculated on the integration of the signal at 4.1–5.4 ppm in  $^1\text{H}$  NMR spectra of the diastereomeric mixture based on *cis*-**3d** (For details, see Part III).

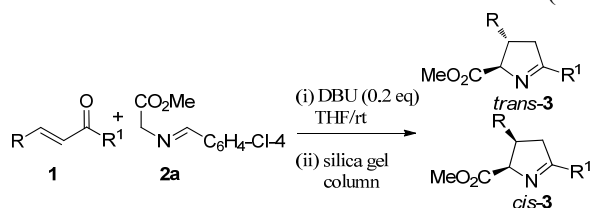

**3a**, *trans:cis* = 1.5:1.0

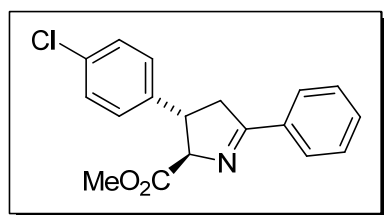

*trans*-**3a**: yellowish crystals, m.p. 107–109 °C

$^1\text{H}$  NMR ( $\text{CDCl}_3$ , 500 MHz)  $\delta$  3.10 (dd,  $J = 17.5, 7.0$  Hz, 1H), 3.63 (dd,  $J = 17.5, 9.5$  Hz, 1H), 3.79 (s, 3H,  $\text{OCH}_3$ ), 3.86 (m, 1H), 4.89 (d,  $J = 6.0$  Hz, 1H), 7.16 (d,  $J = 8.5$  Hz, 2H), 7.27 (d,  $J = 8.5$  Hz, 2H), 7.40–7.48 (m, 3H), 7.90 (d,  $J = 8.0$  Hz, 2H).

$^{13}\text{C}$  NMR ( $\text{CDCl}_3$ , 125 MHz)  $\delta$  44.4, 45.7, 52.4, 82.3, 128.1, 128.4, 128.5, 128.9, 131.3, 132.5, 133.4, 141.5, 172.3, 174.7.

IR (KBr,  $\text{cm}^{-1}$ ): 3061, 2957, 2842, 1733, 1690, 1343.

HRMS (ESI-TOF) Calcd for  $\text{C}_{18}\text{H}_{17}\text{ClNO}_2^+$  ( $[\text{M}+\text{H}]^+$ ) 314.0942. Found 314.0916.

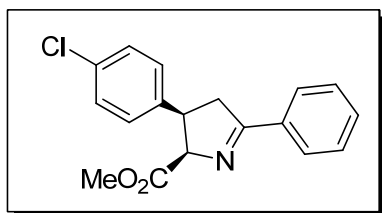

*cis*-**3a**: yellowish viscous oil

$^1\text{H}$  NMR ( $\text{CDCl}_3$ , 500 MHz)  $\delta$  3.34 (s, 3H,  $\text{OCH}_3$ ), 3.40 (m, 2H), 3.99 (m, 1H), 5.23 (d,  $J = 8.5$  Hz, 1H), 7.10 (d,  $J = 8.5$  Hz, 2H), 7.23 (d,  $J = 8.5$  Hz, 2H), 7.44–7.52 (m, 3H), 7.95 (d,  $J = 8.5$  Hz, 2H).

$^{13}\text{C}$  NMR ( $\text{CDCl}_3$ , 125 MHz)  $\delta$  42.0, 45.8, 51.4, 79.1, 128.0, 128.3, 128.5, 128.9, 131.2, 132.7, 133.4, 138.3, 170.5, 176.0.

IR (KBr,  $\text{cm}^{-1}$ ): 3061, 2951, 2845, 1739, 1684, 1344.

HRMS (ESI-TOF) Calcd for  $\text{C}_{18}\text{H}_{17}\text{ClNO}_2^+$  ( $[\text{M}+\text{H}]^+$ ) 314.0942. Found 314.0916.

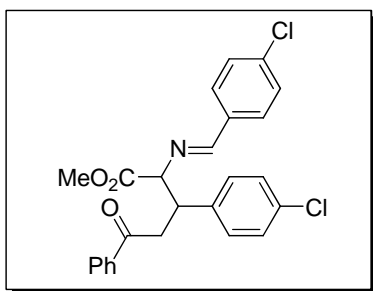

**4a**: yellowish viscous oil

$^1\text{H}$  NMR ( $\text{CDCl}_3$ , 500 MHz)  $\delta$  3.45–3.50 (m, 1H), 3.64 (s, 3H,  $\text{OCH}_3$ ), 4.23 (m, 2H), 7.17–7.22 (m, 4H), 7.39–7.44 (m, 4H), 7.53 (t,  $J = 7.5$  Hz, 1H), 7.69 (d,  $J = 8.5$  Hz, 2H), 7.90 (d,  $J = 7.5$  Hz, 2H), 8.07 (s, 1H).

IR (KBr,  $\text{cm}^{-1}$ ): 3059, 3027, 2951, 1735, 1686, 1349.

HRMS (ESI-TOF) Calcd for  $\text{C}_{25}\text{H}_{22}\text{ClNO}_3^+$  ( $[\text{M}+\text{H}]^+$ ) 454.0971. Found 454.0977.

**3b**, *trans*:*cis* = 2.4:1.0

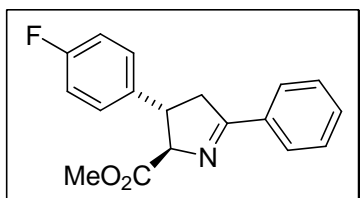

*trans*-**3b**: yellowish viscous oil

$^1\text{H}$  NMR ( $\text{CDCl}_3$ , 500 MHz)  $\delta$  3.12 (dd,  $J = 17.5, 6.5$  Hz, 1H), 3.65 (dd,  $J = 17.5, 9.5$  Hz, 1H), 3.78 (s, 3H,  $\text{OCH}_3$ ), 3.88 (m, 1H), 4.90 (d,  $J = 6.0$  Hz, 1H), 7.00 (m, 2H), 7.19 (m, 2H), 7.41–7.49 (m, 3H), 7.91 (d,  $J = 7.5$  Hz, 2H).

$^{13}\text{C}$  NMR ( $\text{CDCl}_3$ , 125 MHz)  $\delta$  44.7, 45.6, 52.4, 82.6, 115.7(d), 128.1, 128.4(d), 128.5, 131.3, 133.4, 138.8 (d), 161.7(d), 172.4, 174.9.

IR (KBr,  $\text{cm}^{-1}$ ): 3060, 2952, 2846, 1740, 1684, 1345.

HRMS (ESI-TOF) Calcd for  $\text{C}_{18}\text{H}_{17}\text{FNO}_2^+$  ( $[\text{M}+\text{H}]^+$ ) 298.1238. Found 298.1247.

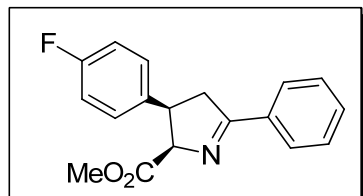

*cis*-**3b**: yellowish crystals, m.p. 85–87 °C

$^1\text{H}$  NMR ( $\text{CDCl}_3$ , 500 MHz)  $\delta$  3.33 (s, 3H,  $\text{OCH}_3$ ), 3.39 (m, 2H), 3.99 (m, 1H), 5.22 (d,  $J = 8.5$  Hz, 1H), 6.95 (m, 2H), 7.13 (m, 2H), 7.44–7.50 (m, 3H), 7.96 (d,  $J = 8.0$  Hz, 2H).

$^{13}\text{C}$  NMR ( $\text{CDCl}_3$ , 125 MHz)  $\delta$  42.2, 45.8, 51.4, 79.2, 115.1(d), 128.0, 128.5, 129.1(d), 131.3, 133.5, 135.5(d), 161.8(d), 170.7, 176.2.

IR (KBr,  $\text{cm}^{-1}$ ): 3072, 2947, 2837, 1747, 1621, 1355.

HRMS (ESI-TOF) Calcd for  $\text{C}_{18}\text{H}_{17}\text{FNO}_2^+$  ( $[\text{M}+\text{H}]^+$ ) 298.1238. Found 298.1247.

**3c**, *trans*:*cis* = 1.3:1.0

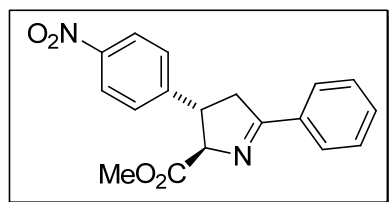

*trans*-**3c**: yellowish viscous oil

$^1\text{H}$  NMR ( $\text{CDCl}_3$ , 500 MHz)  $\delta$  3.18 (dd,  $J = 17.5, 6.5$  Hz, 1H), 3.73 (dd,  $J = 17.5, 9.5$  Hz, 1H), 3.81 (s, 3H,  $\text{OCH}_3$ ), 4.02–4.04 (m, 1H), 4.96 (d,  $J = 5.5$  Hz, 1H), 7.41–7.47 (m, 4H), 7.50 (d,  $J = 7.0$  Hz, 1H), 7.92 (d,  $J = 7.0$  Hz, 2H), 8.19 (d,  $J = 8.5$  Hz, 2H).

$^{13}\text{C}$  NMR ( $\text{CDCl}_3$ , 125 MHz)  $\delta$  44.5, 46.0, 52.7, 82.3, 124.2, 128.0, 128.1, 128.6, 131.5, 133.1, 147.0, 150.6, 171.9, 174.6.

IR (KBr,  $\text{cm}^{-1}$ ): 3077, 2953, 2850, 1739, 1604, 1346.

HRMS (ESI-TOF) Calcd for  $\text{C}_{18}\text{H}_{17}\text{N}_2\text{O}_4^+$  ( $[\text{M}+\text{H}]^+$ ) 325.1183. Found 325.1185.

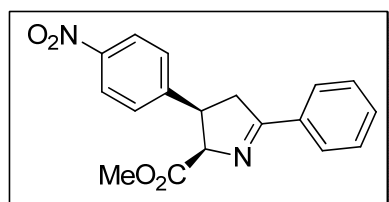

*cis*-**3c**: yellowish crystals, m.p. 118–120 °C

$^1\text{H}$  NMR ( $\text{CDCl}_3$ , 500 MHz)  $\delta$  3.34 (s, 3H,  $\text{OCH}_3$ ), 3.45 (dd,  $J = 17.5, 5.5$  Hz, 1H), 3.50 (dd,  $J = 17.5, 8.5$  Hz, 1H), 4.12 (m, 1H), 5.30 (d,  $J = 8.5$  Hz, 1H), 7.35 (d,  $J = 8.5$  Hz, 2H), 7.47 (t,  $J = 7.5$  Hz, 2H), 7.51 (d,  $J = 7.0$  Hz, 1H), 7.96 (d,  $J = 7.0$  Hz, 2H), 8.13 (d,  $J = 9.0$  Hz, 2H).

$^{13}\text{C}$  NMR ( $\text{CDCl}_3$ , 125 MHz)  $\delta$  42.1, 46.3, 51.7, 79.1, 123.6, 128.1, 128.5, 128.7, 131.6, 133.2, 147.0, 147.7, 170.3, 175.9.

IR (KBr,  $\text{cm}^{-1}$ ): 3054, 2950, 2842, 1743, 1673, 1346.

HRMS (ESI-TOF) Calcd for  $\text{C}_{18}\text{H}_{17}\text{N}_2\text{O}_4^+$  ( $[\text{M}+\text{H}]^+$ ) 325.1183. Found 325.1185.

**3d**, *trans:cis* = 1.4:1.0

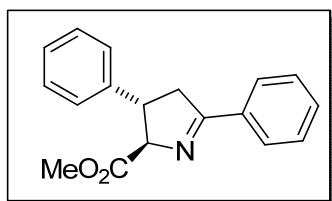

*trans*-**3d**: yellowish viscous oil

$^1\text{H}$  NMR ( $\text{CDCl}_3$ , 500 MHz)  $\delta$  3.15 (dd,  $J = 17.5, 7.0$  Hz, 1H), 3.65 (dd,  $J = 17.5, 9.5$  Hz, 1H), 3.77 (s, 3H,  $\text{OCH}_3$ ), 3.87–3.90 (m, 1H), 4.96 (d,  $J = 6.0$  Hz, 1H), 7.22–7.24 (m, 3H), 7.31 (t,  $J = 7.5$  Hz, 2H), 7.40–7.47 (m, 3H), 7.91 (d,  $J = 7.0$  Hz, 2H).

$^{13}\text{C}$  NMR ( $\text{CDCl}_3$ , 125 MHz)  $\delta$  44.5, 46.1, 52.2, 82.4, 126.7, 126.8, 128.0, 128.4, 128.7, 131.0, 133.4, 143.0, 172.4, 174.8.

IR (KBr,  $\text{cm}^{-1}$ ): 3061, 2951, 2844, 1740, 1614, 1343.

HRMS (ESI-TOF) Calcd for  $\text{C}_{18}\text{H}_{18}\text{NO}_2^+$  ( $[\text{M}+\text{H}]^+$ ) 280.1332. Found 280.1319.

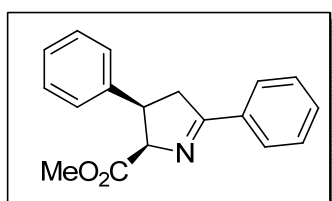

*cis*-**3d**: yellowish crystals, m.p. 106–108 °C

$^1\text{H}$  NMR ( $\text{CDCl}_3$ , 500 MHz)  $\delta$  3.28 (s, 3H,  $\text{OCH}_3$ ), 3.41–3.43 (m, 2H), 4.00 (m, 1H), 5.24 (d,  $J = 8.5$  Hz, 1H), 7.18 (d,  $J = 7.0$  Hz, 2H), 7.23 (d,  $J = 7.0$  Hz, 1H), 7.28 (t,  $J = 7.5$  Hz, 2H), 7.46–7.50 (m, 3H), 7.96 (d,  $J = 7.0$  Hz, 2H).

$^{13}\text{C}$  NMR ( $\text{CDCl}_3$ , 125 MHz)  $\delta$  41.9, 46.5, 51.3, 79.3, 127.0, 127.5, 128.0, 128.2, 128.5, 131.1, 133.6, 139.7, 170.7, 176.3.

IR (KBr,  $\text{cm}^{-1}$ ): 3062, 2921, 2852, 1740, 1677, 1346.

HRMS (ESI-TOF) Calcd for  $\text{C}_{18}\text{H}_{18}\text{NO}_2^+$  ( $[\text{M}+\text{H}]^+$ ) 280.1332. Found 280.1319.

**3e**, *trans:cis* = 1.6:1.0

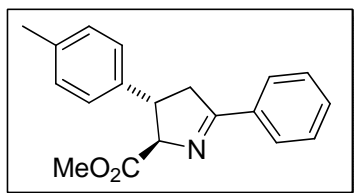

*trans*-**3e**: yellowish viscous oil

$^1\text{H}$  NMR ( $\text{CDCl}_3$ , 500 MHz)  $\delta$  2.33 (s, 3H,  $\text{CH}_3$ ), 3.13 (dd,  $J = 17.5, 6.5$  Hz, 1H), 3.63 (dd,  $J = 17.5, 10$  Hz, 1H), 3.78 (s, 3H,  $\text{OCH}_3$ ), 3.83–3.87 (m, 1H), 4.93 (d,  $J = 6.0$  Hz, 1H), 7.13 (s, 4H), 7.42–7.48 (m, 3H), 7.90 (d,  $J = 7.0$  Hz, 2H).

$^{13}\text{C}$  NMR ( $\text{CDCl}_3$ , 125 MHz)  $\delta$  21.0, 44.7, 46.0, 52.4, 82.6, 126.9, 128.1, 128.5, 129.5, 133.2, 133.6, 136.5, 140.1, 172.7, 175.1.

IR (KBr,  $\text{cm}^{-1}$ ): 3055, 2924, 2854, 1744, 1614, 1344.

HRMS (ESI-TOF) Calcd for  $\text{C}_{19}\text{H}_{20}\text{NO}_2^+$  ( $[\text{M}+\text{H}]^+$ ) 294.1489. Found 294.1490.

**3f**, *trans*:*cis* = 1.4:1.0

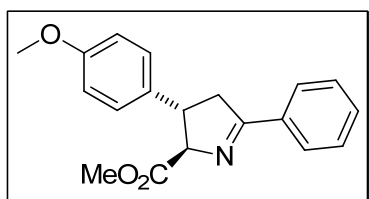

*trans*-**3f**: yellowish viscous oil

$^1\text{H}$  NMR ( $\text{CDCl}_3$ , 500 MHz)  $\delta$  3.10 (dd,  $J = 17.5, 7.5$  Hz, 1H), 3.62 (dd,  $J = 17.5, 9.5$  Hz, 1H), 3.76 (s, 3H), 3.82–3.86 (m, 1H), 4.90 (d,  $J = 6.5$  Hz, 1H), 6.84 (d,  $J = 8.5$  Hz, 2H), 7.14 (d,  $J = 8.5$  Hz, 2H), 7.40–7.46 (m, 3H), 7.89–7.91 (d,  $J = 7.5$  Hz, 2H).

$^{13}\text{C}$  NMR ( $\text{CDCl}_3$ , 125 MHz)  $\delta$  44.6, 45.6, 52.4, 55.2, 82.6, 114.2, 128.0, 128.1, 128.5, 131.2, 133.6, 135.0, 158.5, 172.7, 175.1.

IR (KBr,  $\text{cm}^{-1}$ ): 3001, 2952, 2838, 1740, 1613, 1345.

HRMS (ESI-TOF) Calcd for  $\text{C}_{19}\text{H}_{20}\text{NO}_3^+$  ( $[\text{M}+\text{H}]^+$ ) 310.1438. Found 310.1427.

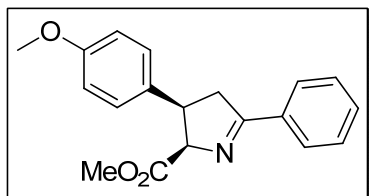

*cis*-**3f**: yellowish viscous oil

$^1\text{H}$  NMR ( $\text{CDCl}_3$ , 500 MHz)  $\delta$  3.33 (s, 3H), 3.39 (dd,  $J = 7.5, 1.5$  Hz, 2H), 3.76 (s, 3H), 3.95–3.99 (m, 1H), 5.19 (d,  $J = 9.0$  Hz, 1H), 6.79 (d,  $J = 8.5$  Hz, 2H), 7.09 (d,  $J = 8.5$  Hz, 2H), 7.44–7.49 (m, 3H), 7.95–7.97 (d,  $J = 9.0$  Hz, 2H).

$^{13}\text{C}$  NMR ( $\text{CDCl}_3$ , 125 MHz)  $\delta$  42.2, 45.8, 51.5, 55.2, 79.3, 113.6, 128.1, 128.5, 128.6, 131.2, 131.7, 133.7, 158.5, 170.9, 176.4.

IR (KBr,  $\text{cm}^{-1}$ ): 3059, 2951, 2837, 1739, 1681, 1435.

HRMS (ESI-TOF) Calcd for  $\text{C}_{19}\text{H}_{20}\text{NO}_3^+$  ( $[\text{M}+\text{H}]^+$ ) 310.1438. Found 310.1427.

**3g**, *trans:cis* = 1.3:1.0

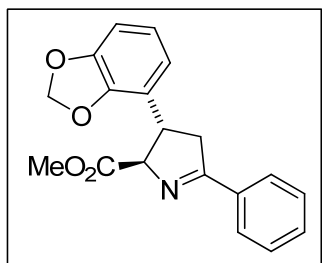

*trans*-**3g**: yellowish viscous oil

<sup>1</sup>H NMR ( $\text{CDCl}_3$ , 500 MHz)  $\delta$  3.12 (dd,  $J = 17.0, 6.5$  Hz, 1H), 3.60–3.66 (dd,  $J = 17.0, 9.5$  Hz, 1H), 3.79 (s, 3H), 3.80–3.84 (m, 1H), 4.89 (d,  $J = 6.0$  Hz, 1H), 5.93 (s, 2H), 6.69 (m, 2H), 6.75 (d,  $J = 7.5$  Hz, 1H), 7.43 (t,  $J = 7.5$  Hz, 2H), 7.47 (d,  $J = 7.0$  Hz, 1H), 7.90 (d,  $J = 7.5$  Hz, 2H).

<sup>13</sup>C NMR ( $\text{CDCl}_3$ , 125 MHz)  $\delta$  44.7, 46.1, 52.4, 82.6, 101.0, 107.1, 108.4, 120.1, 128.0, 128.5, 131.2, 133.5, 136.9, 146.4, 148.0, 172.5, 175.0.

IR (KBr,  $\text{cm}^{-1}$ ): 3060, 2952, 2900, 1733, 1615, 1341.

HRMS (ESI-TOF) Calcd for  $\text{C}_{19}\text{H}_{18}\text{NO}_4^+$  ( $[\text{M}+\text{H}]^+$ ) 324.1230. Found 324.1237.

**3h**, *trans:cis* = 1.2:1.0

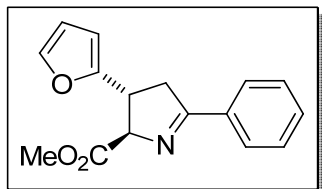

*trans*-**3h**: yellowish viscous oil

<sup>1</sup>H NMR ( $\text{CDCl}_3$ , 500 MHz)  $\delta$  3.33 (dd,  $J = 16.5, 9.0$  Hz, 1H), 3.42 (dd,  $J = 16.5, 8.0$  Hz, 1H), 3.49 (s, 3H), 4.05 (m, 1H), 5.19 (d,  $J = 8.5$  Hz, 1H), 6.13 (d,  $J = 3.0$  Hz, 1H), 6.29 (dd,  $J = 3.0, 2.0$  Hz, 1H), 7.31 (d,  $J = 2.0$  Hz, 1H), 7.48 (m, 3H), 7.92 (d,  $J = 8.0$  Hz, 2H).

<sup>13</sup>C NMR ( $\text{CDCl}_3$ , 125 MHz)  $\delta$  39.5, 41.3, 52.3, 79.2, 105.4, 110.2, 127.9, 128.3, 131.0, 133.3, 141.7, 154.6, 172.1, 174.5.

IR (KBr,  $\text{cm}^{-1}$ ): 3064, 2958, 2888, 1750, 1674, 1355.

HRMS (ESI-TOF) Calcd for  $\text{C}_{16}\text{H}_{16}\text{NO}_3^+$  ( $[\text{M}+\text{H}]^+$ ) 270.1125. Found 270.1136.

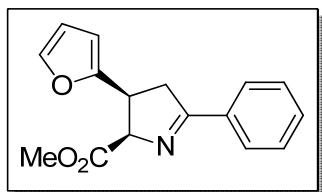

*cis-3h*: yellowish crystals, m.p. 101–103 °C

<sup>1</sup>H NMR (CDCl<sub>3</sub>, 500 MHz) δ 3.25 (dd, *J* = 17.0, 7.0 Hz, 1H), 3.54 (dd, *J* = 17.0, 9.5 Hz, 1H), 3.80 (s, 3H), 3.99 (m, 1H), 5.00 (d, *J* = 6.5 Hz, 1H), 6.14 (d, *J* = 3.0 Hz, 1H), 6.30 (dd, *J* = 3.0, 2.0 Hz, 1H), 7.34 (d, *J* = 2.0 Hz, 1H), 7.40–7.46 (m, 3H), 7.88 (d, *J* = 8.0 Hz, 2H).

<sup>13</sup>C NMR (CDCl<sub>3</sub>, 125 MHz) δ 39.8, 40.3, 51.9, 77.4, 106.3, 110.2, 128.0, 128.5, 131.2, 133.5, 141.7, 152.8, 170.5, 176.1.

IR (KBr, cm<sup>-1</sup>): 3063, 2956, 2873, 1740, 1615, 1351.

HRMS (ESI-TOF) Calcd for C<sub>16</sub>H<sub>16</sub>NO<sub>3</sub><sup>+</sup> ([M+H]<sup>+</sup>) 270.1125. Found 270.1136.

**3i**, *trans:cis* = 1.1:1.0

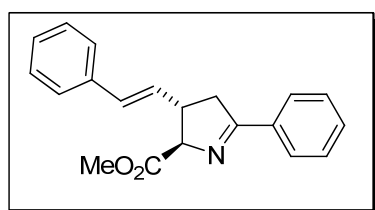

*trans-3i*: yellowish viscous oil

<sup>1</sup>H NMR (CDCl<sub>3</sub>, 500 MHz) δ 2.93 (dd, *J* = 16.5, 7.0 Hz, 1H), 3.43 (dd, *J* = 16.5, 9.0 Hz, 1H), 3.48 (m, 1H), 3.79 (s, 3H), 4.71 (d, *J* = 6.0 Hz, 1H), 6.24 (dd, *J* = 15.5, 7.5 Hz, 1H), 6.52 (d, *J* = 15.5 Hz, 1H), 7.21 (t, *J* = 7.5 Hz, 1H), 7.29 (t, *J* = 7.5 Hz, 2H), 7.35 (d, *J* = 7.5 Hz, 2H), 7.39–7.46 (m, 3H), 7.88 (d, *J* = 7.5 Hz, 2H).

<sup>13</sup>C NMR (CDCl<sub>3</sub>, 125 MHz) δ 42.3, 45.0, 52.4, 79.9, 126.2, 127.6, 128.0, 128.5, 128.6, 130.1, 131.2, 131.4, 133.6, 136.7, 172.5, 175.2.

IR (KBr, cm<sup>-1</sup>): 3058, 2924, 2854, 1743, 1650, 1344.

HRMS (ESI-TOF) Calcd for C<sub>20</sub>H<sub>20</sub>NO<sub>2</sub><sup>+</sup> ([M+H]<sup>+</sup>) 306.1489. Found 306.1480.

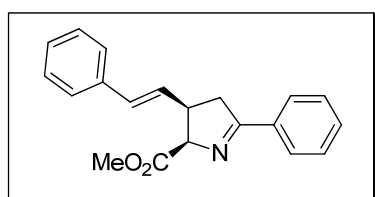

*cis-3i*: yellowish viscous oil

<sup>1</sup>H NMR (CDCl<sub>3</sub>, 500 MHz) δ 3.14 (dd, *J* = 16.5, 6.5 Hz, 1H), 3.25 (dd, *J* = 16.5, 8.5 Hz, 1H), 3.54–3.57 (m, 1H), 3.66 (s, 3H), 5.07 (d, *J* = 8.0 Hz, 1H), 6.12 (dd, *J* = 15.5, 9.0 Hz, 1H), 6.52 (d, *J* = 15.5 Hz, 1H), 7.23 (t, *J* = 7.0 Hz, 1H), 7.29–7.34 (m, 4H), 7.42–7.49 (m, 3H), 7.92 (d, *J* = 8.0 Hz, 2H).

<sup>13</sup>C NMR (CDCl<sub>3</sub>, 125 MHz) δ 41.4, 44.5, 51.9, 78.0, 126.2, 127.5, 128.0, 128.4, 128.5, 130.9, 131.2, 132.3, 133.5, 136.7, 171.0, 176.3.

IR (KBr, cm<sup>-1</sup>): 3058, 2951, 2844, 1739, 1652, 1345.

HRMS (ESI-TOF) Calcd for C<sub>20</sub>H<sub>20</sub>NO<sub>2</sub><sup>+</sup> ([M+H]<sup>+</sup>) 306.1489. Found 306.1480.



**3j**, *trans:cis* = 1.1:1.0

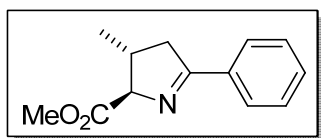

*trans*-**3j**: yellowish viscous oil

$^1\text{H}$  NMR ( $\text{CDCl}_3$ , 500 MHz)  $\delta$  1.25 (d,  $J = 7.0$  Hz, 3H), 2.61 (dd,  $J = 16.5, 6.5$  Hz, 1H), 2.67–2.73 (m, 1H), 3.32 (dd,  $J = 16.5, 8.5$  Hz, 1H), 3.77 (s, 3H), 4.46 (d,  $J = 6.0$  Hz, 1H), 7.38–7.46 (m, 3H), 7.86 (d,  $J = 7.5$  Hz, 2H).

$^{13}\text{C}$  NMR ( $\text{CDCl}_3$ , 125 MHz)  $\delta$  19.8, 36.0, 43.4, 52.0, 81.1, 127.8, 128.3, 130.8, 133.7, 173.0, 175.4.

IR (KBr,  $\text{cm}^{-1}$ ): 3056, 2952, 2843, 1738, 1652, 1344.

HRMS (ESI-TOF) Calcd for  $\text{C}_{13}\text{H}_{16}\text{NO}_2^+$  ( $[\text{M}+\text{H}]^+$ ) 218.1176. Found 218.1167.

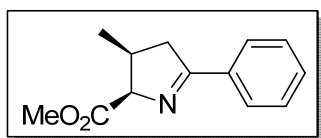

*cis*-**3j**: yellowish viscous oil

$^1\text{H}$  NMR ( $\text{CDCl}_3$ , 500 MHz)  $\delta$  1.04 (d,  $J = 7.0$  Hz, 3H), 2.61 (dd,  $J = 16.5, 6.0$  Hz, 1H), 2.87–2.89 (m, 1H), 2.61 (dd,  $J = 16.5, 8.5$  Hz, 1H), 3.76 (s, 3H), 4.91 (d,  $J = 8.0$  Hz, 1H), 7.40–7.46 (m, 3H), 7.86 (d,  $J = 7.5$  Hz, 2H).

$^{13}\text{C}$  NMR ( $\text{CDCl}_3$ , 125 MHz)  $\delta$  15.8, 34.9, 43.0, 51.7, 77.4, 127.8, 128.4, 130.9, 133.9, 171.7, 176.2.

IR (KBr,  $\text{cm}^{-1}$ ): 3057, 2951, 2845, 1740, 1650, 1346.

HRMS (ESI-TOF) Calcd for  $\text{C}_{13}\text{H}_{16}\text{NO}_2^+$  ( $[\text{M}+\text{H}]^+$ ) 218.1176. Found 218.1167.

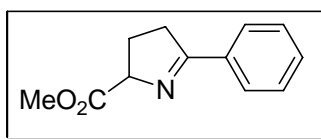

**3k**: yellowish viscous oil

$^1\text{H}$  NMR ( $\text{CDCl}_3$ , 500 MHz)  $\delta$  2.26 (m, 1H), 2.35 (m, 1H), 3.00 (m, 1H), 3.15 (m, 1H), 3.78 (s, 3H), 4.92 (dd,  $J = 8.5, 7.0$  Hz, 1H), 7.42 (m, 3H), 7.87 (d,  $J = 7.5$  Hz, 2H).

$^{13}\text{C}$  NMR ( $\text{CDCl}_3$ , 125 MHz)  $\delta$  26.3, 35.4, 52.3, 74.5, 128.0, 128.4, 131.0, 133.7, 173.4, 176.1.

IR (KBr,  $\text{cm}^{-1}$ ): 3060, 2952, 2844, 1732, 1615, 1345.

HRMS (ESI-TOF) Calcd for  $\text{C}_{12}\text{H}_{14}\text{NO}_2^+$  ( $[\text{M}+\text{H}]^+$ ) 204.1019. Found 204.1020.

**3l**, *trans:cis* = 1.6:1.0

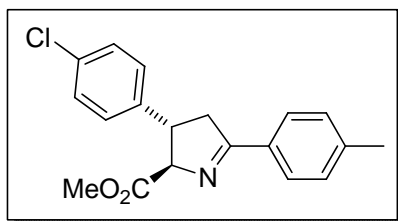

*trans*-**3l**: yellowish viscous oil

$^1\text{H}$  NMR ( $\text{CDCl}_3$ , 500 MHz)  $\delta$  2.40 (s, 3H), 3.10 (dd,  $J = 17.5, 9.5$  Hz, 1H), 3.65 (dd,  $J = 17.5, 6.5$  Hz, 1H), 3.79 (s, 3H), 3.86 (m, 1H), 4.88 (d,  $J = 6.0$  Hz, 1H), 7.17 (d,  $J = 9.0$  Hz, 2H), 7.24 (d,  $J = 9.0$  Hz, 2H), 7.28 (d,  $J = 8.0$  Hz, 2H), 7.79 (d,  $J = 8.0$  Hz, 2H).

$^{13}\text{C}$  NMR ( $\text{CDCl}_3$ , 125 MHz)  $\delta$  21.5, 44.5, 45.7, 52.4, 82.4, 128.1, 128.4, 129.0, 129.3, 130.7, 132.7, 141.6, 141.7, 172.4, 174.7.

IR (KBr,  $\text{cm}^{-1}$ ): 3087, 2999, 2923, 1733, 1660, 1410.

HRMS (ESI-TOF) Calcd for  $\text{C}_{19}\text{H}_{19}\text{ClNO}_2^+$  ( $[\text{M}+\text{H}]^+$ ) 328.1099. Found 328.1101.

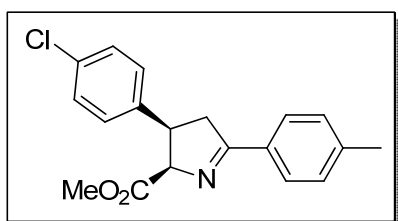

*cis*-**3l**: yellowish viscous oil

$^1\text{H}$  NMR ( $\text{CDCl}_3$ , 500 MHz)  $\delta$  2.42 (s, 3H), 3.33 (s, 3H), 3.34–3.40 (m, 2H), 3.97 (m, 1H), 5.21 (d,  $J = 8.5$  Hz, 1H), 7.10 (d,  $J = 8.5$  Hz, 2H), 7.22 (d,  $J = 8.5$  Hz, 2H), 7.27 (d,  $J = 8.0$  Hz, 2H), 7.84 (d,  $J = 8.0$  Hz, 2H).

$^{13}\text{C}$  NMR ( $\text{CDCl}_3$ , 125 MHz)  $\delta$  21.5, 42.1, 45.9, 51.5, 79.1, 128.1, 128.4, 128.8, 129.0, 129.3, 130.8, 132.8, 138.5, 141.8, 170.7, 176.0.

IR (KBr,  $\text{cm}^{-1}$ ): 3066, 2951, 2848, 1733, 1615, 1340.

HRMS (ESI-TOF) Calcd for  $\text{C}_{19}\text{H}_{19}\text{ClNO}_2^+$  ( $[\text{M}+\text{H}]^+$ ) 328.1099. Found 328.1101.

**3m**, *trans*:*cis* = 1.4:1.0

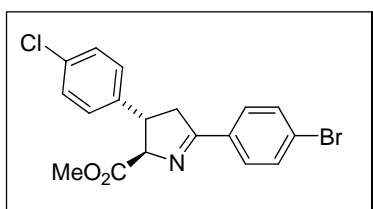

*trans*-**3m**: yellowish viscous oil

$^1\text{H}$  NMR ( $\text{CDCl}_3$ , 500 MHz)  $\delta$  3.08 (dd,  $J = 17.0, 7.0$  Hz, 1H), 3.65 (dd,  $J = 17.0, 10.0$  Hz, 1H), 3.78 (s, 3H), 3.85–3.89 (m, 1H), 4.88 (d,  $J = 6.5$  Hz, 1H), 7.16 (d,  $J = 7.5$  Hz, 2H), 7.28 (d,  $J = 7.5$  Hz, 2H), 7.56 (d,  $J = 7.5$  Hz, 2H), 7.76 (d,  $J = 7.5$  Hz, 2H).

$^{13}\text{C}$  NMR ( $\text{CDCl}_3$ , 125 MHz)  $\delta$  44.4, 45.7, 45.8, 52.5, 82.4, 126.0, 128.1, 129.0, 129.6, 131.8, 132.2,

132.8, 144.2, 172.1, 173.9.

IR (KBr,  $\text{cm}^{-1}$ ): 3064, 2950, 2840, 1735, 1616, 1349.

HRMS (ESI-TOF) Calcd for  $\text{C}_{18}\text{H}_{16}\text{ClBrNO}_2^+$  ( $[\text{M}+\text{H}]^+$ ) 392.0047. Found 392.0048.

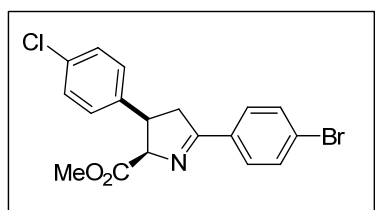

*cis*-**3m**: yellowish viscous oil

$^1\text{H}$  NMR ( $\text{CDCl}_3$ , 500 MHz)  $\delta$  3.34 (s, 3H), 3.38 (m, 2H), 4.00 (m, 1H), 5.22 (d,  $J = 8.5$  Hz, 1H), 7.09 (d,  $J = 8.5$  Hz, 2H), 7.24 (d,  $J = 8.5$  Hz, 2H), 7.60 (d,  $J = 8.5$  Hz, 2H), 7.83 (d,  $J = 8.5$  Hz, 2H).

$^{13}\text{C}$  NMR ( $\text{CDCl}_3$ , 125 MHz)  $\delta$  44.5, 45.7, 52.4, 82.4, 128.1, 128.4, 129.0, 129.3, 130.7, 132.7, 141.6, 141.7, 172.5, 174.7.

IR (KBr,  $\text{cm}^{-1}$ ): 3065, 2949, 2842, 1734, 1615, 1348.

HRMS (ESI-TOF) Calcd for  $\text{C}_{18}\text{H}_{16}\text{ClBrNO}_2^+$  ( $[\text{M}+\text{H}]^+$ ) 392.0047. Found 392.0048.

**3n**, *trans*:*cis* = 1.3:1.0

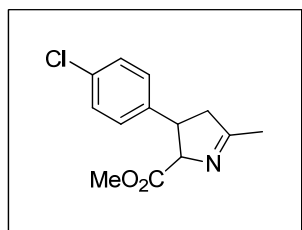

Yellowish viscous oil

$^1\text{H}$  NMR ( $\text{CDCl}_3$ , 500 MHz)

*trans*-**3n**,  $\delta$  2.16 (s, 3H), 2.68 (dd,  $J = 18.0, 7.0$  Hz, 1H), 3.16 (dd,  $J = 18.0, 9.5$  Hz, 1H), 3.71–3.75 (m, 4H), 4.65 (d,  $J = 8.5$  Hz, 1H), 7.12 (d,  $J = 8.5$  Hz, 2H), 7.24 (d,  $J = 8.5$  Hz, 2H).

*cis*-**3n**,  $\delta$  2.23 (s, 3H), 2.86 (dd,  $J = 17.5, 6.0$  Hz, 1H), 2.96 (dd,  $J = 17.5, 9.0$  Hz, 1H), 3.31 (s, 3H), 3.83 (m, 1H), 4.98 (d,  $J = 8.5$  Hz, 1H), 7.03 (d,  $J = 8.5$  Hz, 2H), 7.19 (d,  $J = 8.5$  Hz, 2H).

$^{13}\text{C}$  NMR ( $\text{CDCl}_3$ , 125 MHz)  $\delta$  19.8, 20.1, 45.9, 46.0, 46.1, 48.2, 51.5, 52.4, 78.8, 82.0, 128.2, 128.3, 128.8, 128.9, 132.5, 132.7, 138.5, 141.3, 170.8, 172.4, 177.3, 178.7.

IR (KBr,  $\text{cm}^{-1}$ ): 3060, 3030, 2955, 2874, 2842, 1739, 1682, 1613, 1347.

HRMS (ESI-TOF) Calcd for  $\text{C}_{13}\text{H}_{15}\text{ClNO}_2^+$  ( $[\text{M}+\text{H}]^+$ ) 252.0786. Found 252.0790.

**3o**, *trans*:*cis* = 1.7:1.0

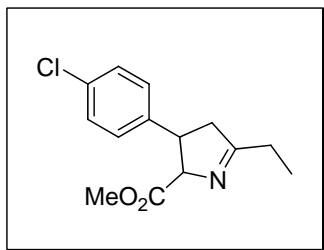

Yellowish viscous oil

<sup>1</sup>H NMR (CDCl<sub>3</sub>, 500 MHz)

*trans*-**3o**, δ 1.22 (t, *J* = 7.5 Hz, 3H), 2.46 (q, *J* = 7.5 Hz, 2H), 2.67 (dd, *J* = 17.5, 6.5 Hz, 1H), 3.16 (dd, *J* = 17.5, 10.0 Hz, 1H), 3.68–3.72 (m, 1H), 3.75 (s, 3H), 4.66 (d, *J* = 6.0 Hz, 1H), 7.12 (d, *J* = 8.0 Hz, 2H), 7.28 (d, *J* = 8.0 Hz, 2H).

*cis*-**3o**, δ 1.26 (t, *J* = 7.5 Hz, 3H), 2.54 (q, *J* = 7.5 Hz, 2H), 2.90 (dd, *J* = 17.5, 6.0 Hz, 1H), 2.97 (dd, *J* = 17.5, 9.0 Hz, 1H), 3.33 (s, 3H), 3.77–3.86 (m, 1H), 4.99 (d, *J* = 8.5 Hz, 1H), 7.04 (d, *J* = 8.0 Hz, 2H), 7.22 (d, *J* = 8.0 Hz, 2H).

<sup>13</sup>C NMR (CDCl<sub>3</sub>, 125 MHz) δ 10.5, 10.6, 27.0, 27.2, 44.0, 45.7, 45.9, 46.4, 51.4, 52.3, 78.6, 81.8, 128.3, 128.4, 128.8, 128.9, 132.5, 132.7, 138.5, 141.5, 170.8, 172.6, 181.7, 183.1.

IR (KBr, cm<sup>-1</sup>): 3061, 3029, 2956, 2875, 2843, 2359, 1739, 1735, 1662, 1615, 1344.

HRMS (ESI-TOF) Calcd for C<sub>14</sub>H<sub>17</sub>ClNO<sub>2</sub><sup>+</sup> ([M+H]<sup>+</sup>) 266.0942. Found 266.0945.

**3p**, *trans:cis* = 1.4:1.0

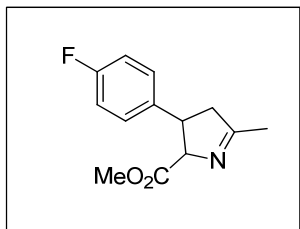

Yellowish viscous oil

<sup>1</sup>H NMR (CDCl<sub>3</sub>, 500 MHz)

*trans*-**3p**, δ 2.15 (s, 3H), 2.68 (dd, *J* = 17.5, 7.0 Hz, 1H), 3.16 (dd, *J* = 17.5, 10.0 Hz, 1H), 3.73 (m, 1H), 3.75 (s, 3H), 4.65 (d, *J* = 6.5 Hz, 1H), 6.99 (t, *J* = 8.5 Hz, 2H), 7.16 (dd, *J* = 8.5, 5.0 Hz, 2H).

*cis*-**3p**, δ 2.23 (s, 3H), 2.87 (dd, *J* = 17.5, 6.0 Hz, 1H), 2.99 (dd, *J* = 17.5, 9.0 Hz, 1H), 3.29 (s, 3H), 3.86 (m, 1H), 4.97 (d, *J* = 8.5 Hz, 1H), 6.93 (t, *J* = 8.5 Hz, 2H), 7.07 (dd, *J* = 8.5, 5.0 Hz, 2H).

<sup>13</sup>C NMR (CDCl<sub>3</sub>, 125 MHz) δ 19.8, 20.1, 45.8, 46.0, 46.1, 48.4, 51.4, 52.3, 78.9, 82.1, 115.1 (d), 115.7 (d), 128.4 (d), 129.0 (d), 135.6 (d), 138.6 (d), 160.7 (d), 162.7 (d), 170.9, 172.6, 177.4, 178.9.

IR (KBr, cm<sup>-1</sup>): 3044, 2998, 2953, 2846, 1732, 1716, 1682, 1651, 1381, 1361.

HRMS (ESI-TOF) Calcd for C<sub>13</sub>H<sub>14</sub>FNO<sub>2</sub><sup>+</sup> ([M+H]<sup>+</sup>) 236.1081. Found 236.1078.

**3q**, *trans:cis* = 1.5:1.0

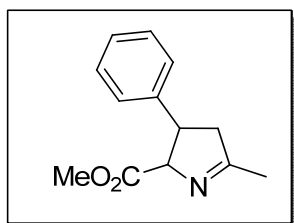

Yellowish viscous oil

$^1\text{H}$  NMR ( $\text{CDCl}_3$ , 500 MHz)

*trans*-**3t**,  $\delta$  2.15 (s, 3H), 2.71 (dd,  $J = 18.0, 10.0$  Hz, 1H), 3.15 (dd,  $J = 18.0, 7.0$  Hz, 1H), 3.74 (m, 4H), 4.70 (d,  $J = 9.0$  Hz, 1H), 7.27 (d,  $J = 7.5$  Hz, 2H), 7.33 (m,  $J = 7.5$  Hz, 3H).

*cis*-**3t**,  $\delta$  2.22 (s, 3H), 2.95 (m, 2H), 3.24 (s, 3H), 3.85 (m, 1H), 4.99 (d,  $J = 9.0$  Hz, 1H), 7.09 (d,  $J = 7.5$  Hz, 2H), 7.20 (m,  $J = 7.5$  Hz, 3H).

$^{13}\text{C}$  NMR ( $\text{CDCl}_3$ , 125 MHz)  $\delta$  19.6, 19.9, 45.7, 46.4, 46.6, 48.2, 51.1, 52.1, 78.8, 81.9, 126.7, 126.8, 126.9, 127.3, 128.1, 128.6, 139.7, 142.8, 170.8, 172.5, 177.5, 179.0.

IR (KBr,  $\text{cm}^{-1}$ ): 3062, 3029, 3001, 2951, 2846, 1732, 1647, 1603, 1584, 1380, 1315.

HRMS (ESI-TOF) Calcd for  $\text{C}_{13}\text{H}_{15}\text{NO}_2^+$  ( $[\text{M}+\text{H}]^+$ ) 218.1176. Found 218.1181.

**3r**, *trans:cis* = 1.5:1.0

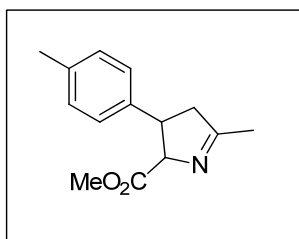

Yellowish viscous oil

$^1\text{H}$  NMR ( $\text{CDCl}_3$ , 500 MHz)

*trans*-**3r**,  $\delta$  2.14 (s, 3H), 2.31 (s, 3H), 2.68 (dd,  $J = 17.5, 7.5$  Hz, 1H), 3.12 (dd,  $J = 17.5, 7.5$  Hz, 1H), 3.66–3.72 (m, 4H), 4.66 (d,  $J = 6.5$  Hz, 1H), 7.04 (d,  $J = 8.5$  Hz, 2H), 7.07 (d,  $J = 8.5$  Hz, 2H).

*cis*-**3r**,  $\delta$  2.21 (s, 3H), 2.28 (s, 3H), 2.87 (dd,  $J = 17.0, 8.5$  Hz, 1H), 2.94 (dd,  $J = 17.0, 8.5$  Hz, 1H), 3.26 (s, 3H), 3.82 (m, 1H), 4.95 (d,  $J = 7.5$  Hz, 1H), 6.98 (d,  $J = 7.5$  Hz, 2H), 7.11 (d,  $J = 8.0$  Hz, 2H).

$^{13}\text{C}$  NMR ( $\text{CDCl}_3$ , 125 MHz)  $\delta$  19.1, 19.8, 20.1, 20.9, 46.0, 46.3, 46.4, 48.4, 51.3, 52.2, 78.9, 82.1, 126.8, 127.3, 128.9, 129.4, 136.4, 136.5, 136.8, 139.9, 171.0, 172.8, 177.6, 179.1.

IR (KBr,  $\text{cm}^{-1}$ ): 3022, 2951, 2922, 1733, 1683, 1646, 1578, 1380, 1356.

HRMS (ESI-TOF) Calcd for  $\text{C}_{14}\text{H}_{18}\text{NO}_2^+$  ( $[\text{M}+\text{H}]^+$ ) 232.1332. Found 232.1330.

**3s**, *trans:cis* = 1.5:1.0

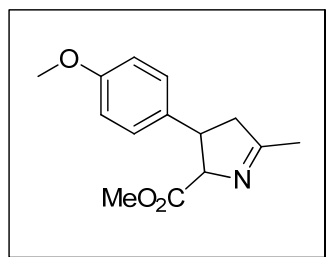

Yellowish viscous oil

<sup>1</sup>H NMR (CDCl<sub>3</sub>, 500 MHz)

*trans*-**3s**, δ 2.15 (s, 3H), 2.68 (dd, *J* = 17.5, 7.0 Hz, 1H), 3.13 (dd, *J* = 17.5, 8.5 Hz, 1H), 3.70 (m, 1H), 3.74 (s, 3H), 3.76 (s, 3H), 4.65 (d, *J* = 6.5 Hz, 1H), 6.85 (d, *J* = 8.5 Hz, 2H), 7.11 (d, *J* = 8.5 Hz, 2H).

*cis*-**3s**, δ 2.23 (s, 3H), 2.87 (dd, *J* = 17.5, 6.0 Hz, 1H), 2.96 (dd, *J* = 17.5, 9.0 Hz, 1H), 3.29 (s, 3H), 3.78 (s, 3H), 3.81 (m, 1H), 4.95 (d, *J* = 8.5 Hz, 1H), 6.79 (d, *J* = 9.0 Hz, 2H), 7.02 (d, *J* = 9.0 Hz, 2H).

<sup>13</sup>C NMR (CDCl<sub>3</sub>, 125 MHz) δ 19.8, 20.1, 45.9, 46.0, 46.1, 48.4, 51.4, 52.3, 55.1, 55.2, 79.0, 82.1, 113.6, 114.1, 127.9, 128.5, 131.9, 134.9, 158.4, 158.5, 171.1, 172.8, 177.6, 179.0.

IR (KBr, cm<sup>-1</sup>): 2998, 2952, 2837, 1739, 1683, 1669, 1646, 1379, 1356.

HRMS (ESI-TOF) Calcd for C<sub>14</sub>H<sub>18</sub>NO<sub>3</sub><sup>+</sup> ([M+H]<sup>+</sup>) 248.1281. Found 248.1297.

**3t**, *trans:cis* = 1.4:1.0

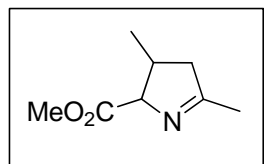

Yellowish viscous oil

<sup>1</sup>H NMR (CDCl<sub>3</sub>, 500 MHz)

*trans*-**3t**, δ 1.18 (d, 3H), 2.05 (s, 3H), 2.18 (dd, *J* = 17.0, 7.0 Hz, 1H), 2.53–2.58 (m, 1H), 3.13 (dd, *J* = 17.5, 8.5 Hz, 1H), 3.76 (s, 3H), 4.21 (d, *J* = 6.0 Hz, 1H).

*cis*-**3t**, δ 0.93 (d, 3H), 2.08 (s, 3H), 2.28 (dd, *J* = 16.0, 4.0 Hz, 1H), 2.67–2.76 (m, 2H), 3.75 (s, 3H), 4.65 (d, *J* = 7.0 Hz, 1H).

<sup>13</sup>C NMR (CDCl<sub>3</sub>, 125 MHz) δ 15.8, 19.7, 20.0, 20.2, 35.1, 36.4, 46.9, 47.3, 51.6, 52.1, 80.8, 172.0, 173.3, 178.1, 178.6.

IR (KBr, cm<sup>-1</sup>): 2956, 2875, 2845, 1740, 1645, 1380, 1355.

HRMS (ESI-TOF) Calcd for C<sub>8</sub>H<sub>14</sub>NO<sub>2</sub><sup>+</sup> ([M+H]<sup>+</sup>) 156.1019. Found 156.1027.

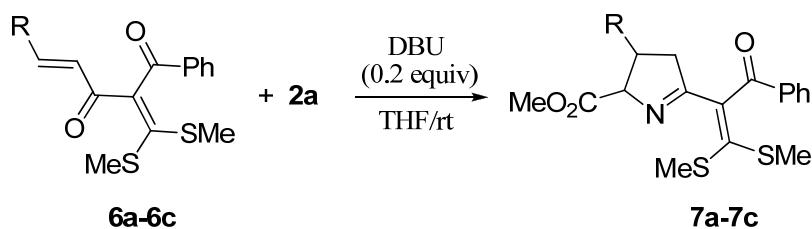

**7a**, *trans:cis* = 1.7:1.0

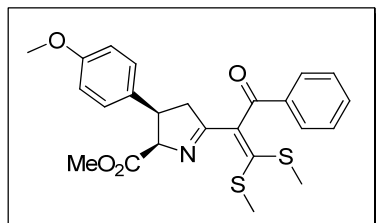

*cis*-**7a**: yellowish viscous oil

$^1\text{H NMR}$  ( $\text{CDCl}_3$ , 500 MHz)  $\delta$  2.09 (s, 3H), 2.41 (s, 3H), 3.18 (s, 3H), 3.24 (d,  $J = 8.5$  Hz, 2H), 3.69 (s, 3H), 3.73 (m, 1H), 5.01 (d,  $J = 8.5$  Hz, 1H), 6.69 (d,  $J = 8.5$  Hz, 2H), 6.98 (d,  $J = 8.5$  Hz, 2H), 7.41 (t,  $J = 7.5$  Hz, 2H), 7.48 (t,  $J = 7.5$  Hz, 1H), 7.92 (d,  $J = 7.5$  Hz, 2H).

$^{13}\text{C NMR}$  ( $\text{CDCl}_3$ , 125 MHz)  $\delta$  29.7, 30.5, 44.4, 46.0, 51.4, 55.2, 78.7, 113.6, 128.6, 128.7, 129.4, 130.8, 133.2, 137.0, 139.5, 146.0, 158.5, 170.3, 174.6, 193.9.

IR (KBr,  $\text{cm}^{-1}$ ): 3061, 2955, 2924, 1734, 1669, 1307.

HRMS (ESI-TOF) Calcd for  $\text{C}_{24}\text{H}_{26}\text{NO}_4\text{S}_2^+$  ( $[\text{M}+\text{H}]^+$ ) 456.1289. Found 456.1290.

**7b**, *trans:cis* = 1.4:1.0

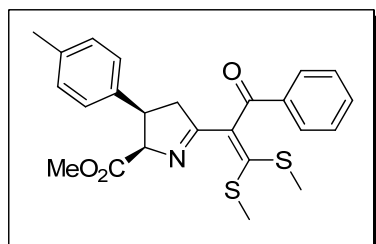

*cis*-**7b**: yellowish crystals, m.p. 190–192 °C

$^1\text{H NMR}$  ( $\text{CDCl}_3$ , 500 MHz)  $\delta$  2.16 (s, 3H), 2.28 (s, 3H), 2.47 (s, 3H), 3.23 (s, 3H), 3.33 (m, 2H), 3.82 (m, 1H), 5.10 (d,  $J = 8.5$  Hz, 1H), 7.02 (m, 4H), 7.48 (t,  $J = 7.5$  Hz, 2H), 7.55 (t,  $J = 7.5$  Hz, 1H), 7.99 (d,  $J = 7.5$  Hz, 2H).

$^{13}\text{C NMR}$  ( $\text{CDCl}_3$ , 125 MHz)  $\delta$  16.5, 16.6, 30.5, 34.1, 43.1, 46.2, 51.4, 77.9, 128.3, 128.7, 128.8, 129.0, 129.1, 129.3, 129.4, 130.9, 132.8, 133.1, 137.0, 137.2, 170.3, 180.8, 197.4.

IR (KBr,  $\text{cm}^{-1}$ ): 3055, 2950, 2924, 1740, 1662, 1312.

HRMS (ESI-TOF) Calcd for  $\text{C}_{24}\text{H}_{26}\text{NO}_3\text{S}_2^+$  ( $[\text{M}+\text{H}]^+$ ) 440.1349. Found 440.1356.

**7c**, *trans:cis* = 1.3:1.0

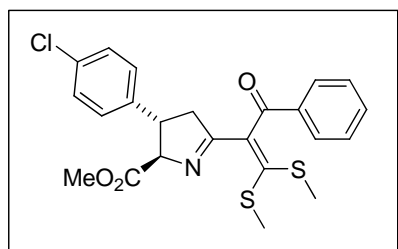

*trans*-**7c**: yellowish crystals, m.p. 150–152 °C

<sup>1</sup>H NMR (CDCl<sub>3</sub>, 500 MHz) δ 2.16 (s, 3H), 2.46 (s, 3H), 3.01 (dd, *J* = 17.5, 6.0 Hz, 1H), 3.56 (dd, *J* = 17.5, 9.5 Hz, 1H), 3.67 (m, 1H), 3.70 (s, 3H), 4.80 (d, *J* = 5.5 Hz, 1H), 7.08 (d, *J* = 8.5 Hz, 2H), 7.24 (d, *J* = 8.5 Hz, 2H), 7.47 (t, *J* = 7.5 Hz, 2H), 7.57 (t, *J* = 7.5 Hz, 1H), 7.95 (d, *J* = 7.5 Hz, 2H)

<sup>13</sup>C NMR (CDCl<sub>3</sub>, 125 MHz) δ 44.4, 45.7, 46.0, 47.2, 51.5, 78.6, 128.3, 128.4, 128.7, 129.0, 129.1, 129.4, 132.8, 133.3, 137.0, 137.5, 139.2, 146.6, 170.1, 174.4, 193.9.

IR (KBr, cm<sup>-1</sup>): 3066, 2952, 1736, 1615, 1345.

HRMS (ESI-TOF) Calcd for C<sub>23</sub>H<sub>23</sub>ClNO<sub>3</sub>S<sub>2</sub><sup>+</sup> ([M+H]<sup>+</sup>) 460.0802. Found 460.0822.

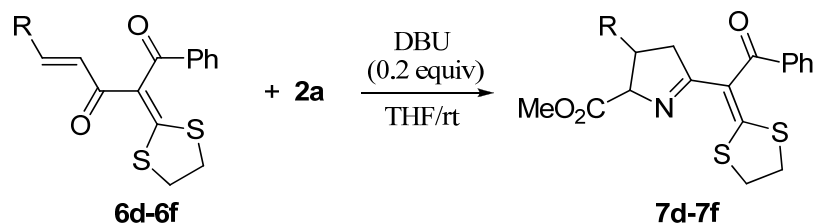

**7d**, *trans:cis* = 1.5:1.0

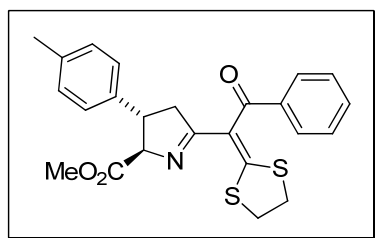

*trans*-**7d**: yellowish viscous oil

<sup>1</sup>H NMR (CDCl<sub>3</sub>, 500 MHz) δ 2.28 (s, 3H), 2.43 (dd, *J* = 17.5, 7.0 Hz, 1H), 2.77 (dd, *J* = 17.5, 8.0 Hz, 1H), 3.39 (m, 2H), 3.44 (m, 2H), 3.54 (m, 1H), 3.79 (s, 3H), 4.87 (d, *J* = 6.0 Hz, 1H), 6.92 (d, *J* = 8.5 Hz, 2H), 7.04 (d, *J* = 8.5 Hz, 2H), 7.42 (t, *J* = 8.5 Hz, 2H), 7.51 (t, *J* = 8.5 Hz, 1H), 7.77 (d, *J* = 8.5 Hz, 2H).

<sup>13</sup>C NMR (CDCl<sub>3</sub>, 125 MHz) δ 20.9, 36.7, 38.1, 46.3, 47.4, 52.2, 81.2, 120.3, 126.7, 128.4, 128.6, 129.3, 132.1, 136.3, 139.1, 139.2, 170.5, 172.3, 175.6, 191.0.

IR (KBr, cm<sup>-1</sup>): 3005, 2950, 1744, 1681, 1310.

HRMS (ESI-TOF) Calcd for C<sub>24</sub>H<sub>24</sub>NO<sub>3</sub>S<sub>2</sub><sup>+</sup> ([M+H]<sup>+</sup>) 424.1036. Found 424.1035.



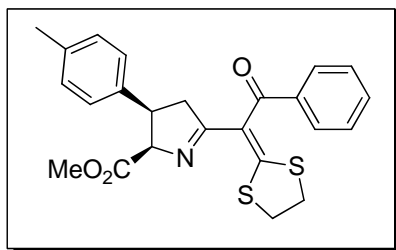

*cis*-**7d**: yellowish crystals, m.p. 176–178 °C

$^1\text{H}$  NMR ( $\text{CDCl}_3$ , 500 MHz)  $\delta$  2.53 (s, 3H), 2.53 (dd,  $J = 17.0, 9.0$  Hz, 1H), 2.68 (dd,  $J = 17.0, 9.0$  Hz, 1H), 3.31 (s, 3H), 3.37 (m, 2H), 3.42 (m, 2H), 3.67 (m, 1H), 5.18 (d,  $J = 9.0$  Hz, 1H), 6.85 (d,  $J = 9.0$  Hz, 2H), 6.99 (d,  $J = 9.0$  Hz, 2H), 7.44 (t,  $J = 7.5$  Hz, 2H), 7.53 (t,  $J = 7.5$  Hz, 1H), 7.81 (d,  $J = 7.5$  Hz, 2H).

$^{13}\text{C}$  NMR ( $\text{CDCl}_3$ , 125 MHz)  $\delta$  20.9, 36.9, 37.9, 44.4, 46.7, 51.2, 78.1, 120.7, 127.3, 128.4, 128.6, 128.7, 132.2, 135.5, 136.4, 139.2, 170.4, 170.5, 176.5, 191.7.

IR (KBr,  $\text{cm}^{-1}$ ): 3011, 2920, 1736, 1626, 1319.

HRMS (ESI-TOF) Calcd for  $\text{C}_{23}\text{H}_{22}\text{NO}_3\text{S}_2^+$  ( $[\text{M}+\text{H}]^+$ ) 424.1036. Found 424.1035.

**7e**, *trans:cis* = 1.4:1.0

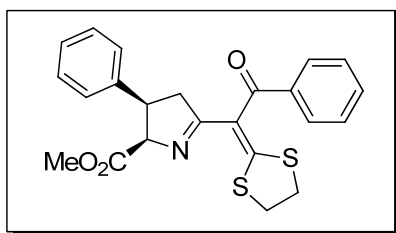

*cis*-**7e**: yellowish crystals, m.p. 150–152 °C

$^1\text{H}$  NMR ( $\text{CDCl}_3$ , 500 MHz)  $\delta$  2.45 (dd,  $J = 17.5, 6.5$  Hz, 1H), 2.80 (dd,  $J = 17.5, 9.0$  Hz, 1H), 3.36–3.41 (m, 2H), 3.42–3.44 (m, 2H), 3.57 (m, 1H), 3.79 (s, 3H), 4.91 (d,  $J = 6.0$  Hz, 1H), 7.03 (d,  $J = 8.0$  Hz, 2H), 7.18 (t,  $J = 7.5$  Hz, 1H), 7.24 (t,  $J = 7.5$  Hz, 2H), 7.41 (t,  $J = 7.5$  Hz, 2H), 7.51 (t,  $J = 7.5$  Hz, 1H), 7.78 (d,  $J = 7.5$  Hz, 2H).

$^{13}\text{C}$  NMR ( $\text{CDCl}_3$ , 125 MHz)  $\delta$  36.8, 38.1, 46.6, 47.5, 52.3, 81.3, 120.4, 126.8, 126.9, 128.5, 128.7, 132.2, 139.3, 142.4, 170.7, 172.4, 175.8, 191.2.

IR (KBr,  $\text{cm}^{-1}$ ): 3027, 2953, 1731, 1618, 1350.

HRMS (ESI-TOF) Calcd for  $\text{C}_{24}\text{H}_{24}\text{NO}_3\text{S}_2^+$  ( $[\text{M}+\text{H}]^+$ ) 438.1192. Found 438.1197.

**7f**, *trans:cis* = 1.3:1.0

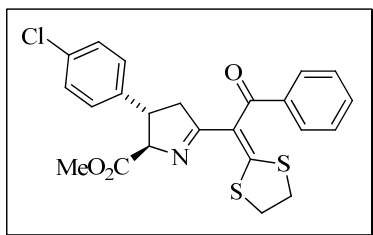

*trans*-**7f**: yellowish crystals, m.p. 153–155 °C

<sup>1</sup>H NMR (CDCl<sub>3</sub>, 500 MHz) δ 2.32 (dd, *J* = 17.0, 6.5 Hz, 1H), 2.73 (dd, *J* = 17.5, 9.5 Hz, 1H), 3.30 (m, 2H), 3.35 (m, 2H), 3.47 (m, 1H), 3.72 (s, 3H), 4.78 (d, *J* = 6.0 Hz, 1H), 6.88 (d, *J* = 7.5 Hz, 2H), 7.12 (d, *J* = 7.5 Hz, 2H), 7.33 (t, *J* = 7.5 Hz, 2H), 7.44 (t, *J* = 7.5 Hz, 1H), 7.69 (d, *J* = 7.5 Hz, 2H).

<sup>13</sup>C NMR (CDCl<sub>3</sub>, 125 MHz) δ 36.8, 38.1, 45.9, 47.3, 52.3, 81.1, 120.2, 128.2, 128.5, 128.6, 128.7, 132.2, 132.5, 139.2, 140.9, 170.7, 172.1, 175.4, 191.1.

IR (KBr, cm<sup>-1</sup>): 3060, 2952, 2928, 1736, 1630, 1352.

HRMS (ESI-TOF) Calcd for C<sub>23</sub>H<sub>21</sub>ClNO<sub>3</sub>S<sub>2</sub><sup>+</sup> ([M+H]<sup>+</sup>) 458.0646. Found 458.0663.

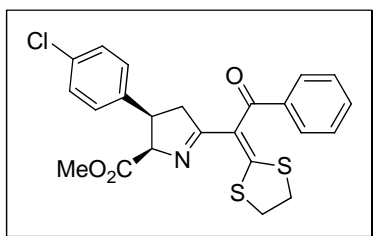

*cis*-**7f**: yellowish crystals, m.p. 172–174 °C

<sup>1</sup>H NMR (CDCl<sub>3</sub>, 500 MHz) δ 2.58 (dd, *J* = 17.0, 8.5 Hz, 1H), 2.65 (dd, *J* = 17.0, 7.5 Hz, 1H), 3.33 (s, 3H), 3.39 (m, 2H), 3.43 (m, 2H), 3.68 (m, 1H), 5.19 (d, *J* = 8.5 Hz, 1H), 6.90 (d, *J* = 8.5 Hz, 2H), 7.15 (d, *J* = 8.5 Hz, 2H), 7.44 (t, *J* = 7.5 Hz, 2H), 7.53 (t, *J* = 7.5 Hz, 1H), 7.80 (d, *J* = 7.5 Hz, 2H).

<sup>13</sup>C NMR (CDCl<sub>3</sub>, 125 MHz) δ 37.1, 38.0, 44.6, 46.4, 51.5, 78.1, 120.6, 128.3, 128.6, 128.8, 128.9, 132.4, 132.7, 137.5, 139.3, 170.4, 170.6, 176.1, 191.9.

IR (KBr, cm<sup>-1</sup>): 3061, 2949, 2924, 1736, 1625, 1345.

HRMS (ESI-TOF) Calcd for C<sub>23</sub>H<sub>21</sub>ClNO<sub>3</sub>S<sub>2</sub><sup>+</sup> ([M+H]<sup>+</sup>) 458.0646. Found 458.0663.

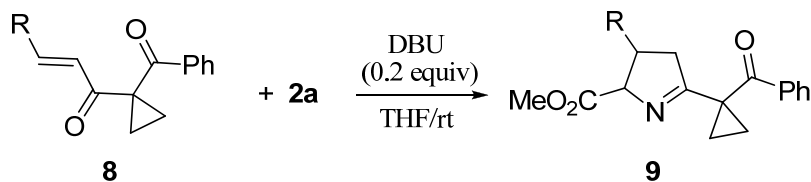

**9a**, *trans*:*cis* = 5.8:1.0

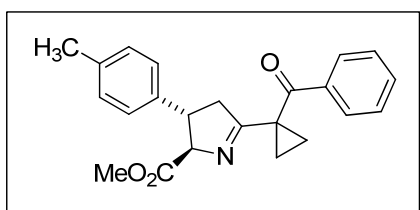

**trans-9a**: yellowish crystals, m.p. 89–91 °C

<sup>1</sup>H NMR (CDCl<sub>3</sub>, 500 MHz) δ 1.63 (s, 2H), 1.64 (s, 2H), 2.28 (s, 3H), 2.48 (dd, *J* = 17.5, 6.0 Hz, 1H), 2.96 (dd, *J* = 17.5, 10.0 Hz, 1H), 3.53 (m, 1H), 3.72 (s, 3H), 4.67 (d, *J* = 5.0 Hz, 1H), 6.82 (d, *J* = 8.5 Hz, 2H), 7.02 (d, *J* = 8.5 Hz, 2H), 7.46 (t, *J* = 7.5 Hz, 2H), 7.57 (t, *J* = 7.5 Hz, 1H), 7.99 (d, *J* = 7.5 Hz, 2H).

<sup>13</sup>C NMR (CDCl<sub>3</sub>, 125 MHz) δ 16.1, 16.5, 20.8, 33.7, 45.9, 46.0, 52.1, 81.3, 126.3, 128.4, 128.8, 129.3, 132.8, 136.3, 136.9, 139.7, 172.2, 179.4, 197.2.

IR (KBr, cm<sup>-1</sup>): 3060, 2952, 2924, 1739, 1668, 1438.

HRMS (ESI-TOF) Calcd for C<sub>23</sub>H<sub>24</sub>NO<sub>3</sub><sup>+</sup> ([M+H]<sup>+</sup>) 362.1751. Found 362.1750.

**9b**, *trans:cis* = 2.0:1.0

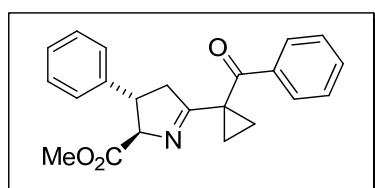

**trans-9b**: yellowish viscous oil

<sup>1</sup>H NMR (CDCl<sub>3</sub>, 500 MHz) δ 1.64 (s, 4H), 2.50 (dd, *J* = 17.5, 5.0 Hz, 1H), 2.99 (dd, *J* = 17.5, 5.0 Hz, 1H), 3.58 (m, 1H), 3.73 (s, 3H), 4.71 (d, *J* = 3.5 Hz, 1H), 6.93 (d, *J* = 7.0 Hz, 2H), 7.17–7.21 (m, 3H), 7.46 (t, *J* = 7.0 Hz, 2H), 7.57 (t, *J* = 7.0 Hz, 1H), 7.99 (d, *J* = 7.0 Hz, 2H).

<sup>13</sup>C NMR (CDCl<sub>3</sub>, 125 MHz) δ 16.3, 16.7, 33.9, 46.1, 46.3, 52.3, 81.4, 126.6, 126.9, 128.6, 128.8, 128.9, 133.0, 137.0, 142.9, 172.3, 179.6, 197.5.

IR (KBr, cm<sup>-1</sup>): 3063, 2952, 2927, 1738, 1670, 1373.

HRMS (ESI-TOF) Calcd for C<sub>22</sub>H<sub>22</sub>NO<sub>3</sub><sup>+</sup> ([M+H]<sup>+</sup>) 348.1594. Found 348.1589.

**9c**, *trans:cis* = 1.2:1.0

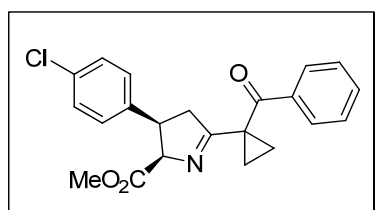

**cis-9c**: yellowish viscous oil

<sup>1</sup>H NMR (CDCl<sub>3</sub>, 500 MHz) δ 1.65 (m, 2H), 1.72 (m, 2H), 2.75 (m, 2H), 3.27 (s, 3H), 3.69 (m, 1H), 4.97 (d, *J* = 9.0 Hz, 1H), 6.84 (d, *J* = 8.0 Hz, 2H), 7.13 (d, *J* = 8.0 Hz, 2H), 7.49 (t, *J* = 7.5 Hz, 2H), 7.60 (t, *J* = 7.0 Hz, 1H), 8.04 (d, *J* = 7.0 Hz, 2H).

<sup>13</sup>C NMR (CDCl<sub>3</sub>, 125 MHz) δ 17.2, 18.1, 21.0, 44.3, 46.4, 51.3, 78.7, 127.5, 128.6, 128.9, 129.4, 133.2, 135.7, 136.6, 137.0, 139.5, 146.0, 170.2, 174.6, 193.9.

IR (KBr, cm<sup>-1</sup>): 3069, 2890, 2924, 1745, 1676, 1381.

HRMS (ESI-TOF) Calcd for C<sub>22</sub>H<sub>21</sub>ClNO<sub>3</sub><sup>+</sup> ([M+H]<sup>+</sup>) 382.1204. Found 382.1215.

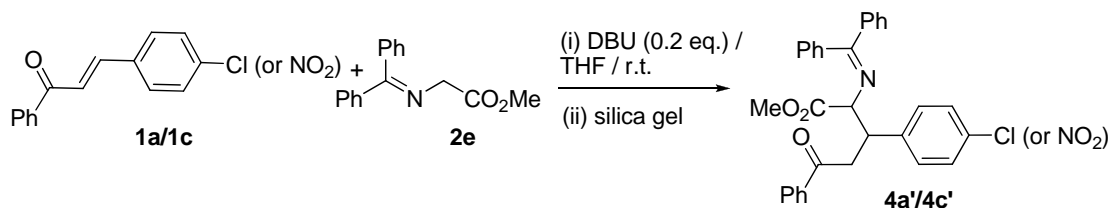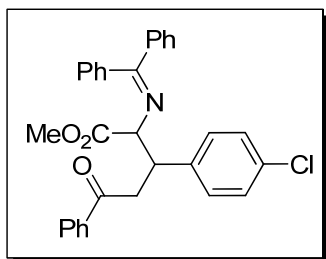

**4a'**: colorless crystals, m.p. 147–149 °C

<sup>1</sup>H NMR (CDCl<sub>3</sub>, 500 MHz) δ 3.64 (s, 3H), 3.71 (m, 1H), 3.79 (dd, *J* = 17.5, 10.0 Hz, 1H), 4.21 (m, 1H), 4.29 (d, *J* = 4.5 Hz, 1H), 6.66 (d, *J* = 4.5 Hz, 2H), 7.07 (d, *J* = 8.5 Hz, 2H), 7.14 (d, *J* = 8.5 Hz, 2H), 7.29–7.37 (m, 4H), 7.39–7.46 (m, 4H), 7.53 (t, *J* = 7.5 Hz, 1H), 7.66 (d, *J* = 8.0 Hz, 2H), 7.98 (d, *J* = 7.5 Hz, 2H).

<sup>13</sup>C NMR (CDCl<sub>3</sub>, 125 MHz) δ 39.2, 43.7, 52.1, 69.8, 127.2, 128.0, 128.1, 128.2, 128.3, 128.4, 128.5, 128.8, 129.6, 130.6, 132.3, 133.0, 135.6, 136.8, 138.9, 139.7, 171.2, 171.9, 198.1.

IR (KBr, cm<sup>-1</sup>): 3060, 3025, 2951, 1727, 1686, 1358.

HRMS (ESI-TOF) Calcd for C<sub>31</sub>H<sub>27</sub>ClNO<sub>3</sub><sup>+</sup> ([M+H]<sup>+</sup>) 496.1674. Found 496.1679.

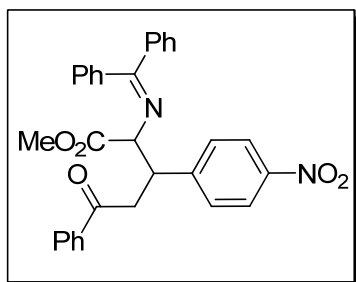

**4c'**: yellowish viscous oil

<sup>1</sup>H NMR (CDCl<sub>3</sub>, 500 MHz) δ 3.67 (s, 3H), 3.77 (m, 1H), 3.93 (dd, *J* = 17.5, 10.0 Hz, 1H), 4.32 (m, 2H), 6.66 (d, *J* = 4.5 Hz, 2H), 7.29–7.35 (m, 7H), 7.37–7.48 (m, 3H), 7.58 (t, *J* = 7.5 Hz, 1H), 7.65 (d, *J* = 8.0 Hz, 2H), 7.97 (d, *J* = 8.0 Hz, 2H), 8.05 (d, *J* = 10.0 Hz, 2H).

<sup>13</sup>C NMR (CDCl<sub>3</sub>, 125 MHz) δ 39.0, 44.1, 52.4, 69.2, 123.4, 127.1, 128.0, 128.2, 128.4, 128.6, 128.7, 128.8, 129.2, 130.9, 133.3, 135.5, 136.5, 138.7, 146.6, 149.3, 170.8, 172.5, 197.7.

IR (KBr, cm<sup>-1</sup>): 3060, 3027, 2952, 1738, 1685, 1346.

HRMS (ESI-TOF) Calcd for C<sub>31</sub>H<sub>27</sub>N<sub>2</sub>O<sub>5</sub><sup>+</sup> ([M+H]<sup>+</sup>) 507.1914. Found 507.1923.

### III. Determination on the ratio of *trans/cis* configuration

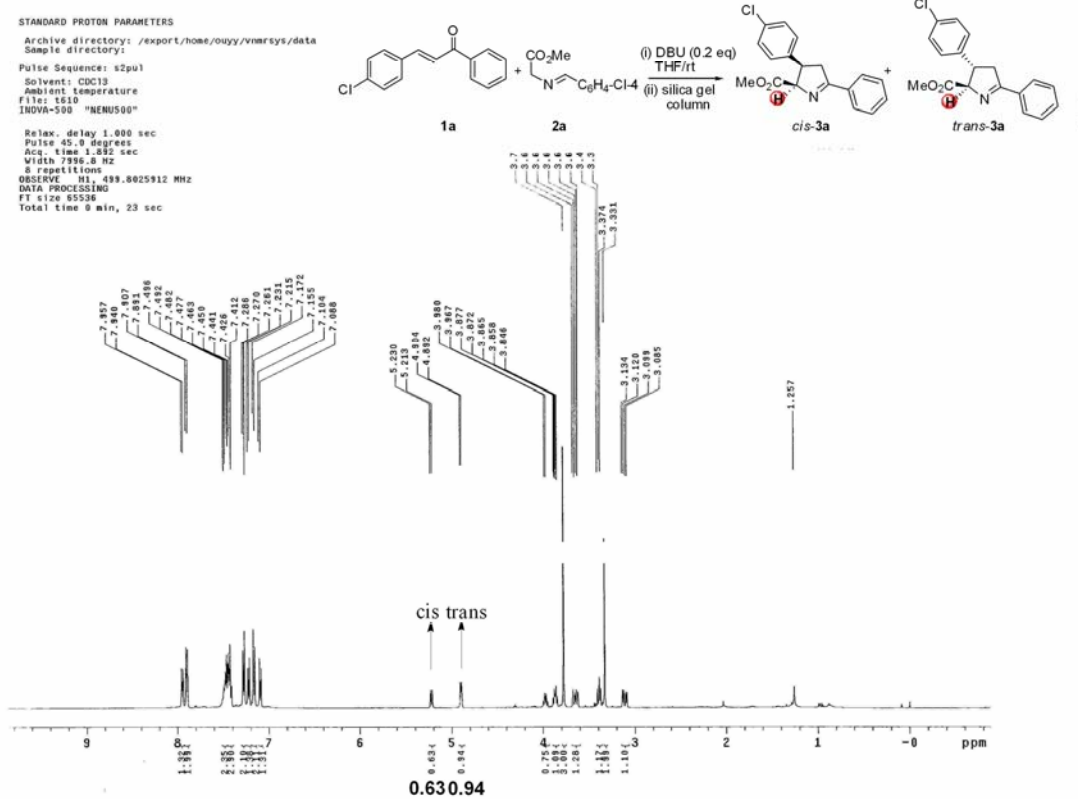

The *trans/cis* configuration of **3** was calculated on the integration of the methylene proton connected to CO<sub>2</sub>Me group at 4.1-5.4 ppm in <sup>1</sup>H NMR spectra of the diastereomeric mixture, in which the signal for the *cis*-diastereoisomer was further determined by the crystallographic data of *cis*-**3d** (see supplementary crystallographic data in part V). For example, in the <sup>1</sup>H NMR spectrum of diastereomeric mixture **3a**, the peak at 5.22 ppm is attributed to the *cis*-form while the peak at 4.90 ppm is attributed to the *trans*-form with an integration ratio of 0.94/0.63 = 1.5/1.0. Thus, the ratio of *trans/cis* configuration of **3a** is determined as 1.5/1.0.

### IV. Copies of $^1\text{H}$ NMR and $^{13}\text{C}$ NMR spectra

STANDARD PROTON PARAMETERS

Archive directory: /export/home/ouyy/vnmrsys/data  
 Sample directory:  
 Pulse Sequence: s2pu1  
 Solvent: CDCl3  
 Ambient temperature  
 File: t535  
 INOVA-500 "NENU500"  
 Relax. delay 1.000 sec  
 Pulse 45.0 degree  
 Acq. time 1.932 sec  
 Width 7398.6 Hz  
 Single scan  
 OBSERVE H1 499.8025926 MHz  
 DATA PROCESSING  
 FT size 65536  
 Total time 0 min, 2 sec

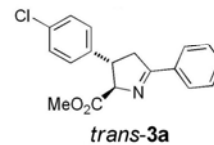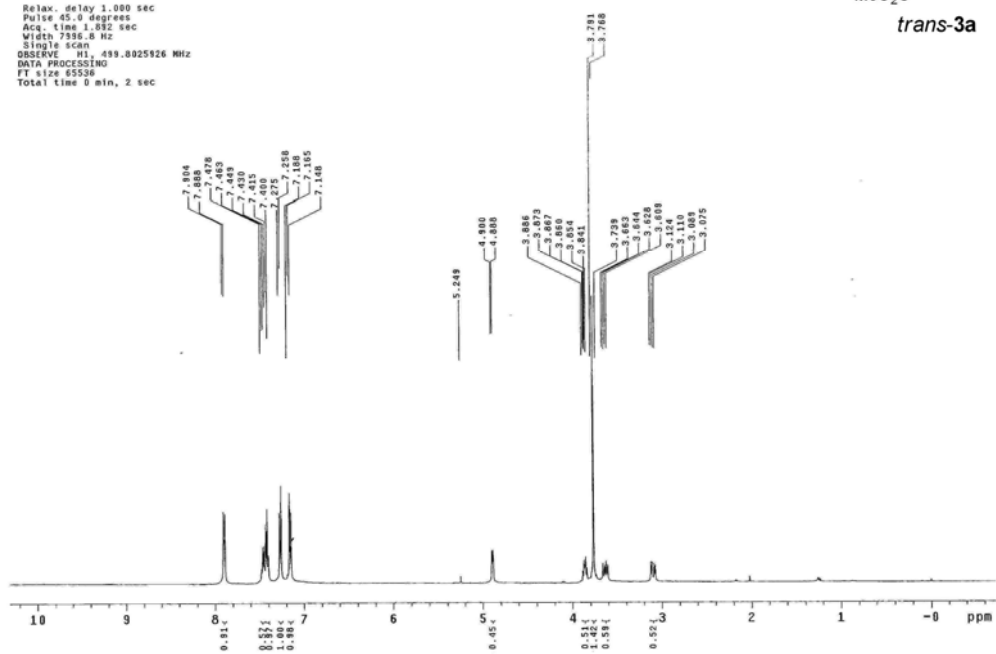

STANDARD CARBON PARAMETERS

Archive directory: /export/home/ouyy/vnmrsys/data  
 Sample directory:  
 Pulse Sequence: s2pu1  
 Solvent: CDCl3  
 Ambient temperature  
 User: 3-14-87  
 File: t521  
 INOVA-500 "NENU500"  
 Relax. delay 0.500 sec  
 Pulse 45.0 degree  
 Acq. time 1.300 sec  
 Width 31421.0 Hz  
 64 repetitions  
 OBSERVE C15 125.6754661 MHz  
 DECOUPLE H1 499.8050905 MHz  
 Power 92 dB  
 Continuously on  
 WALTZ-16 modulated  
 DATA PROCESSING  
 Line broadening 1.5 Hz  
 FT size 131072  
 Total time 2 hr, 3 min, 31 sec

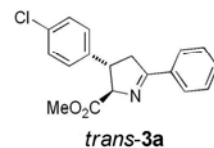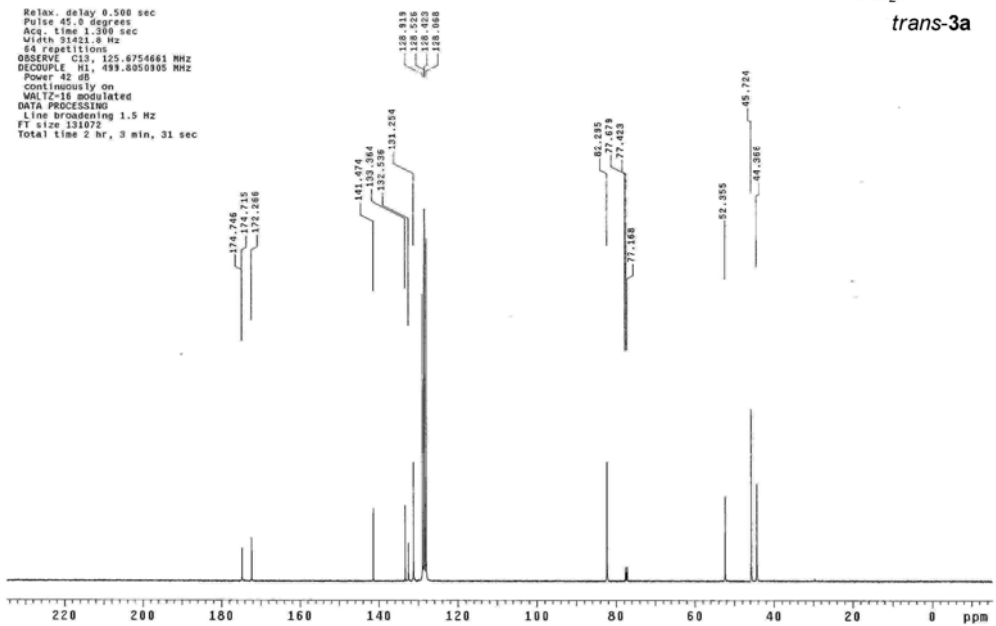

STANDARD PROTON PARAMETERS

Archive directory: /export/home/ouyy/vnmrsys/data  
 Sample directory:  
 Pulse Sequence: s2pul  
 Solvent: CDCl3  
 Ambient temperature  
 File: t536  
 INOVA-500 "NENUS00"  
 Relax. delay 1.000 sec  
 Pulse 45.0 degrees  
 Acq. time 1.932 sec  
 Width 7866.8 Hz  
 8 repetitions  
 OBSERVE H1, 499.8025914 MHz  
 DATA PROCESSING  
 FT size 65536  
 Total time 0 min, 23 sec

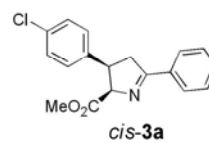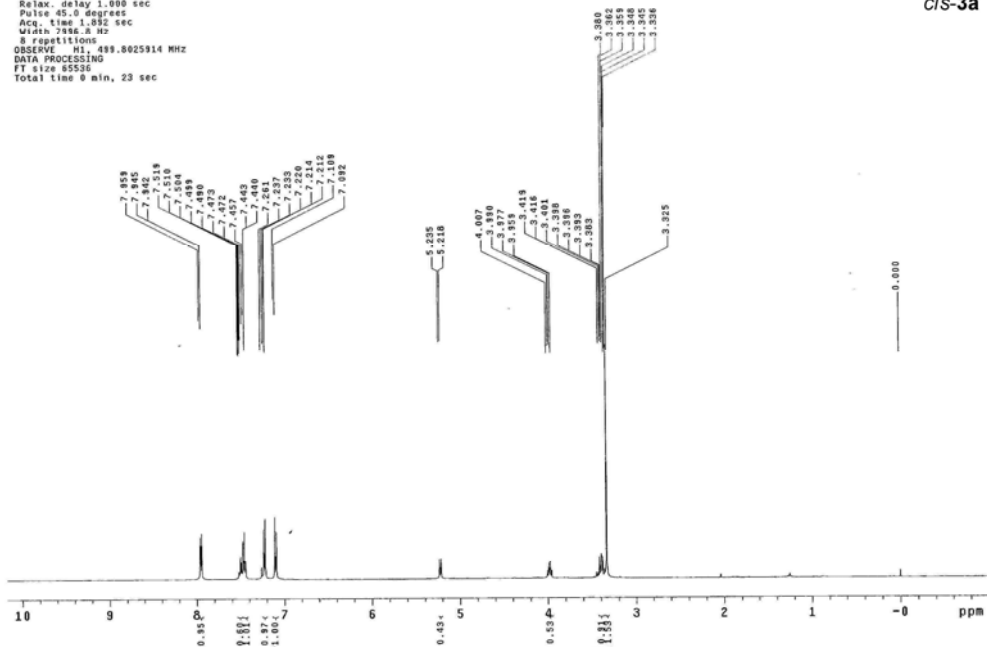

STANDARD CARBON PARAMETERS

Archive directory: /export/home/ouyy/vnmrsys/data  
 Sample directory:  
 Pulse Sequence: s2pul  
 Solvent: CDCl3  
 Ambient temperature  
 User: 1-14-07  
 File: t622  
 INOVA-500 "NENUS00"  
 Relax. delay 0.500 sec  
 Pulse 45.0 degrees  
 Acq. time 1.389 sec  
 Width 31421.8 Hz  
 128 repetitions  
 OBSERVE C13, 125.6754786 MHz  
 DECOUPLE H1, 499.8050965 MHz  
 Power 42 dB  
 Continuous ly on  
 WALTZ-16 modulated  
 DATA PROCESSING  
 Line broadening 1.5 Hz  
 FT size 131072  
 Total time 2 hr, 3 min, 31 sec

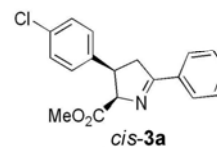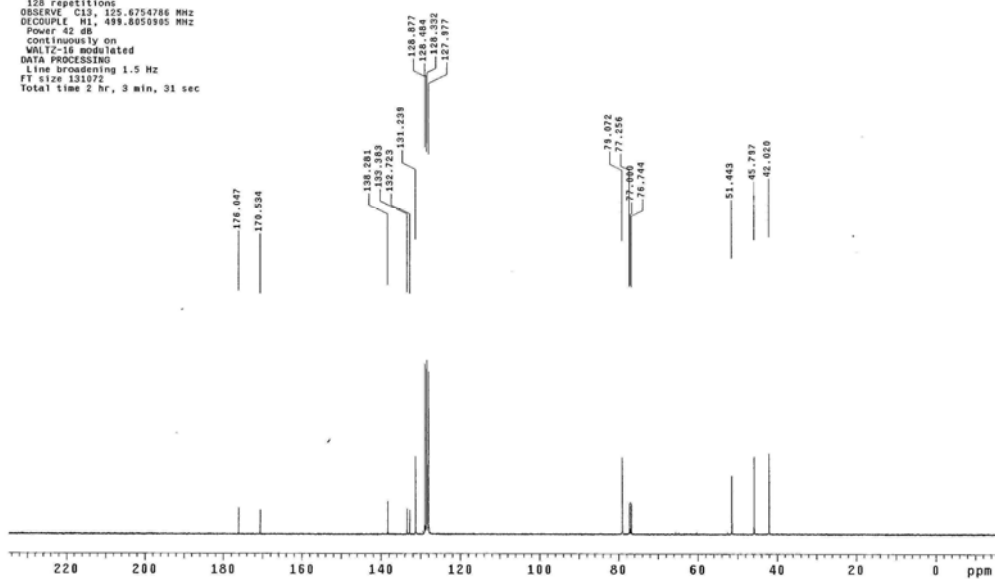

**3a + 4-ClC<sub>6</sub>H<sub>4</sub>CHO** (from the crude product of **1a** with **2a**)

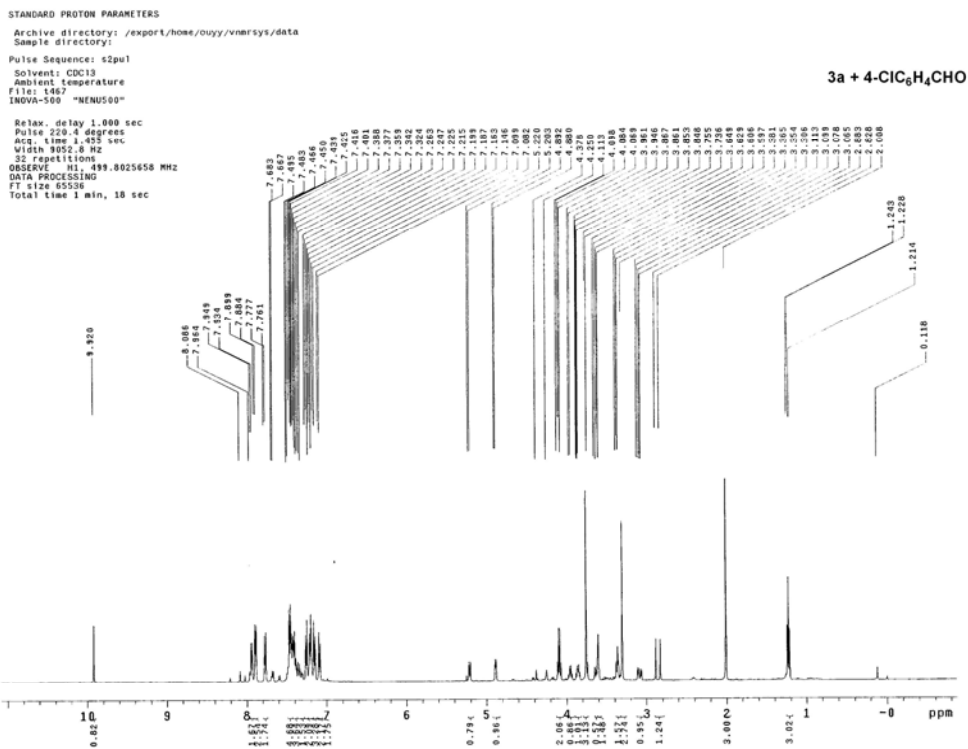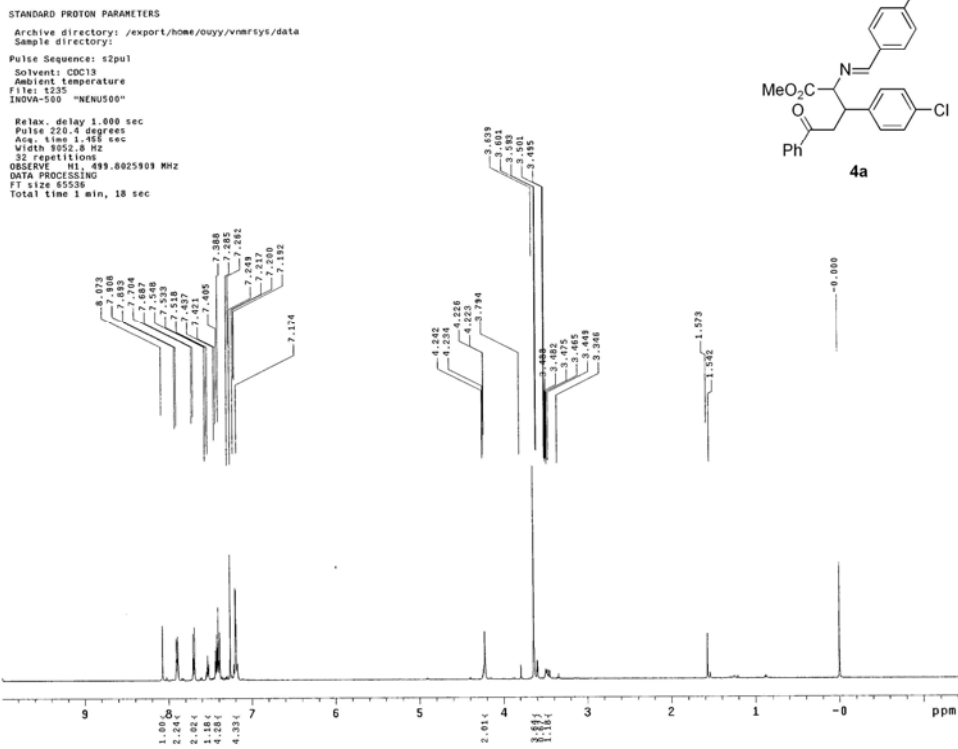



STANDARD PROTON PARAMETERS

Archive directory: /export/home/ouyy/vnmrsys/data  
 Sample directory:  
 Pulse Sequence: s2pu1  
 Solvent: CDCl3  
 Ambient temperature  
 File: V782  
 INOVA-500 "NENU500"  
 Relax. delay 1.000 sec  
 Pulse 45.0 degrees  
 Acq. time 1.832 sec  
 Width 8231.0 Hz  
 S repetitions  
 OBSERVE N1, 499.8025930 MHz  
 DATA PROCESSING  
 FT size 85536  
 Total time 0 min, 23 sec

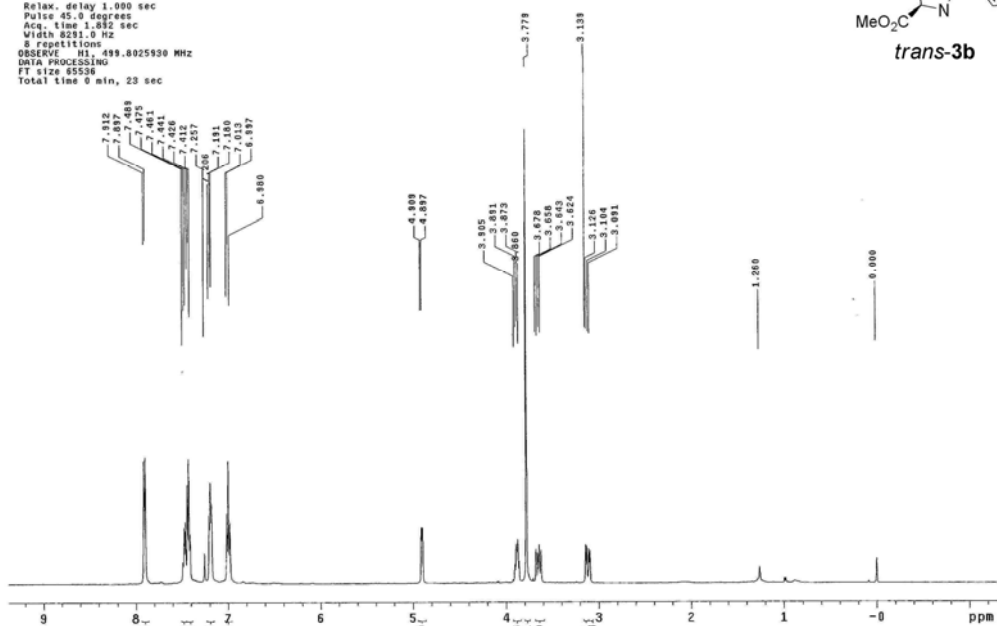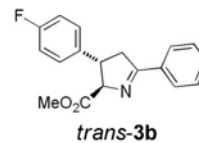

STANDARD CARBON PARAMETERS

Archive directory: /export/home/ouyy/vnmrsys/data  
 Sample directory:  
 Pulse Sequence: s2pu1  
 Solvent: CDCl3  
 Ambient temperature  
 User: 1-14-07  
 File: x221  
 INOVA-500 "NENU500"  
 Relax. delay 0.500 sec  
 Pulse 45.0 degrees  
 Acq. time 1.380 sec  
 Width 32421.8 Hz  
 OBSERVE C13, 125.8754648 MHz  
 DECOUPLE N1, 499.8050905 MHz  
 Power 42 dB  
 continuous by on  
 WALTZ-16 modulated  
 DATA PROCESSING  
 Line broadening 1.5 Hz  
 FT size 131072  
 Total time 3 hr, 56 sec

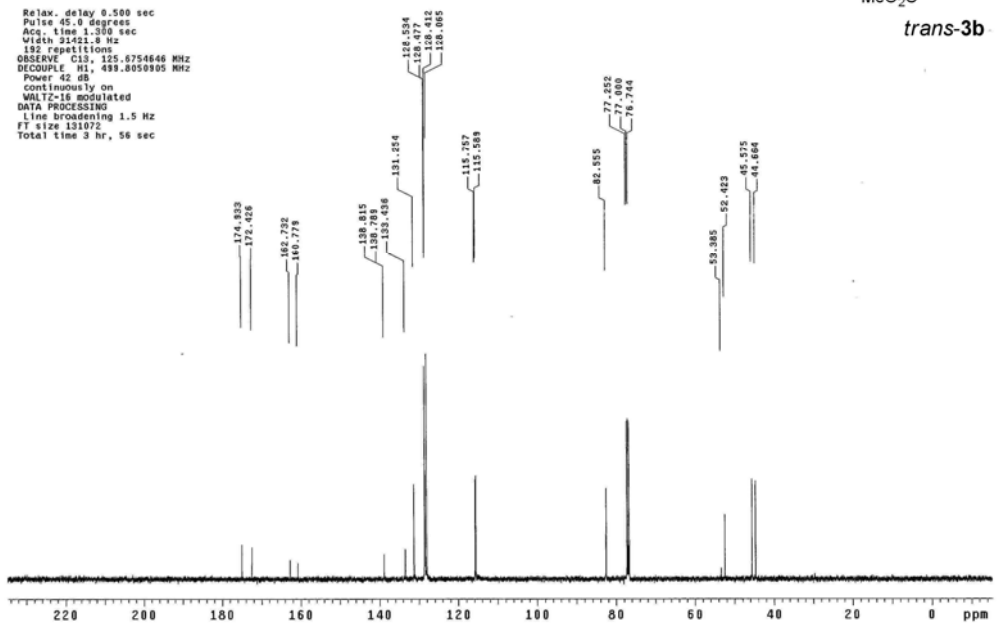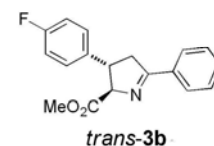

STANDARD PROTON PARAMETERS

Archive directory: /export/home/ouyy/vnmrsys/data  
 Sample directory:  
 Pulse Sequence: s2pu1  
 Solvent: CDCl3  
 Ambient temperature  
 File: v793  
 INOVA-500 "MNU500"  
 Relax. delay 1.000 sec  
 Pulse 45.0 degrees  
 Acq. time 1.852 sec  
 Width 8291.8 Hz  
 # repetitions  
 OBSERVE H1, 499.8025907 MHz  
 DATA PROCESSING  
 FT size 65536  
 Total time 0 min, 23 sec

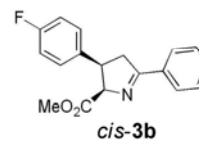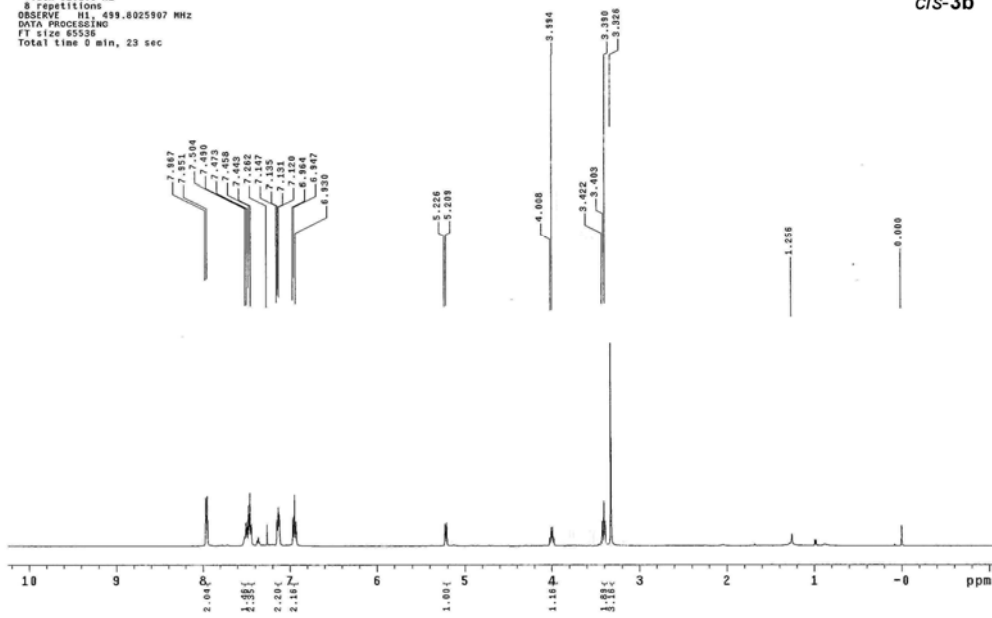

STANDARD CARBON PARAMETERS

Archive directory: /export/home/ouyy/vnmrsys/data  
 Sample directory:  
 Pulse Sequence: s2pu1  
 Solvent: CDCl3  
 Ambient temperature  
 User: 1-14-87  
 File: x522  
 INOVA-500 "MNU500"  
 Relax. delay 0.500 sec  
 Pulse 45.0 degrees  
 Acq. time 1.300 sec  
 Width 31421.8 Hz  
 # repetitions  
 OBSERVE C13, 125.8754694 MHz  
 DECOUPLE H1, 499.8050905 MHz  
 Power 42 dB  
 continuously on  
 WALTZ-16 modulated  
 DATA PROCESSING  
 Line broadening 1.5 Hz  
 FT size 131872  
 Total time 3 hr, 56 sec

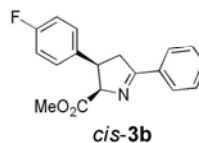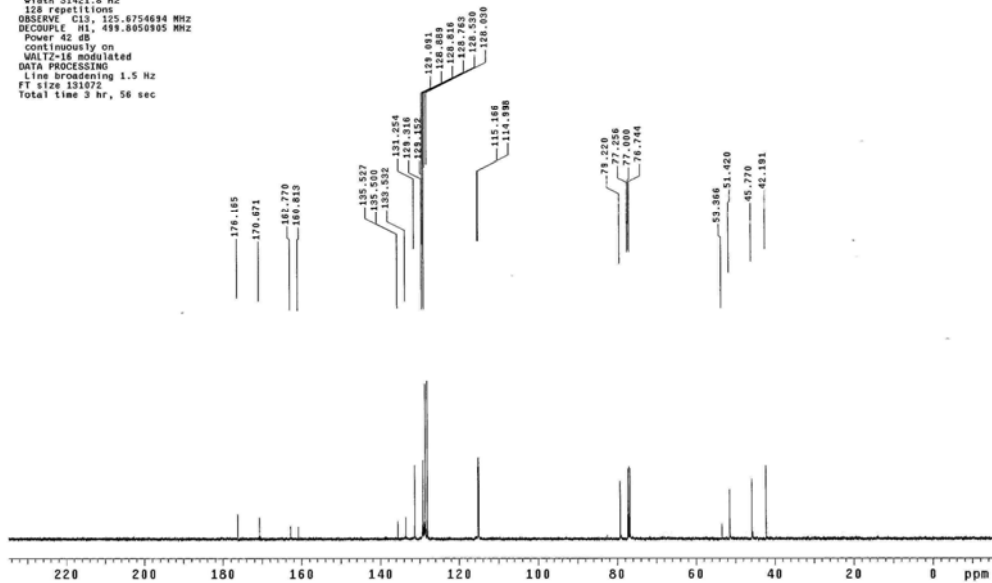

STANDARD PROTON PARAMETERS

Archive directory: /export/home/ouyy/vnmrsys/data  
 Sample directory:  
 Pulse Sequence: s2pu1  
 Solvent: CDCl3  
 Ambient temperature  
 File: w510  
 INOVA-500 "NENU500"  
 Relax. delay 1.000 sec  
 Pulse 45.0 degrees  
 Acq. time 1.892 sec  
 Width 7196.8 Hz  
 S repetitions  
 OBSERVE N1, 499.8025894 MHz  
 DATA PROCESSING  
 FT size 65356  
 Total time 0 min, 23 sec

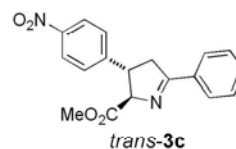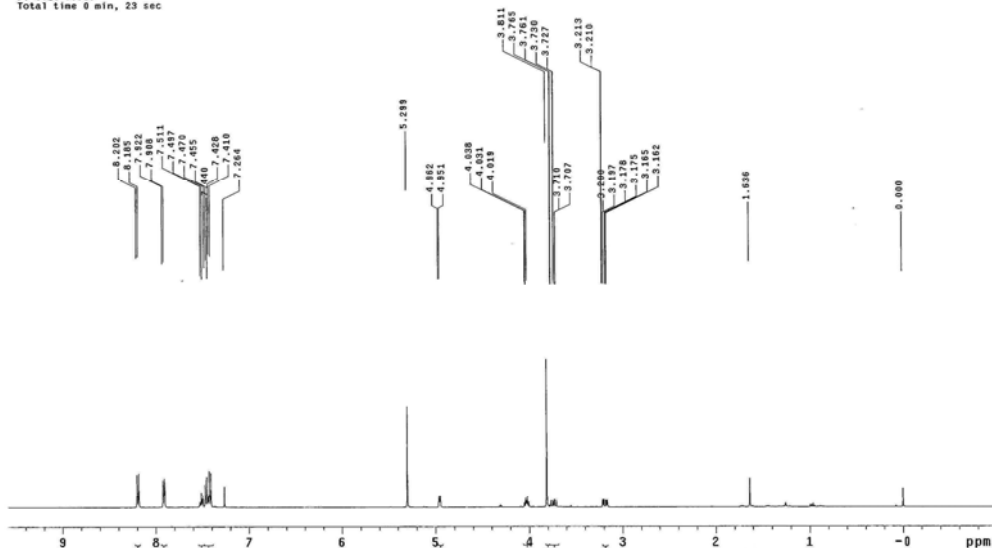

STANDARD CARBON PARAMETERS

Archive directory: /export/home/ouyy/vnmrsys/data  
 Sample directory:  
 Pulse Sequence: v2pu1  
 Solvent: CDCl3  
 Ambient temperature  
 User: 1-18-87  
 File: w535  
 INOVA-500 "NENU500"  
 Relax. delay 0.500 sec  
 Pulse 45.0 degrees  
 Acq. time 1.308 sec  
 Width 21421.3 Hz  
 S repetitions  
 OBSERVE C13, 125.6754637 MHz  
 DECOUPLE N1, 499.8050905 MHz  
 Power 42 dB  
 continuously on  
 WALTZ-16 modulated  
 DATA PROCESSING  
 Line broadening 1.5 Hz  
 FT size 131072  
 Total time 3 hr, 56 sec

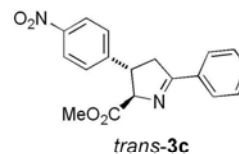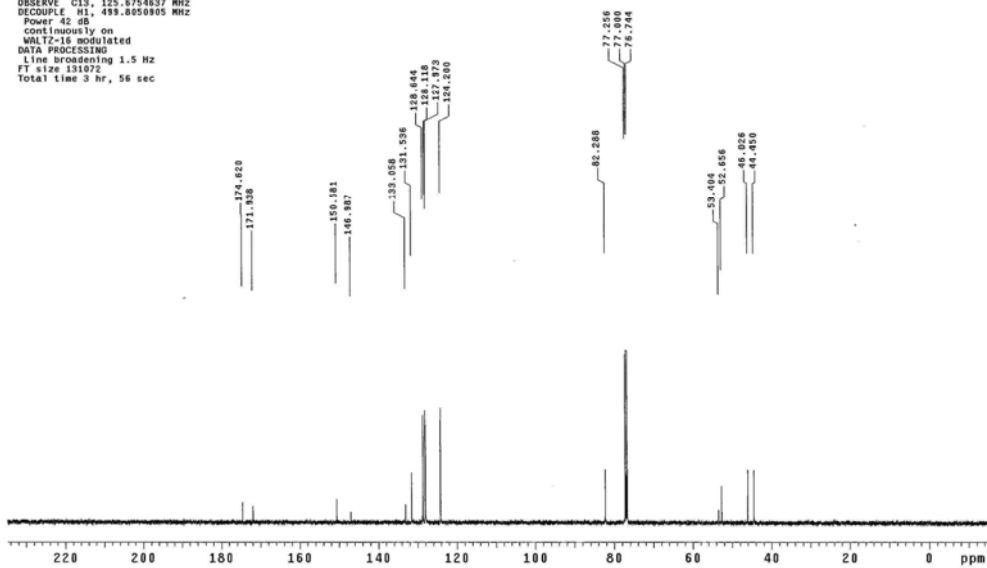

STANDARD PROTON PARAMETERS

Archive directory: /export/home/ouyy/vnmrsys/data  
 Sample directory:  
 Pulse Sequence: s2pul  
 Solvent: CDCl3  
 Ambient temperature  
 File: y434  
 INOVA-500 "NENUS00"  
 Relax delay 1.000 sec  
 Pulse 45.0 degrees  
 Acq. time 1.852 sec  
 Width 8016.4 Hz  
 OBSERVE H1, 499.8025874 MHz  
 8 repetitions  
 DATA PROCESSING  
 FT size 85536  
 Total time 0 min, 23 sec

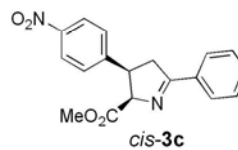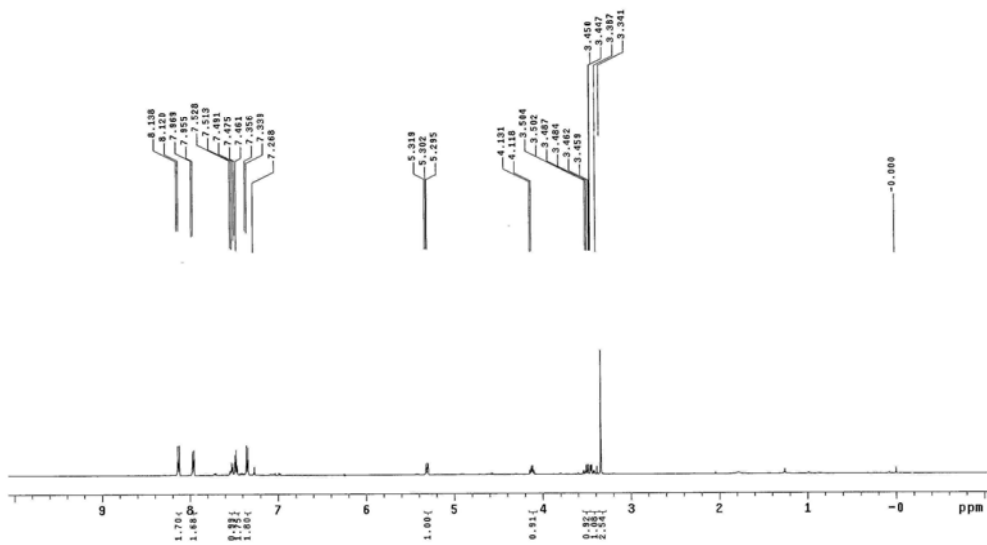

STANDARD CARBON PARAMETERS

Archive directory: /export/home/ouyy/vnmrsys/data  
 Sample directory:  
 Pulse Sequence: s2pul  
 Solvent: cdcl3  
 Ambient temperature  
 User: 1-14-87  
 File: y437  
 INOVA-500 "NENUS00"  
 Relax delay 0.500 sec  
 Pulse 45.0 degrees  
 Acq. time 1.300 sec  
 Width 31821.8 Hz  
 64 repetitions  
 OBSERVE C13, 125.6754651 MHz  
 DECOUPLE H1, 499.8050905 MHz  
 Power 42 db  
 continuously on  
 WALTZ-16 modulated  
 DATA PROCESSING  
 Line broadening 1.5 Hz  
 FT size 131972  
 Total time 2 hr, 3 min, 31 sec

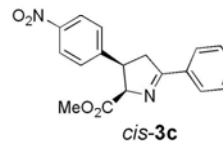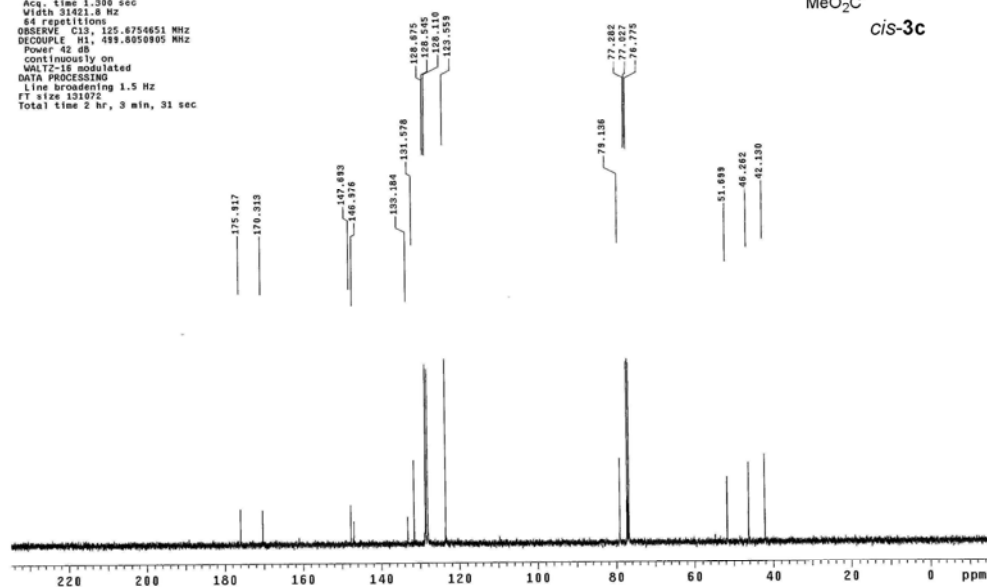

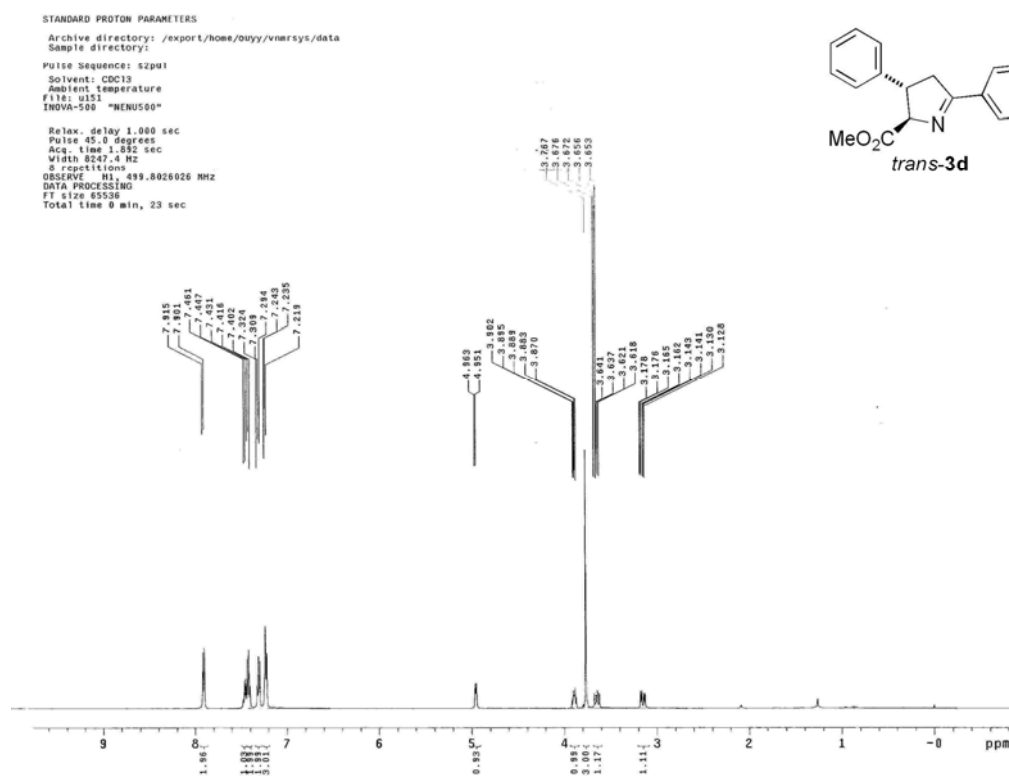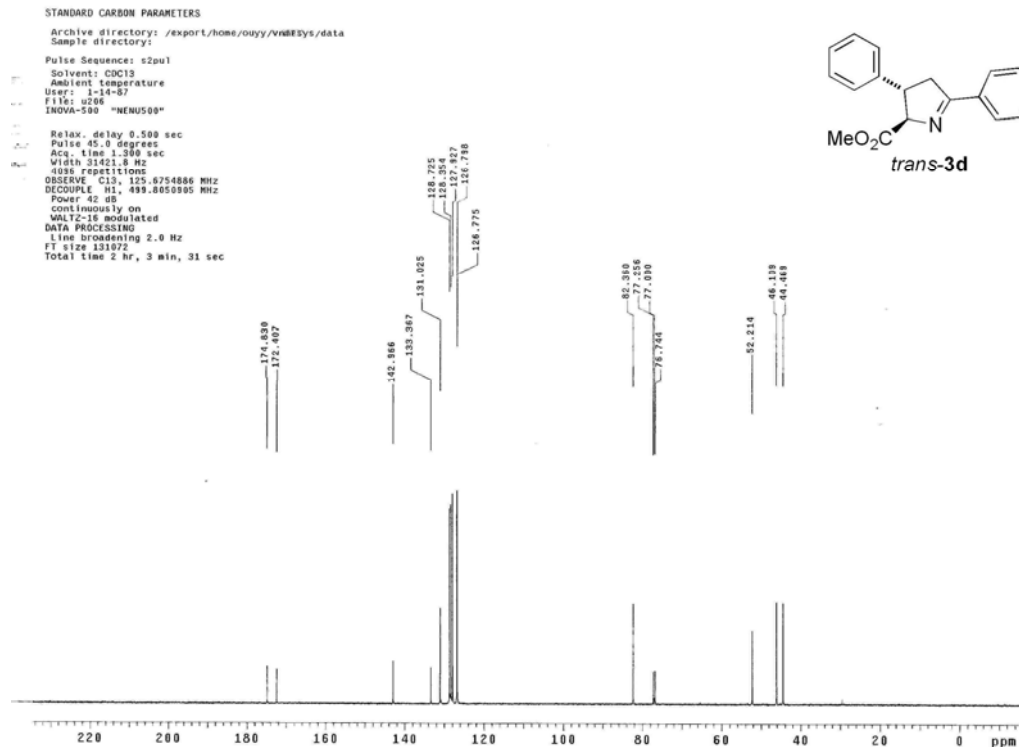

STANDARD PROTON PARAMETERS

Archive directory: /export/home/ouyy/vnmrsys/data  
 Sample directory:  
 Pulse Sequence: s2pu1  
 Solvent: CDCl3  
 Ambient temperature:  
 File: u152  
 INOVA-500 "NENU500"  
 Relax. delay 1.000 sec  
 Pulse 45.0 degrees  
 Acq. time 1.892 sec  
 Width 8247.4 Hz  
 8 repetitions  
 OBSERVE H1, 499.8625955 MHz  
 DATA PROCESSING  
 FT size 65536  
 Total time 9 min, 23 sec

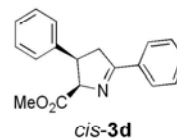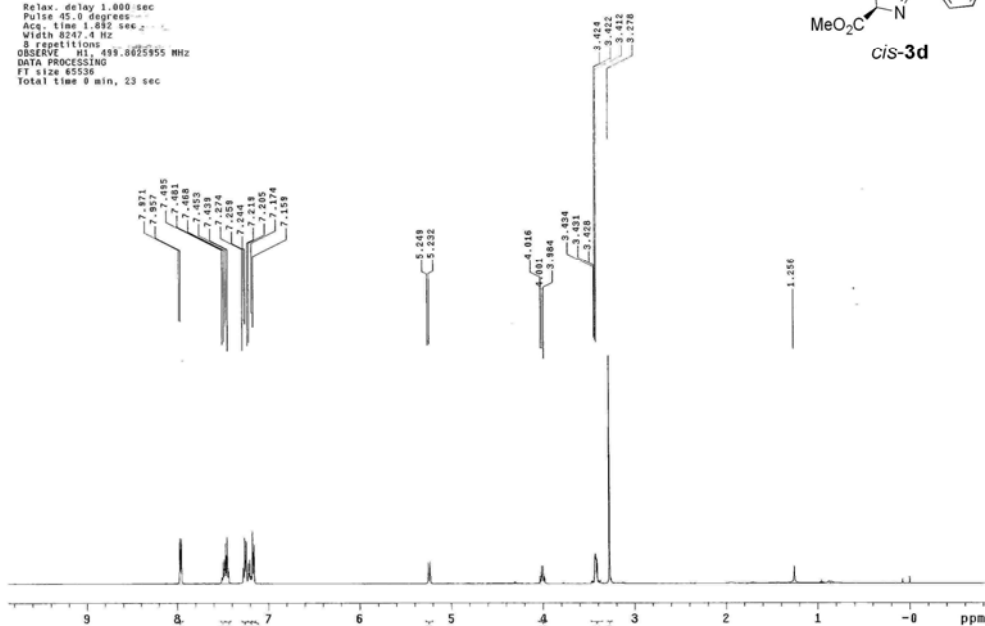

STANDARD CARBON PARAMETERS

Archive directory: /export/home/ouyy/vnmrsys/2011a  
 Sample directory:  
 Pulse Sequence: s2pu1  
 Solvent: CDCl3  
 Ambient temperature  
 User: 1-14-87  
 File: u287  
 INOVA-500 "NENU500"  
 Relax. delay 0.500 sec  
 Pulse 45.0 degrees  
 Acq. time 1.380 sec  
 Width 21621.8 Hz  
 64 repetitions  
 OBSERVE C13, 125.6754766 MHz  
 DECOUPLE H1, 499.8050905 MHz  
 Power 42 dB  
 continuously on  
 WALTZ-16 modulated  
 DATA PROCESSING  
 Line broadening 2.0 Hz  
 FT size 131972  
 Total time 2 hr, 3 min, 31 sec

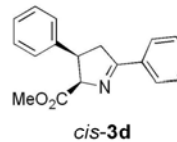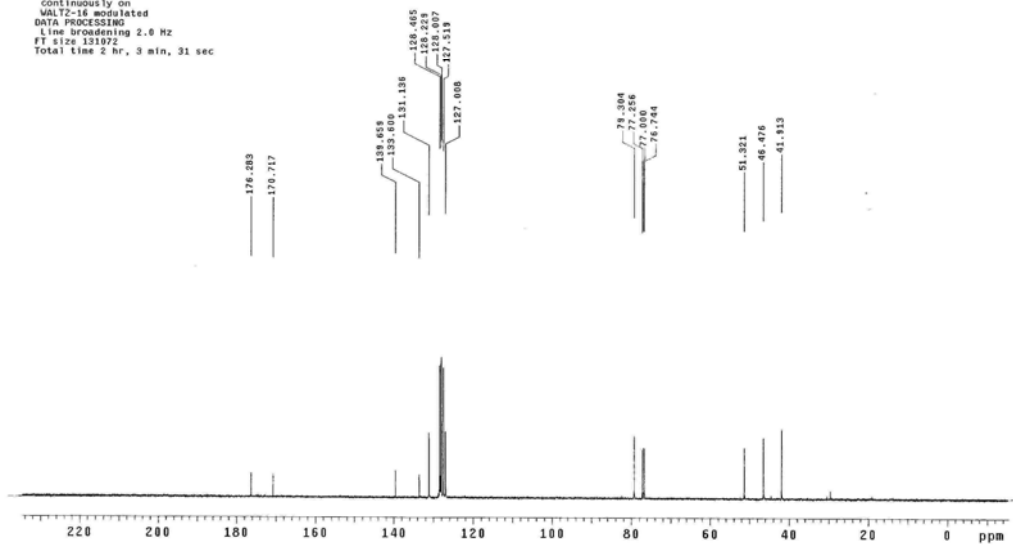

STANDARD PROTON PARAMETERS

Archive directory: /export/home/ouyy/vmrsys/data  
 Sample directory:  
 Pulse Sequence: s2pu1  
 Solvent: CDCl3  
 Ambient temperature  
 File: u300  
 INOVA-500 "NENUS00"  
 Relax. delay 1.000 sec  
 Pulse 45.0 degrees  
 Acq. time 1.892 sec  
 Width 8247.4 Hz  
 8 repetitions  
 OBSERVE H1, 499.8026051 MHz  
 DATA PROCESSING  
 FT size 85538  
 Total time 0 min, 23 sec

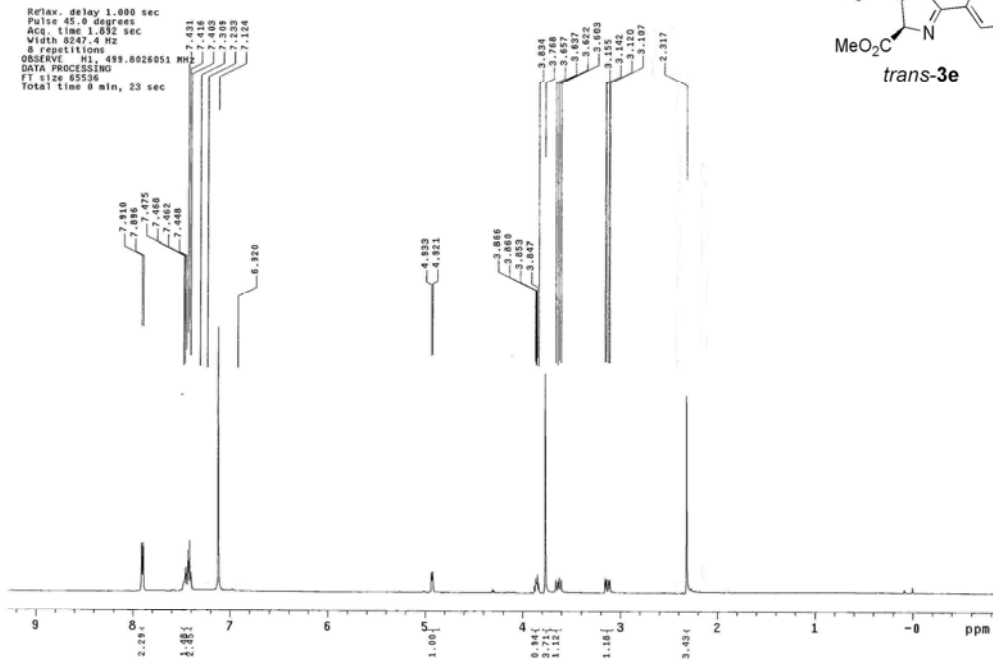

STANDARD CARBON PARAMETERS

Archive directory: /export/home/ouyy/vmrsys/data  
 Sample directory:  
 Pulse Sequence: s2pu1  
 Solvent: CDCl3  
 Ambient temperature  
 User: 3-14-07  
 File: u304  
 INOVA-500 "NENUS00"  
 Relax. delay 0.500 sec  
 Pulse 45.0 degrees  
 Acq. time 1.300 sec  
 Width 31421.8 Hz  
 4896 repetitions  
 OBSERVE C13, 125.6754656 MHz  
 DECOUPLE H1, 499.8050305 MHz  
 Power 42 dB  
 continuous ly on  
 WALTZ-16 modulated  
 DATA PROCESSING  
 Line broadening 2.0 Hz  
 FT size 131072  
 Total time 2 hr, 3 min, 31 sec

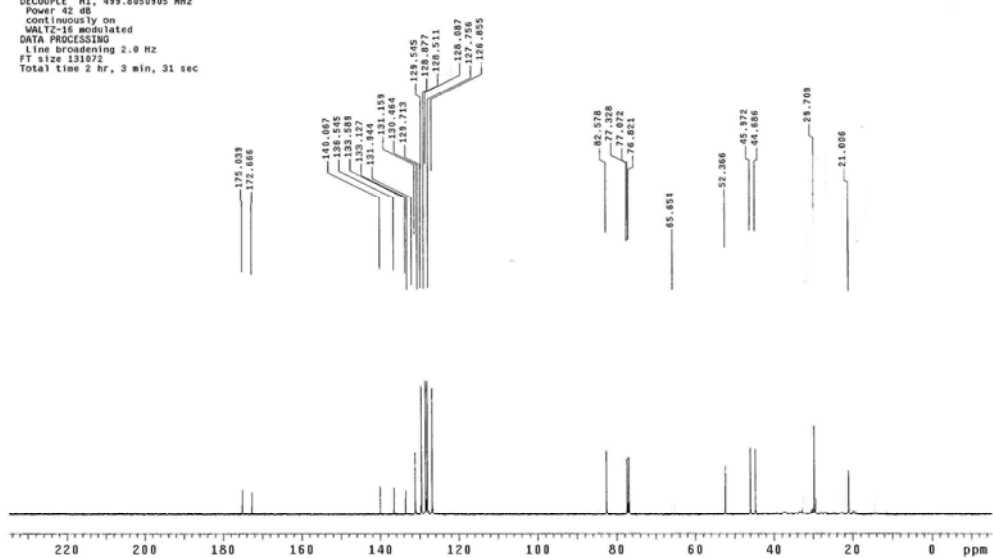





STANDARD PROTON PARAMETERS

Archive directory: /export/home/ouyy/vmr/sys/data  
 Sample directory:  
 Pulse Sequence: s2pu1  
 Solvent: CDCl3  
 Ambient temperature  
 File: v749  
 INOVA-500 "NENU500"  
 Relax. delay 1.000 sec  
 Pulse 45.0 degrees  
 Acq. time 1.895 sec  
 Width 8291.0 Hz  
 8 repetitions  
 OBSERVE H1, 499.8025917 MHz  
 DATA PROCESSING  
 FT size 65536  
 Total time 0 min, 23 sec

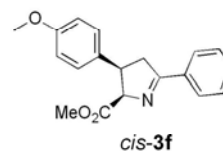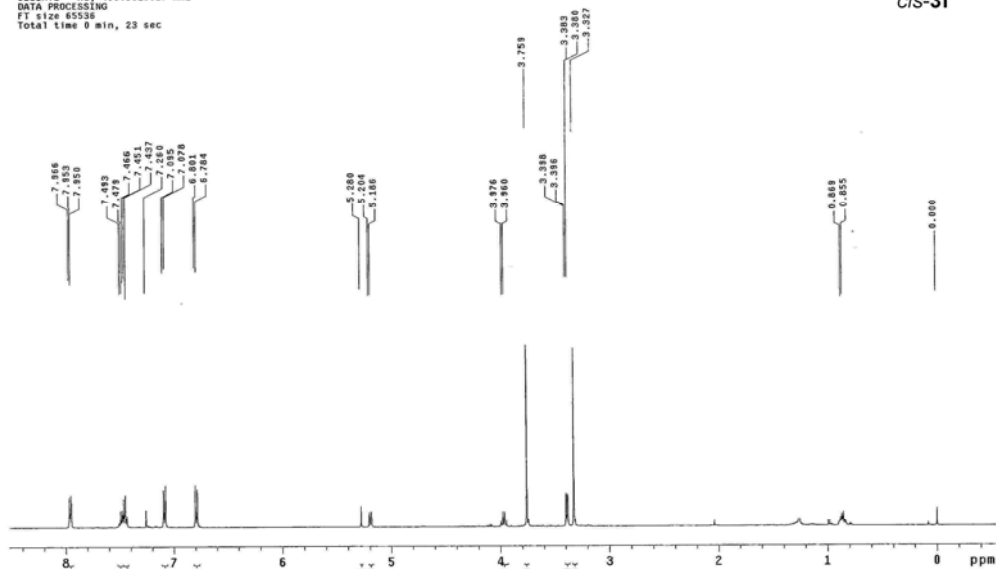

STANDARD CARBON PARAMETERS

Archive directory: /export/home/ouyy/vmr/sys/data  
 Sample directory:  
 Pulse Sequence: s2pu1  
 Solvent: CDCl3  
 Ambient temperature  
 Beer: 1-14-07  
 File: v785  
 INOVA-500 "NENU500"  
 Relax. delay 0.500 sec  
 Pulse 45.0 degrees  
 Acq. time 1.300 sec  
 Width 31421.8 Hz  
 64 repetitions  
 OBSERVE C13, 125.6754666 MHz  
 DECOUPLE H1, 499.8059865 MHz  
 Power 42 dB  
 Continuous by on  
 WALTZ-16 modulated  
 DATA PROCESSING  
 Line broadening 1.5 Hz  
 FT size 131072  
 Total time 2 hr, 3 min, 31 sec

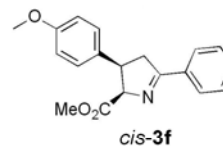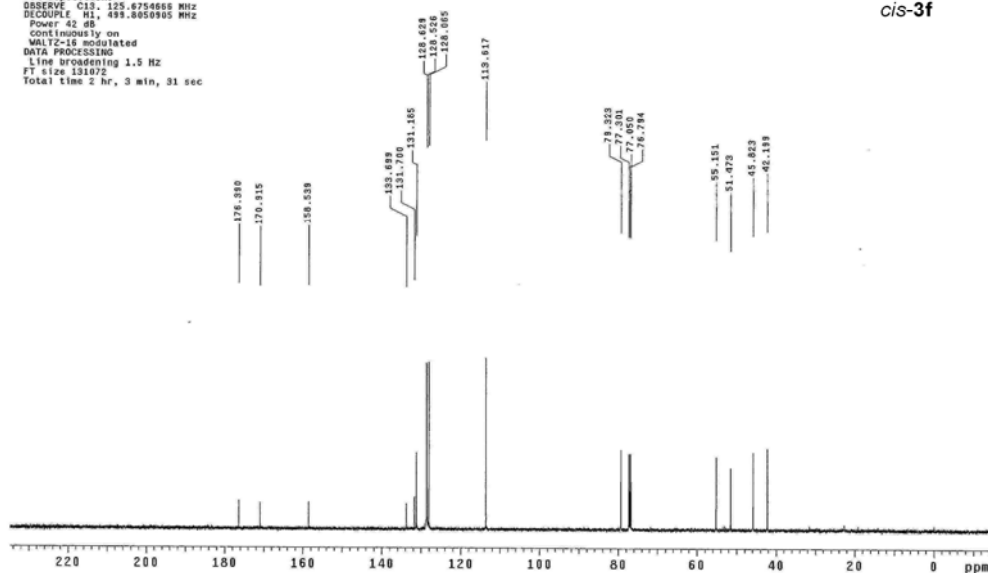

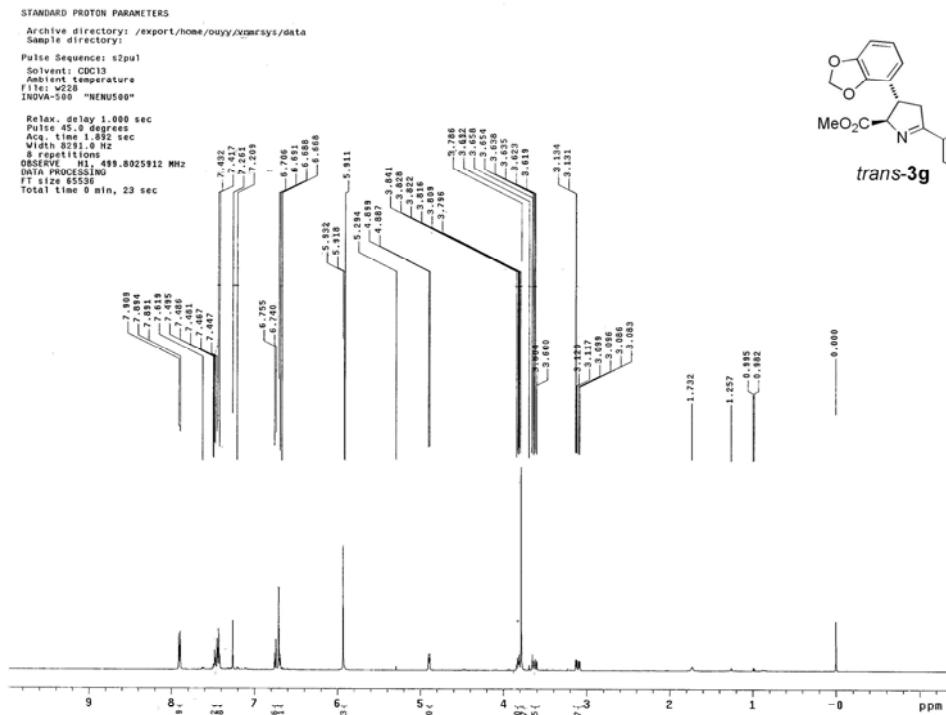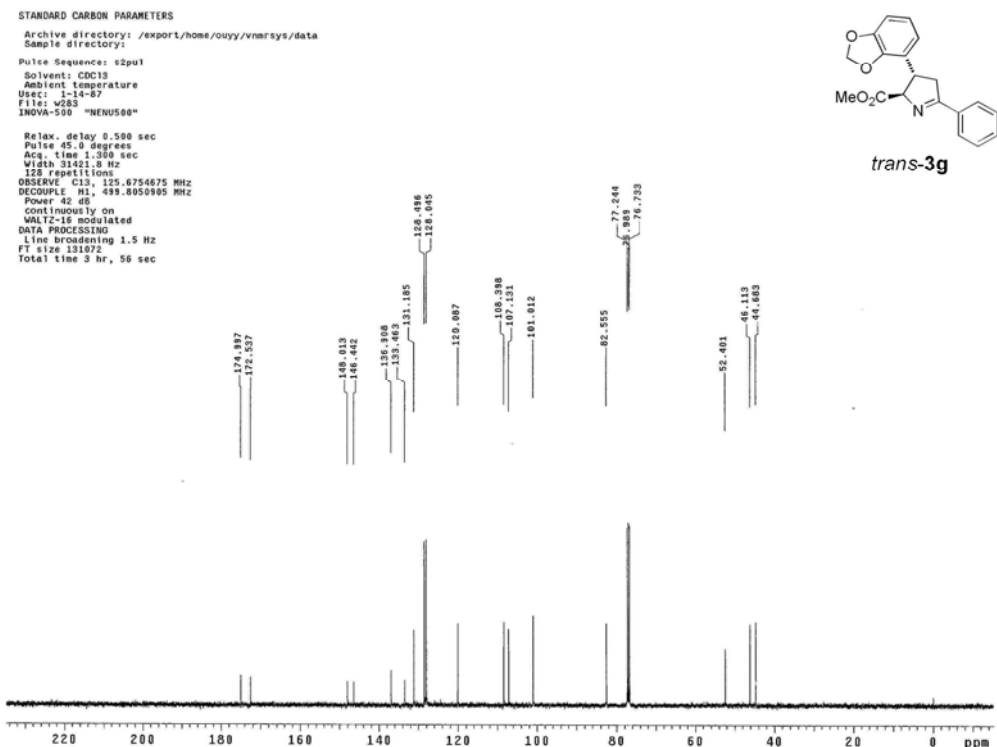

STANDARD PROTON PARAMETERS  
Archive directory: /export/home/oxy/vmrsys/data  
Sample directory:  
Pulse Sequence: s2pu1  
Solvent: CDCl3  
Ambient temperature  
File: u863  
INOVA-500 "MNU500"  
Relax. delay 1.000 sec  
Pulse 45.0 degrees  
Acq. time 1.892 sec  
Width 8247.4 Hz  
8 repetitions  
OBSERVE H1, 499.8025807 MHz  
DATA PROCESSING  
FT size 65536  
Total time 9 min, 23 sec

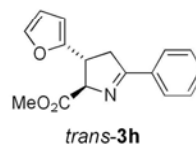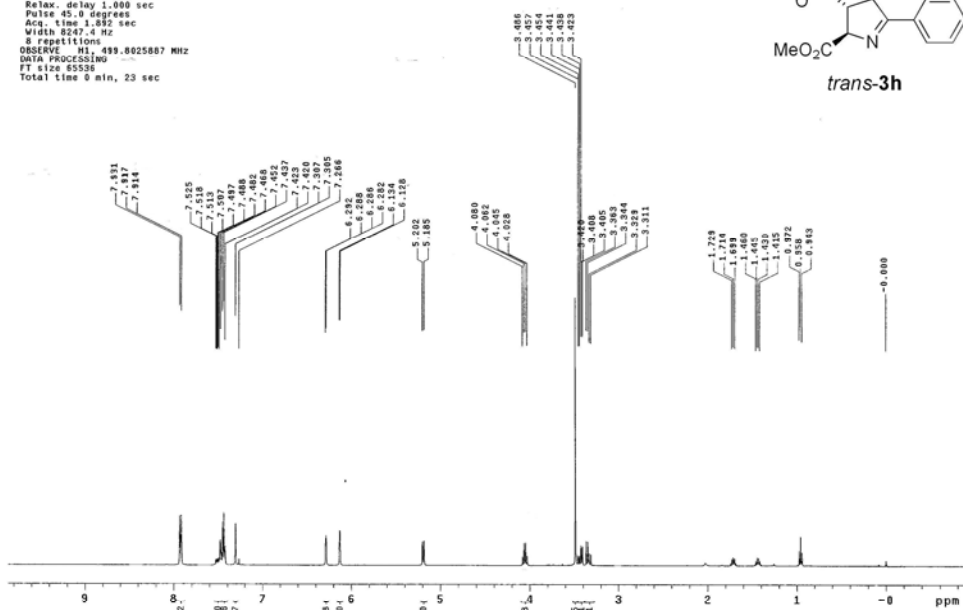

STANDARD CARBON PARAMETERS  
Archive directory: /export/home/oxy/vmrsys/data  
Sample directory:  
Pulse Sequence: s2pu1  
Solvent: CDCl3  
Ambient temperature  
User: 1-14-87  
File: x218  
INOVA-500 "MNU500"  
Relax. delay 0.500 sec  
Pulse 45.0 degrees  
Acq. time 1.390 sec  
Width 31521.8 Hz  
64 repetitions  
OBSERVE C13, 125.6754814 MHz  
DECOUPLE H1, 499.8050905 MHz  
Power 42 dB  
continuously on  
MULTI-18 modulated  
DATA PROCESSING  
Line broadening 1.5 Hz  
FT size 131972  
Total time 3 hr, 56 sec

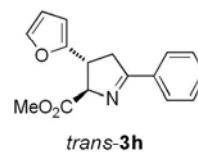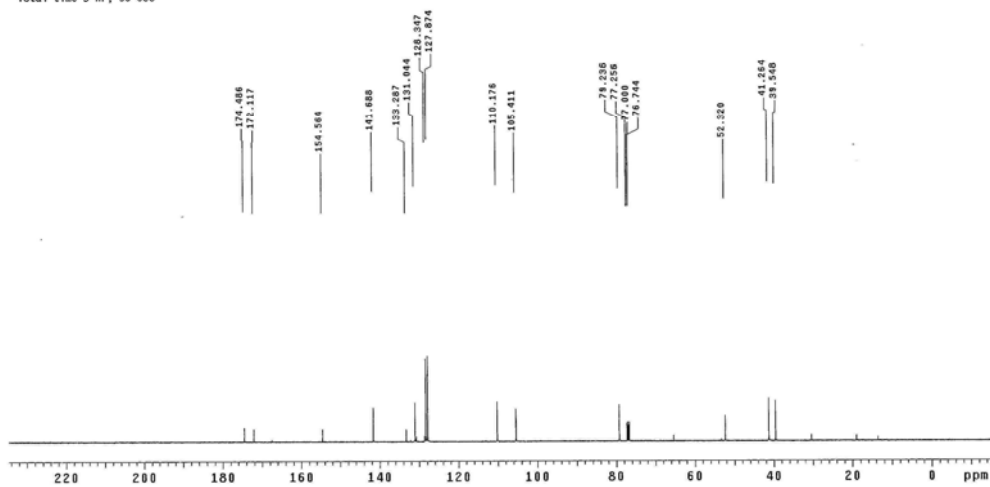

STANDARD PROTON PARAMETERS

Archive directory: /export/home/ouyy/vnmrsvs/data  
 Sample directory:  
 Pulse Sequence: s2pu1  
 Solvent: CDCl3  
 Ambient temperature  
 File: us80  
 INOVA-500 "NENUS00"  
 Relax. delay 1.000 sec  
 Pulse 45.0 degrees  
 Acq. time 1.892 sec  
 Width 8247.4 Hz  
 S repetitions  
 OBSERVE H1, 499.8025900 MHz  
 DATA PROCESSING  
 FT size 85536  
 Total time 0 min, 23 sec

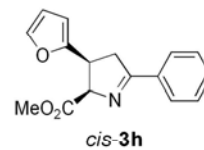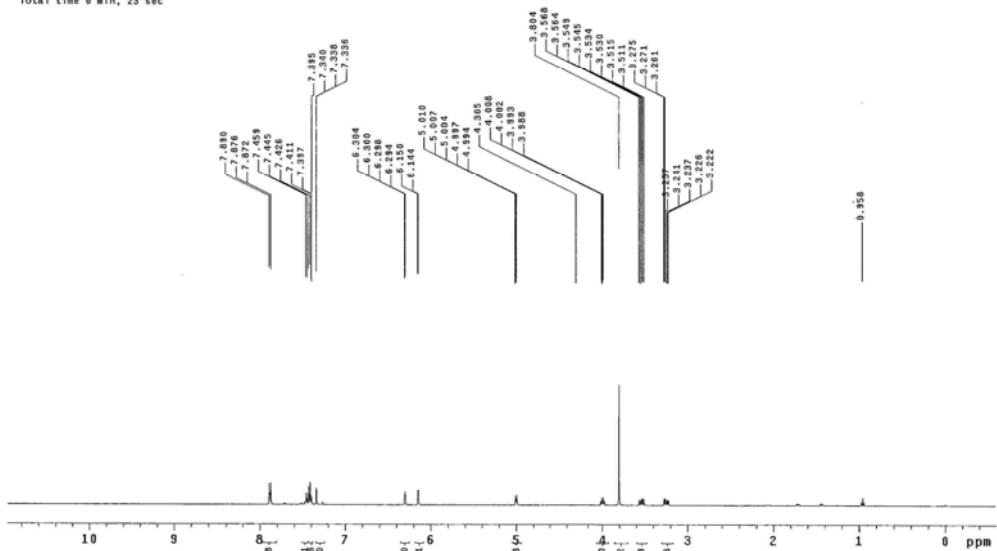

STANDARD CARBON PARAMETERS

Archive directory: /export/home/ouyy/vnmrsvs/data  
 Sample directory:  
 Pulse Sequence: s2pu1  
 Solvent: CDCl3  
 Ambient temperature  
 User: 1-14-87  
 File: x210  
 INOVA-500 "NENUS00"  
 Relax. delay 0.500 sec  
 Pulse 45.0 degrees  
 Acq. time 1.300 sec  
 Width 31421.8 Hz  
 120 repetitions  
 OBSERVE C13, 125.6754703 MHz  
 DECOUPLE H1, 499.8050905 MHz  
 Power: 42 db  
 continuously on  
 MLI2-16 modulated  
 DATA PROCESSING  
 Line broadening 1.5 Hz  
 FT size 131072  
 Total time 3 hr, 56 sec

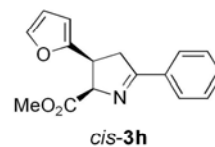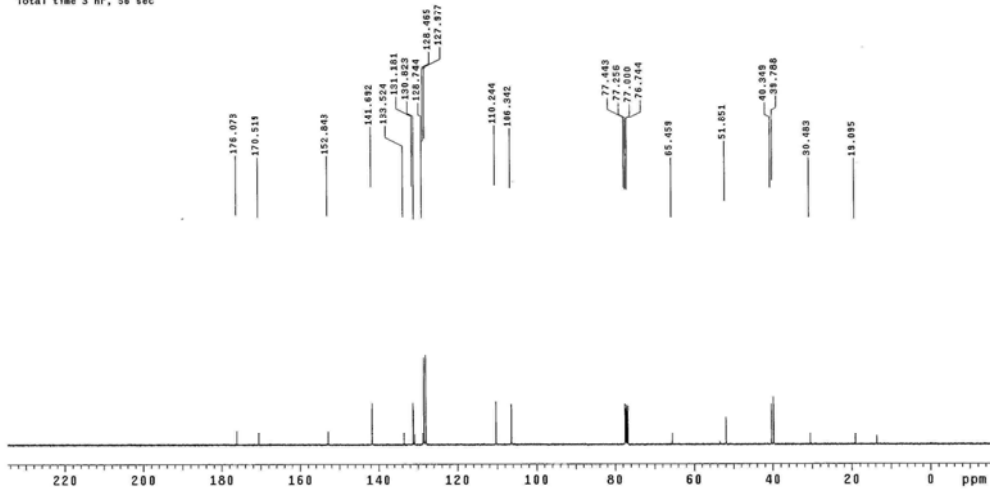

STANDARD PROTON PARAMETERS

Archive directory: /export/home/ouyy/vmrsys/data  
 Sample directory:  
 Pulse Sequence: s2pul  
 Solvent: CDCl3  
 Ambient temperature  
 File: u313  
 INOVA-500 "NEMUS00"  
 Relax. delay 1.000 sec  
 Pulse 45.0 degrees  
 Acq. time 1.852 sec  
 Width 8247.4 Hz  
 S repetitions  
 OBSERVE H1 499.8026056 MHz  
 DATA PROCESSING  
 FT size 85536  
 Total time 0 min, 23 sec

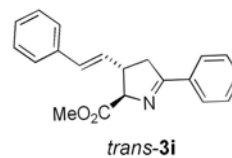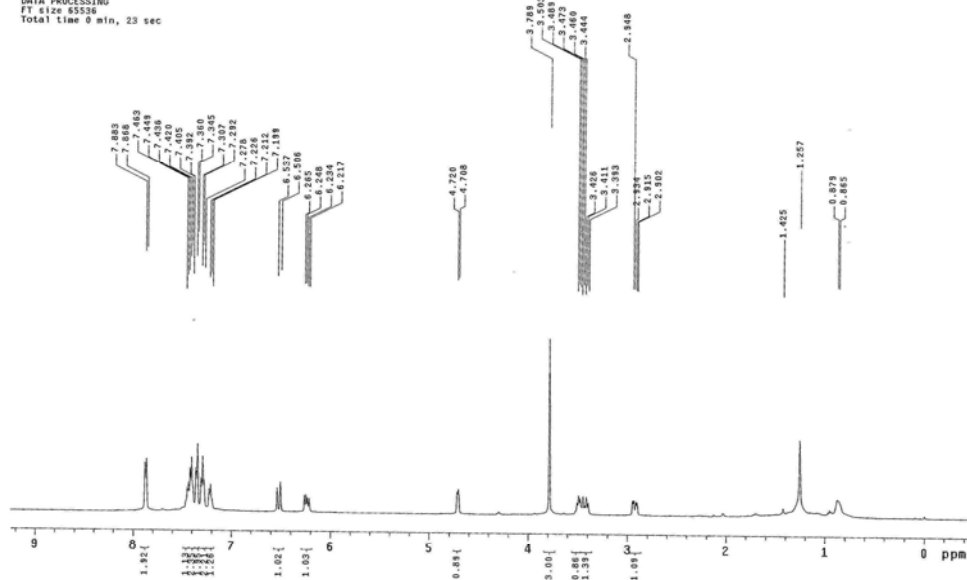

STANDARD CARBON PARAMETERS

Archive directory: /export/home/ouyy/vmrsys/data  
 Sample directory:  
 Pulse Sequence: s2pul  
 Solvent: CDCl3  
 Ambient temperature  
 User: 1-14-87  
 File: u314  
 INOVA-500 "NEMUS00"  
 Relax. delay 0.500 sec  
 Pulse 45.0 degrees  
 Acq. time 1.300 sec  
 Width 31421.8 Hz  
 4096 repetitions  
 OBSERVE C13 125.8254656 MHz  
 DECOUPLE H1 499.8059905 MHz  
 Power 42 dB  
 continuously on  
 WALTZ-16 modulated  
 DATA PROCESSING  
 line broadening 2.0 Hz  
 FT size 131072  
 Total time 2 hr, 3 min, 31 sec

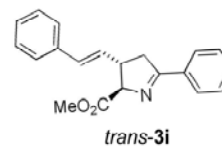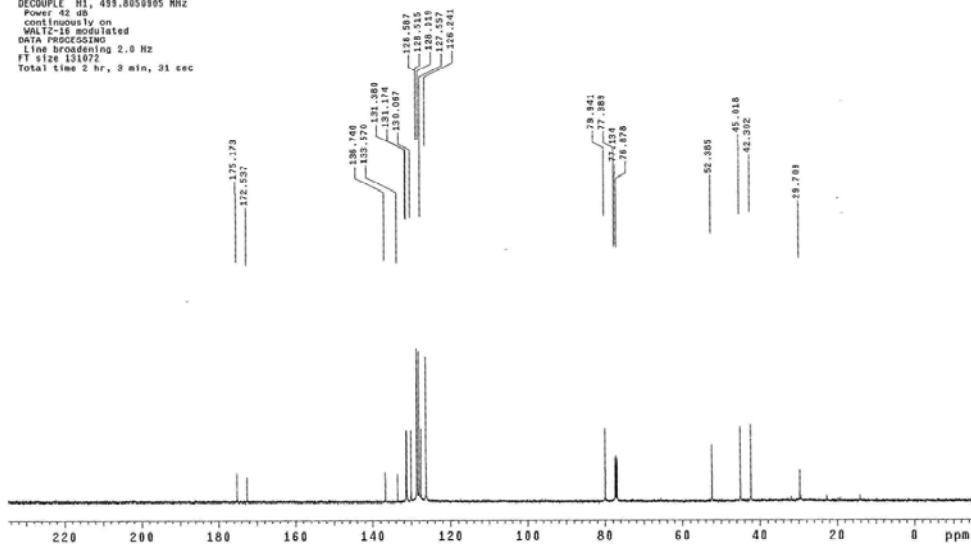

STANDARD PROTON PARAMETERS

Archive directory: /export/home/ouyy/vnmrsys/data  
 Sample directory:  
 Pulse Sequence: s2pu1  
 Solvent: CDCl3  
 Ambient temperature  
 File: u445  
 INOVA-500 "NENU500"  
 Relax. delay 1.000 sec  
 Pulse 45.0 degrees  
 Acq. time 1.882 sec  
 Width 8247.4 Hz  
 8 repetitions  
 OBSERVE H1, 499.8025963 MHz  
 DATA PROCESSING  
 FT size 65536  
 Total time 0 min, 23 sec

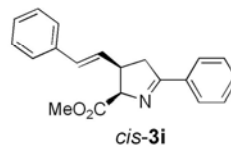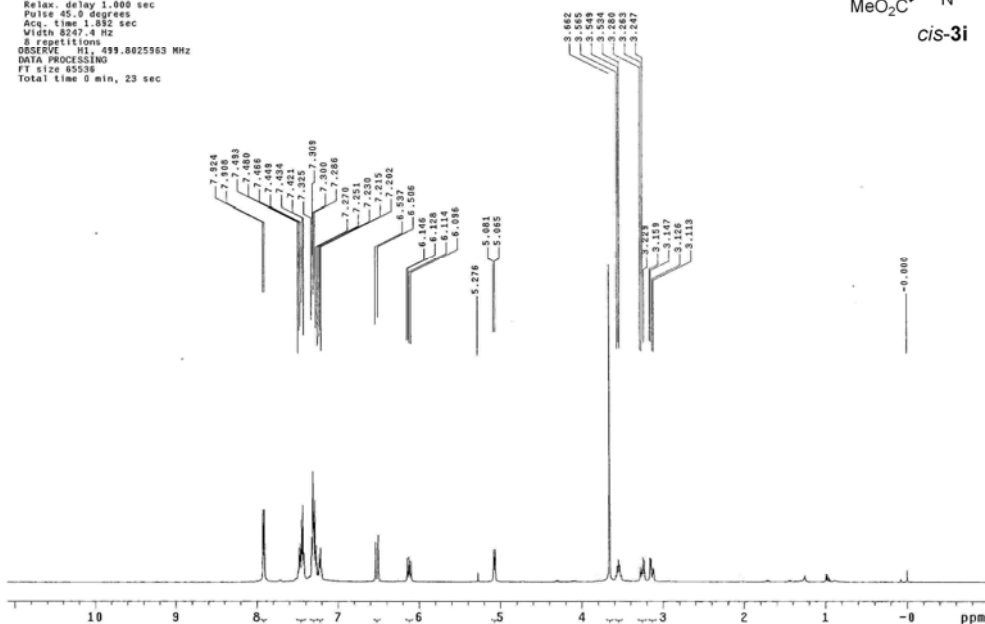

STANDARD CARBON PARAMETERS

Archive directory: /export/home/ouyy/vnmrsys/data  
 Sample directory:  
 Pulse Sequence: s2pu1  
 Solvent: CDCl3  
 Ambient temperature  
 User: 1-14-87  
 File: u469  
 INOVA-500 "NENU500"  
 Relax. delay 0.500 sec  
 Pulse 45.0 degrees  
 Acq. time 1.360 sec  
 Width 31421.8 Hz  
 128 repetitions  
 OBSERVE C13, 125.8754714 MHz  
 DECOUPLE H1, 499.8050505 MHz  
 Power 42 dB  
 continuously on  
 WALTZ-16 modulated  
 DATA PROCESSING  
 Line broadening 1.5 Hz  
 FT size 131072  
 Total time 2 hr, 3 min, 31 sec

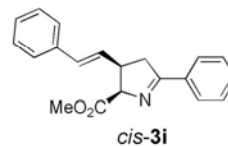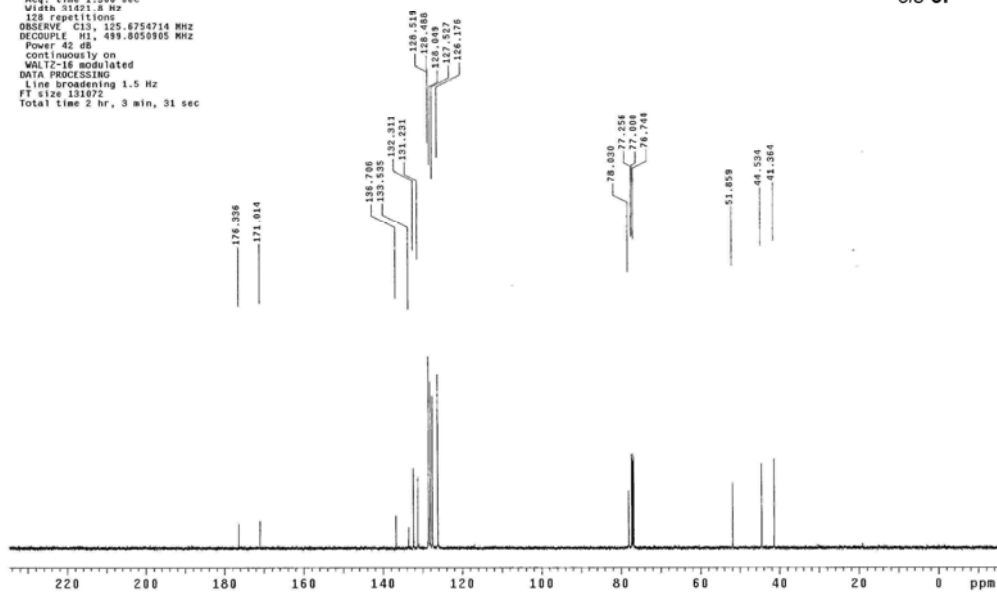

STANDARD PROTON PARAMETERS

Archive directory: /export/home/ouyy/vnmrsys/data  
Sample directory:

Pulse Sequence: s2pu1

Solvent: CDCl3

Ambient temperature

File: v875

INNOVA-500 "MNU500"

Relax. delay 1.000 sec

Pulse 45.0 degrees

Acq. time 1.082 sec

Width 8291.0 Hz

0 repetitions

OBSERVE H1, 499.8025766 MHz

DATA PROCESSING

FT size 65536

Total time 0 min, 23 sec

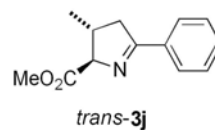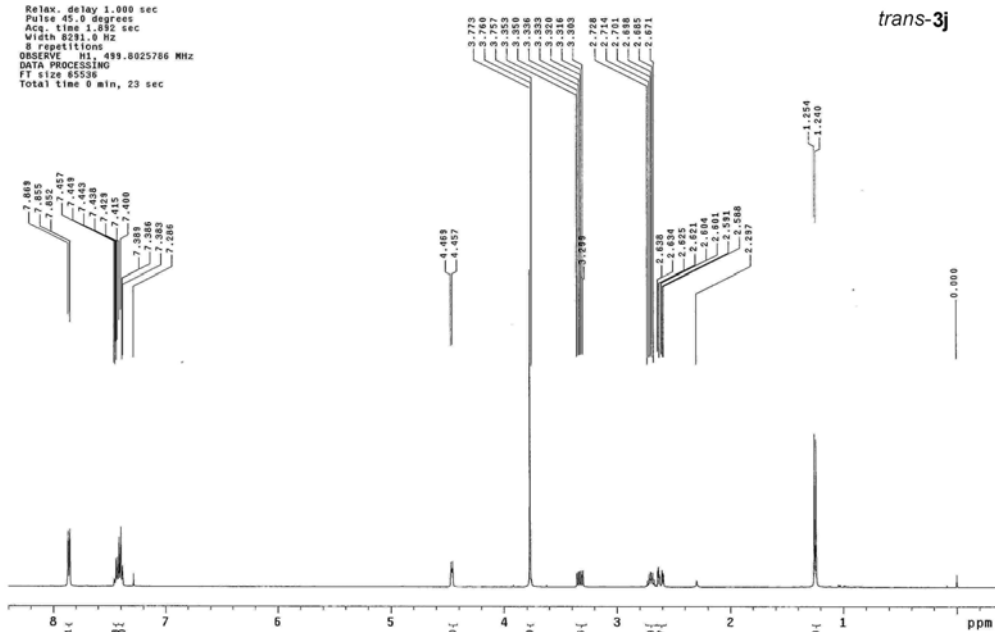

STANDARD CARBON PARAMETERS

Archive directory: /export/home/ouyy/vnmrsys/data  
Sample directory:

Pulse Sequence: s2pu1

Solvent: CDCl3

Ambient temperature

File: v875

INNOVA-500 "MNU500"

Relax. delay 0.500 sec

Pulse 45.0 degrees

Acq. time 1.308 sec

Width 31421.0 Hz

6000 repetitions

OBSERVE C13, 125.6754805 MHz

DECOUPLE H1, 499.8050905 MHz

Power 42.00

continuously on

MULTI-16 modulated

DATA PROCESSING

Line broadening 1.5 Hz

FT size 131972

Total time 3 hr, 56 sec

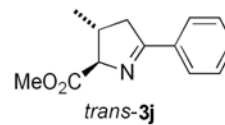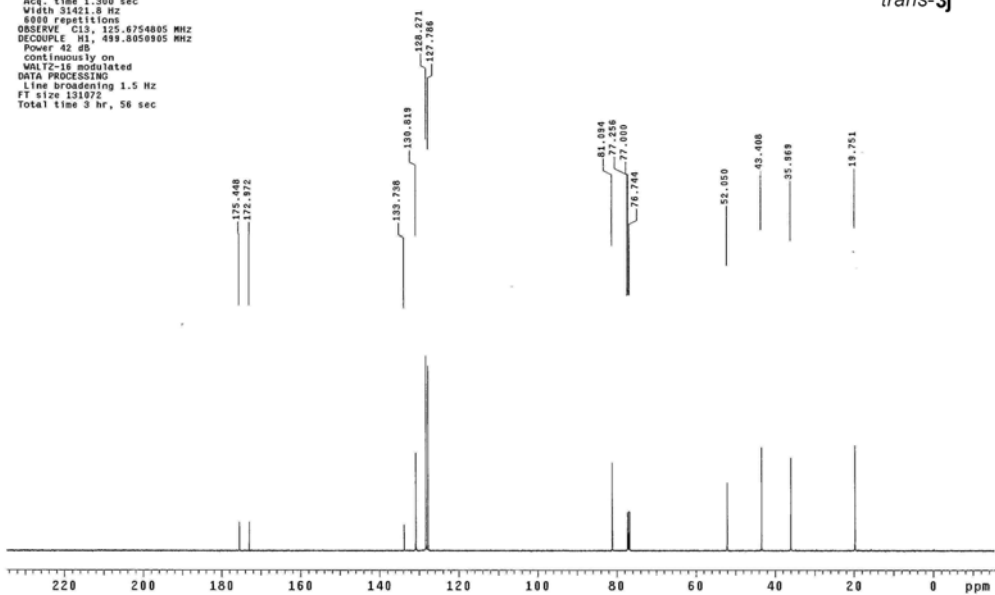

STANDARD PROTON PARAMETERS

Archive directory: /export/home/ouyy/vnmrsys/data  
 Sample directory:

Pulse Sequence: s2pu1  
 Solvent: CDCl3  
 Ambient temperature  
 File: v376  
 INOVA-500 "MREUS00"

Relax. delay 1.000 sec  
 Pulse 45.0 degrees  
 Acq. time 1.932 sec  
 Width 8291.0 Hz  
 8 repetitions  
 OBSERVE W1, 499.8025854 MHz  
 DATA PROCESSING  
 FT size 65536  
 Total time 0 min, 23 sec

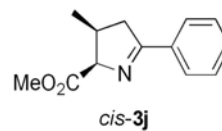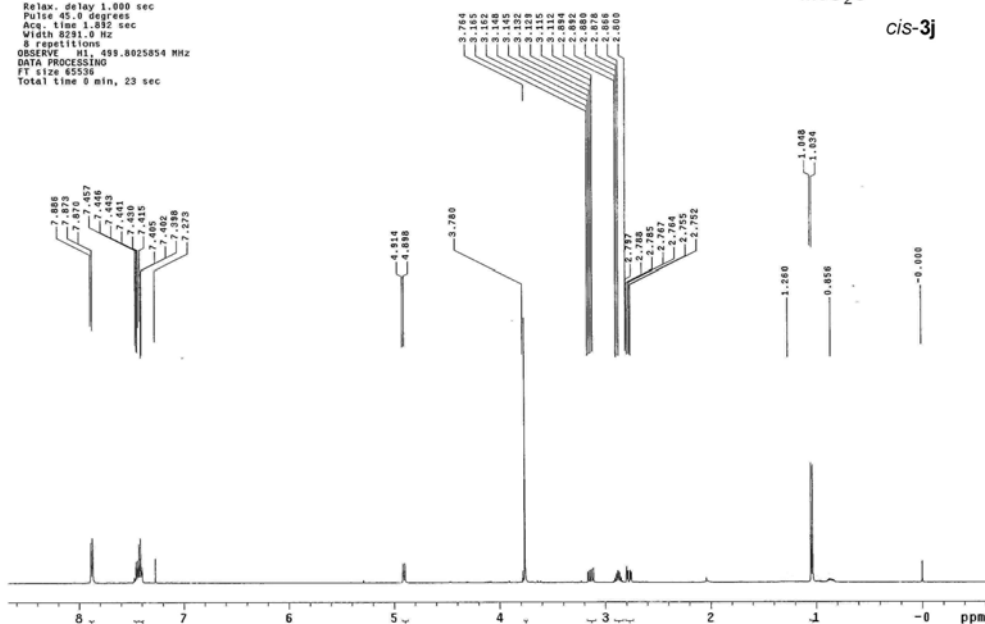

STANDARD CARBON PARAMETERS

Archive directory: /export/home/ouyy/vnmrsys/data  
 Sample directory:

Pulse Sequence: s2pu1  
 Solvent: CDCl3  
 Ambient temperature  
 User: 1-14-87  
 File: v393  
 INOVA-500 "MREUS00"

Relax. delay 0.500 sec  
 Pulse 45.0 degrees  
 Acq. time 1.300 sec  
 Width 31421.8 Hz  
 64 repetitions  
 OBSERVE C13, 125.6754769 MHz  
 DECOUPLE W1, 499.8050905 MHz  
 Power 42 dB  
 continuous ly on  
 MILTZ-18 modulated  
 DATA PROCESSING  
 Line broadening 1.5 Hz  
 FT size 131072  
 Total time 3 hr, 56 sec

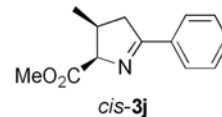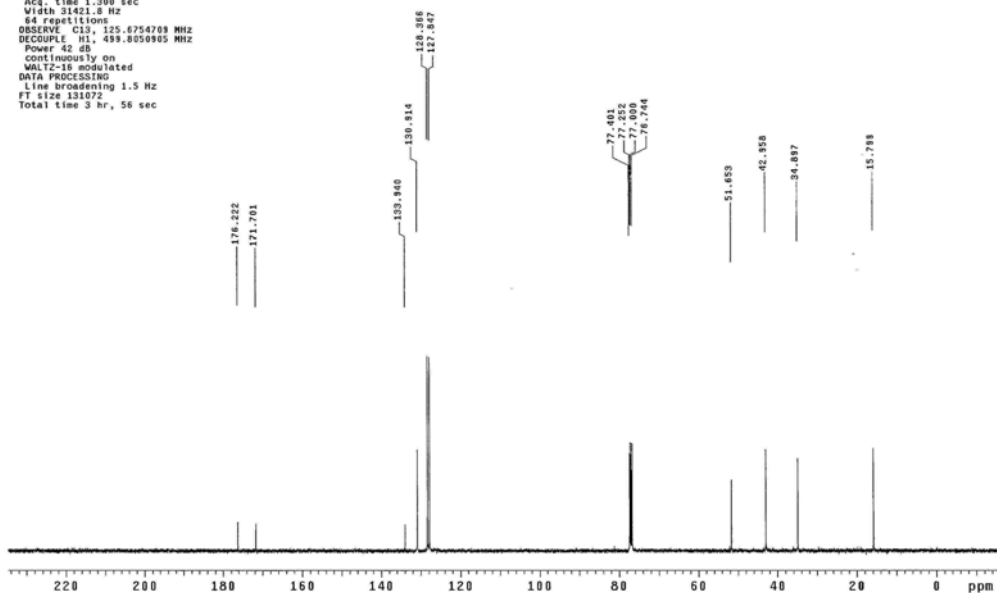



STANDARD PROTON PARAMETERS

Archive directory: /export/home/ouyy/vnmrSYS/data  
Sample directory:  
Pulse Sequence: s2pu1  
Solvent: CDCl3  
Ambient temperature  
File: v679  
INOVA-500 "NENU500"  
Relax. delay 1.000 sec  
Pulse 45.0 degrees  
Acq. time 1.892 sec  
Width 8291.0 Hz  
8 repetitions  
OBSERVE H1, 499.8025862 MHz  
DATA PROCESSING  
FT size 65536  
Total time 8 min, 23 sec

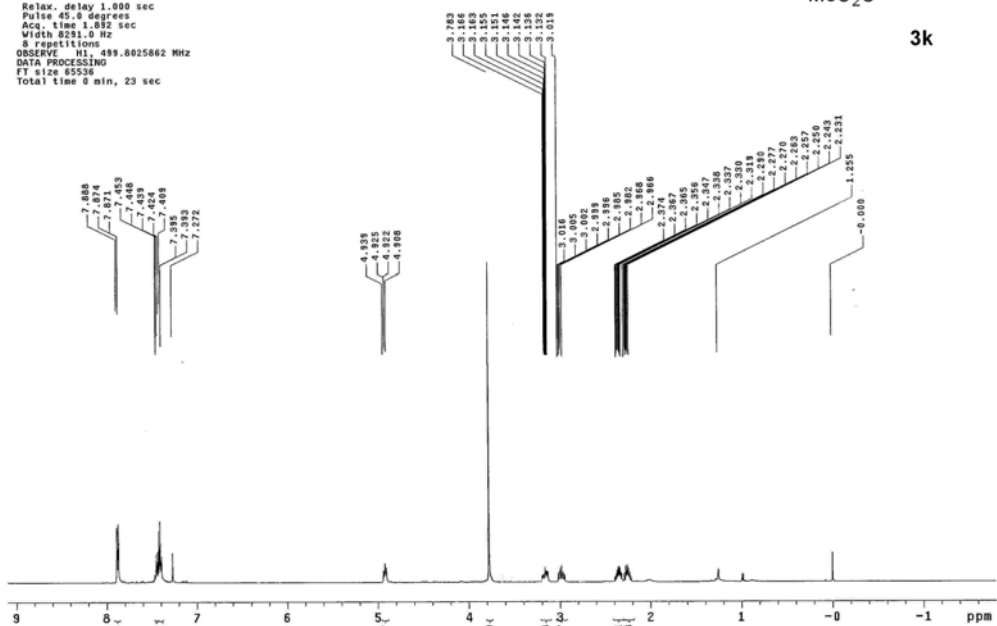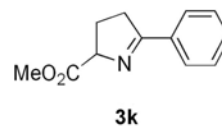

STANDARD CARBON PARAMETERS

Archive directory: /export/home/ouyy/vnmrSYS/data  
Sample directory:  
Pulse Sequence: s2pu1  
Solvent: CDCl3  
Ambient temperature  
Users: 1-14-87  
File: v681  
INOVA-500 "NENU500"  
Relax. delay 0.500 sec  
Pulse 45.0 degrees  
Acq. time 1.290 sec  
Width 31421.9 Hz  
4896 repetitions  
OBSERVE C13, 125.6754642 MHz  
DECOUPLE H1, 499.8058905 MHz  
Power 42 dB  
continuously on  
MULTI-16 modulated  
DATA PROCESSING  
Line broadening 1.5 Hz  
FT size 131072  
Total time 2 hr, 3 min, 31 sec

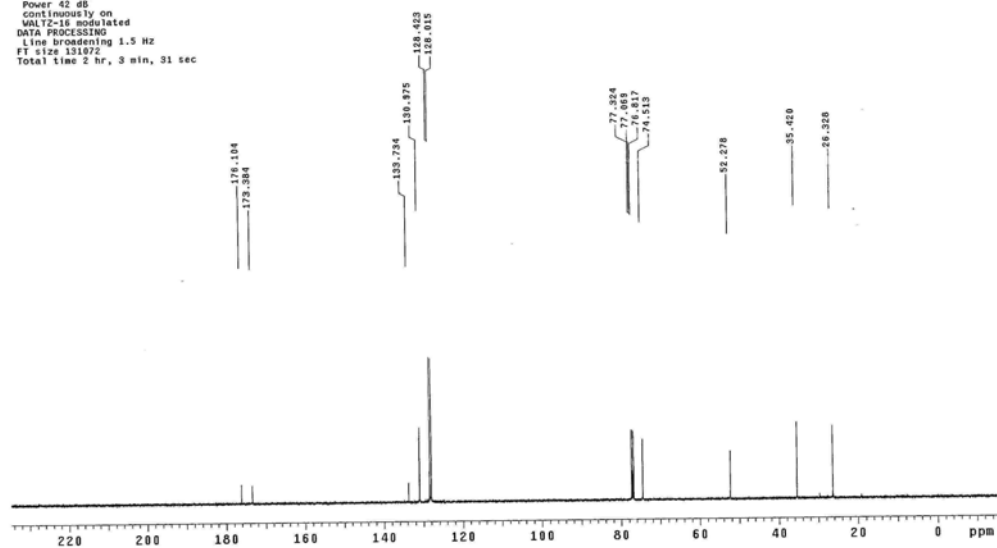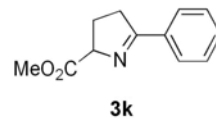

STANDARD PROTON PARAMETERS

Archive directory: /export/home/ouyy/vnmrsvs/data  
Sample directory:  
Pulse Sequence: s2pul1  
Solvent: CDCl3  
Ambient temperature  
File: w357  
INOVA-500 "NENU500"  
Relax. delay 1.000 sec  
Pulse 45.0 degrees  
Acq. time 1.052 sec  
Width 8291.0 Hz  
0 repetitions  
OBSERVE H1, 499.8025915 MHZ  
DATA PROCESSING  
FT size 65338  
Total time 0 min, 23 sec

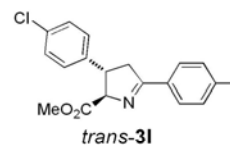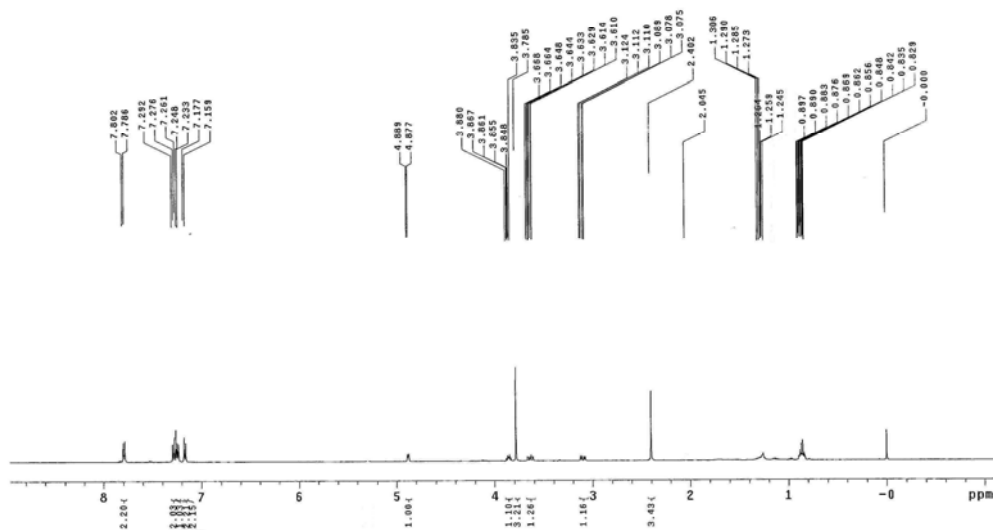

STANDARD CARBON PARAMETERS

Archive directory: /export/home/ouyy/vnmrsvs/data  
Sample directory:  
Pulse Sequence: s2pul1  
Solvent: CDCl3  
Ambient temperature  
User: 1-14-07  
File: w357  
INOVA-500 "NENU500"  
Relax. delay 0.500 sec  
Pulse 45.0 degrees  
Acq. time 1.300 sec  
Width 31421.8 Hz  
320 repetitions  
OBSERVE C13, 125.6754632 MHZ  
DECOUPLE H1, 499.8050905 MHZ  
Power 42 db  
continuously on  
MALTZ=16 modulated  
DATA PROCESSING  
Line broadening 1.5 Hz  
FT size 131972  
Total time 3 hr, 56 sec

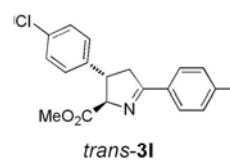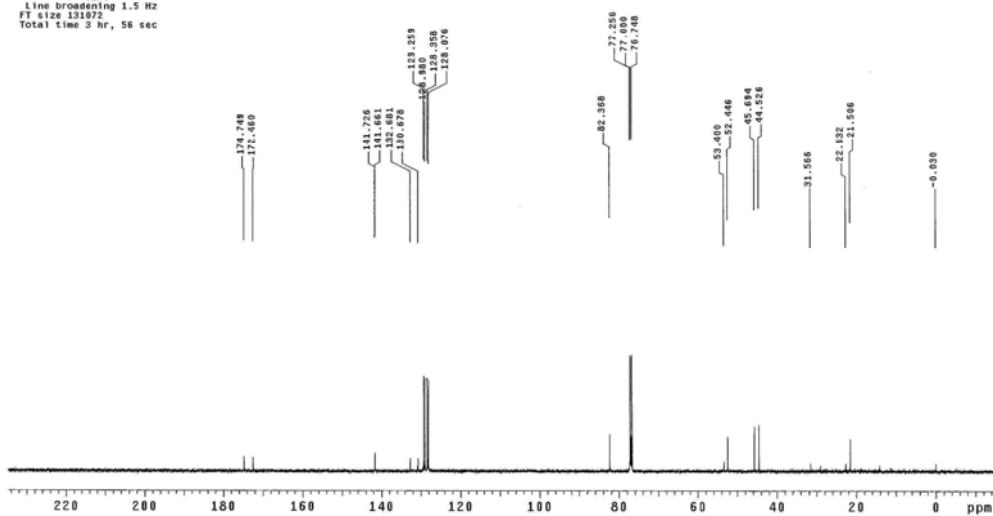

STANDARD PROTON PARAMETERS

Archive directory: /export/home/ouyy/vnmrsys/data  
 Sample directory:  
 Pulse Sequence: s2pul  
 Solvent: CDCl3  
 Ambient temperature  
 File: w355  
 INOVA-500 "MENV500"  
 Relax. delay 1.000 sec  
 Pulse 45.0 degrees  
 Acq. time 1.832 sec  
 Width 8291.0 Hz  
 8 repetitions  
 OBSERVE H1, 499.8025917 MHz  
 DATA PROCESSING  
 FT size 43338  
 Total time 0 min, 23 sec

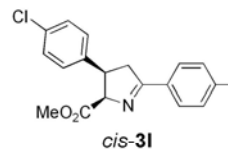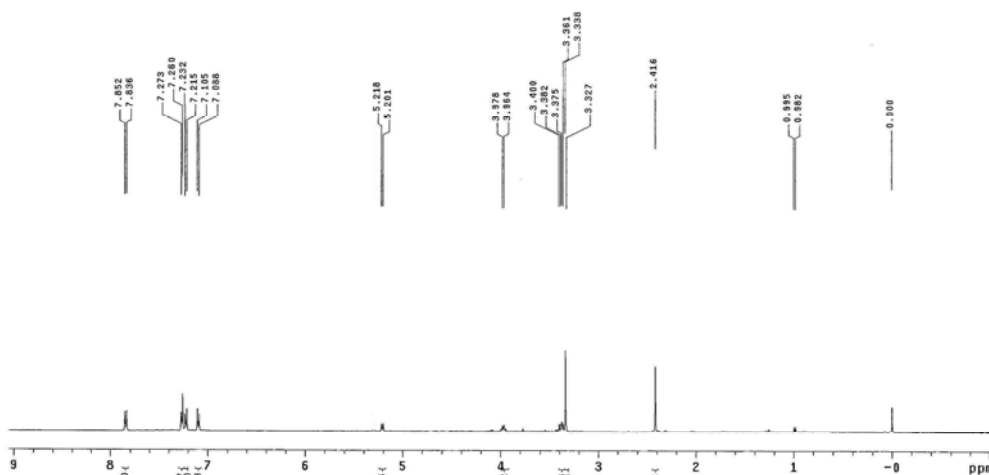

STANDARD CARBON PARAMETERS

Archive directory: /export/home/ouyy/vnmrsys/data  
 Sample directory:  
 Pulse Sequence: s2pul  
 Solvent: CDCl3  
 Ambient temperature  
 User: i-16-87  
 File: w385  
 INOVA-500 "MENV500"  
 Relax. delay 0.500 sec  
 Pulse 45.0 degrees  
 Acq. time 1.380 sec  
 Width 21421.0 Hz  
 1280 repetitions  
 OBSERVE C13, 125.6754602 MHz  
 DECOUPLE H1, 499.8050903 MHz  
 Power 42 dB  
 continuously on  
 WALTZ-16 modulated  
 DATA PROCESSING  
 Line broadening 1.5 Hz  
 FT size 131072  
 Total time 4 hr, 1 min, 14 sec

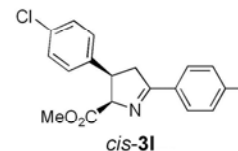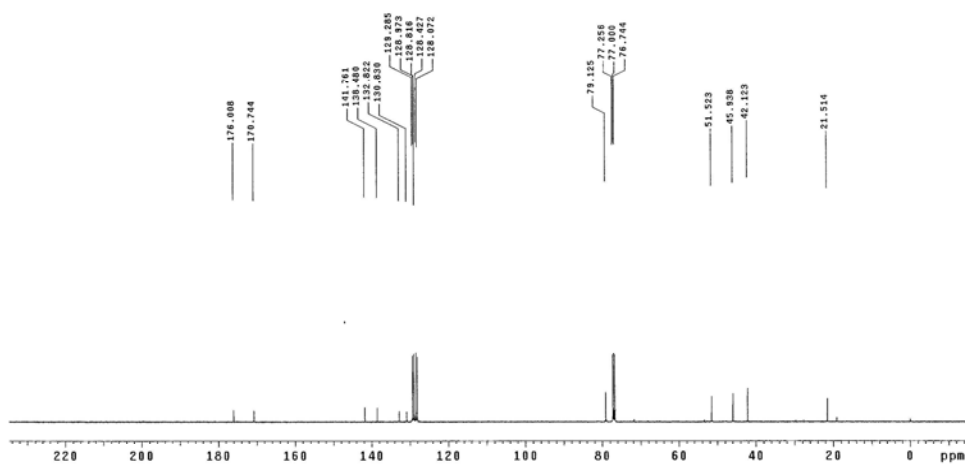

STANDARD PROTON PARAMETERS

Archive directory: /export/home/ouyy/vnmrsys/data  
 Sample directory:  
 Pulse Sequence: s2pu1  
 Solvent: CDCl3  
 Ambient temperature  
 File: w331  
 INOVA-500 "MNU500"  
 Relax. delay 1.000 sec  
 Pulse 45.0 degrees  
 Acq. time 1.082 sec  
 Width 8281.0 Hz  
 8 repetitions  
 OBSERVE H1, 499.8025897 MHz  
 DATA PROCESSING  
 FT size 65536  
 Total time 0 min, 23 sec

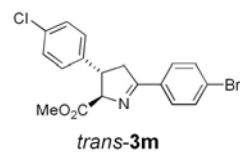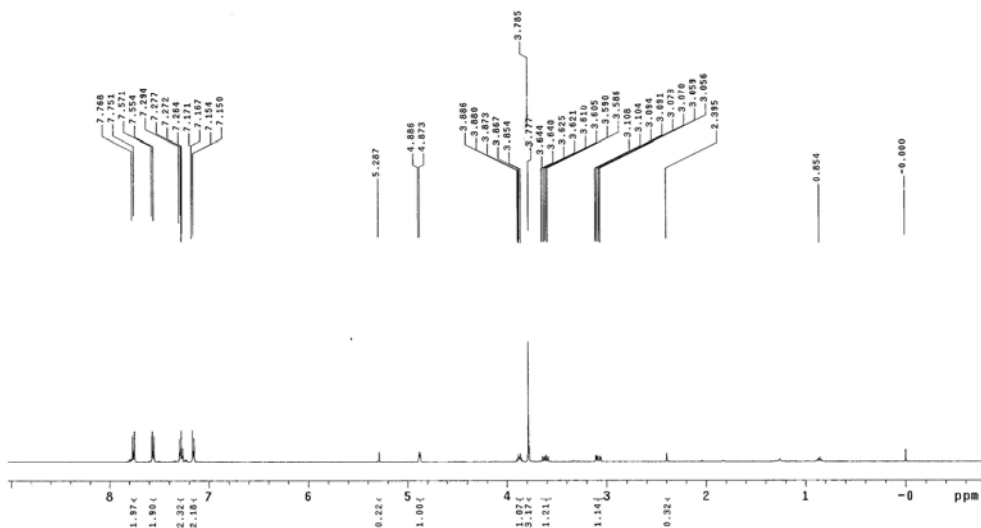

STANDARD CARBON PARAMETERS

Archive directory: /export/home/ouyy/vnmrsys/data  
 Sample directory:  
 Pulse Sequence: s2pu1  
 Solvent: CDCl3  
 Ambient temperature  
 User: 1-14-07  
 File: w358  
 INOVA-500 "MNU500"  
 Relax. delay 0.500 sec  
 Pulse 45.0 degrees  
 Acq. time 1.200 sec  
 Width 31421.0 Hz  
 128 repetitions  
 OBSERVE C13, 125.8754632 MHz  
 DECOUPLE H1, 499.8050905 MHz  
 Power 42 dB  
 continuously on  
 MALTZ-18 modulated  
 DATA PROCESSING  
 Line broadening 1.5 Hz  
 FT size 131072  
 Total time 3 hr, 56 sec

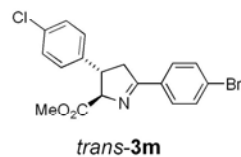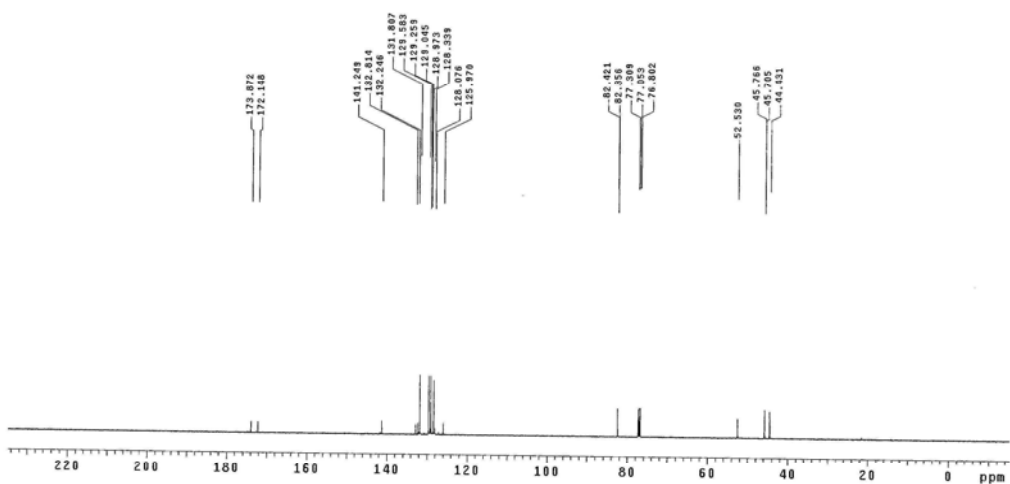

STANDARD PROTON PARAMETERS

Archive directory: /export/home/ouyy/vmrsys/data  
Sample directory:  
Pulse Sequence: s2pul  
Solvent: CDCl3  
Ambient temperature  
File: w556  
INOVA-500 "NENUS00"  
Relax. delay 1.000 sec  
Pulse 45.0 degrees  
Acq. time 1.552 sec  
Width 8251.0 Hz  
S repetitions  
OBSERVE H1, 499.8025910 MHz  
DATA PROCESSING  
FT size 65536  
Total time 0 min, 23 sec

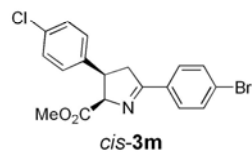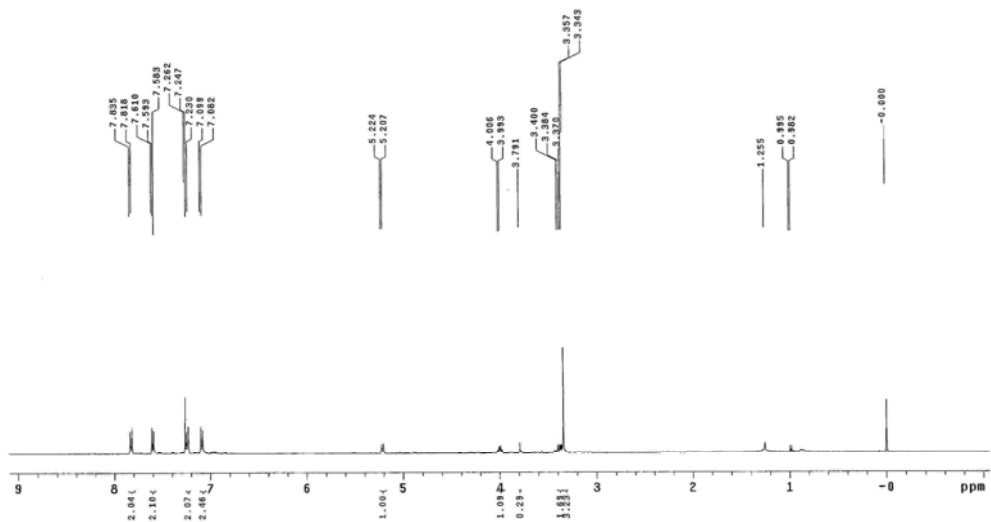

STANDARD CARBON PARAMETERS

Archive directory: /export/home/ouyy/vmrsys/data  
Sample directory:  
Pulse Sequence: s2pul  
Solvent: CDCl3  
Ambient temperature  
User: 1-14-07  
File: w557  
INOVA-500 "NENUS00"  
Relax. delay 0.500 sec  
Pulse 45.0 degrees  
Acq. time 1.300 sec  
Width 31421.8 Hz  
S repetitions  
OBSERVE C13, 125.6754632 MHz  
DECOUPLE H1, 499.8050105 MHz  
Power 42 dB  
continuously on  
WALTZ-16 modulated  
DATA PROCESSING  
Line broadening 1.5 Hz  
FT size 131072  
Total time 3 hr, 56 sec

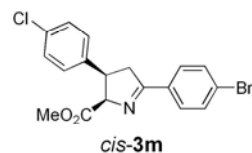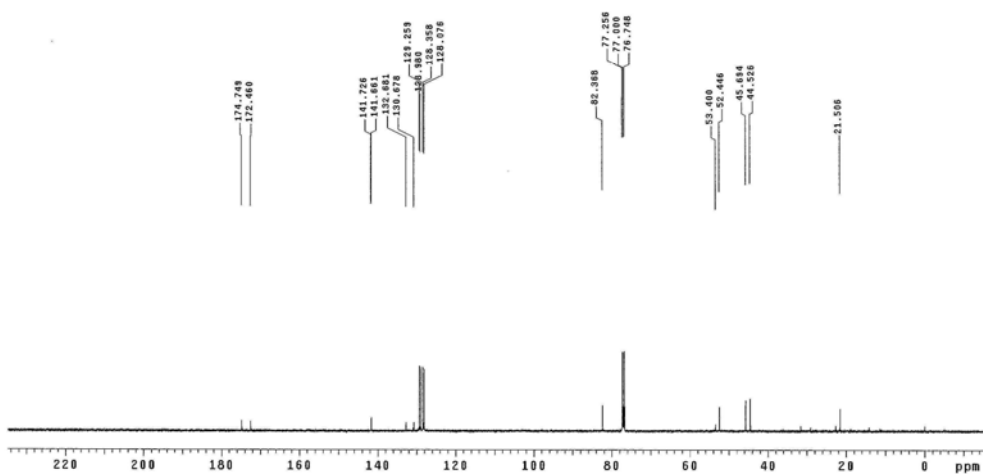

STANDARD PROTON PARAMETERS

Archive directory: /export/home/ouyy/vnmrsys/data  
 Sample directory:  
 Pulse Sequence: s2pul  
 Solvent: CDCl3  
 Ambient temperature  
 File: c004  
 INOVA-500 "NENU500"  
 Relax. delay 1.000 sec  
 Pulse 45.0 degrees  
 Acq. time 1.892 sec  
 Width 8247.4 Hz  
 8 repetitions  
 OBSERVE H1 499.8025751 MHz  
 DATA PROCESSING  
 FT size 65536  
 Total time 0 min, 23 sec

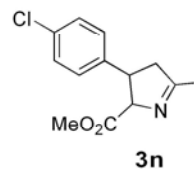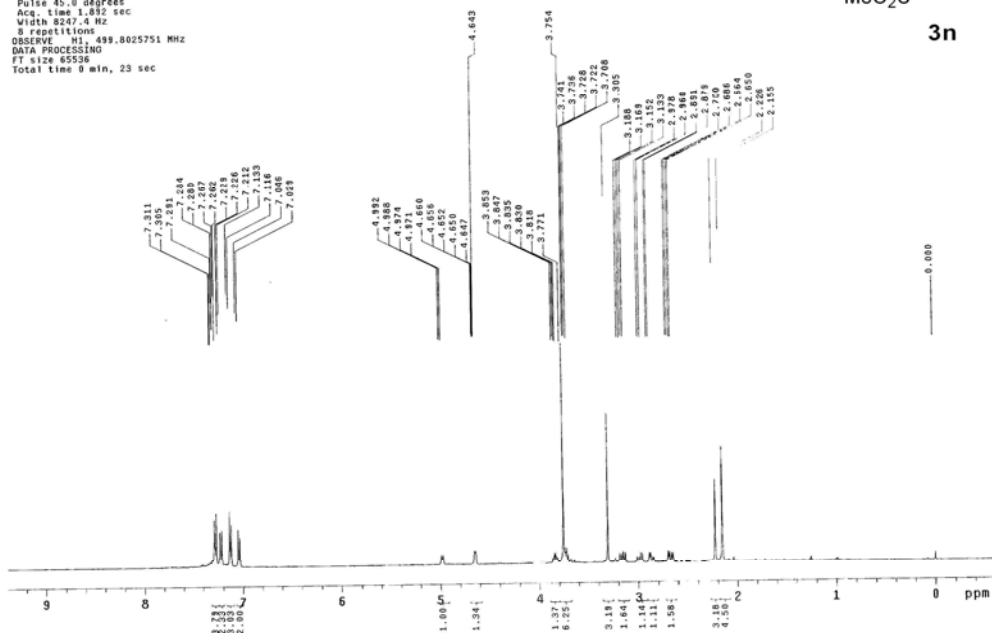

STANDARD CARBON PARAMETERS

Archive directory: /export/home/ouyy/vnmrsys/data  
 Sample directory:  
 Pulse Sequence: s2pul  
 Solvent: c6d6  
 Ambient temperature  
 User: 1-14-07  
 File: c064  
 INOVA-500 "NENU500"  
 Relax. delay 0.500 sec  
 Pulse 45.0 degrees  
 Acq. time 1.360 sec  
 Width 31421.0 Hz  
 256 repetitions  
 OBSERVE C13 125.6754216 MHz  
 DECOUPLE H1 499.8051255 MHz  
 Power 42 dB  
 continuously on  
 WALTZ-16 modulated  
 DATA PROCESSING  
 Line broadening 1.5 Hz  
 FT size 131072  
 Total time 3 hr, 56 sec

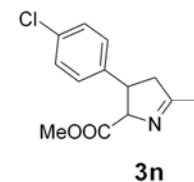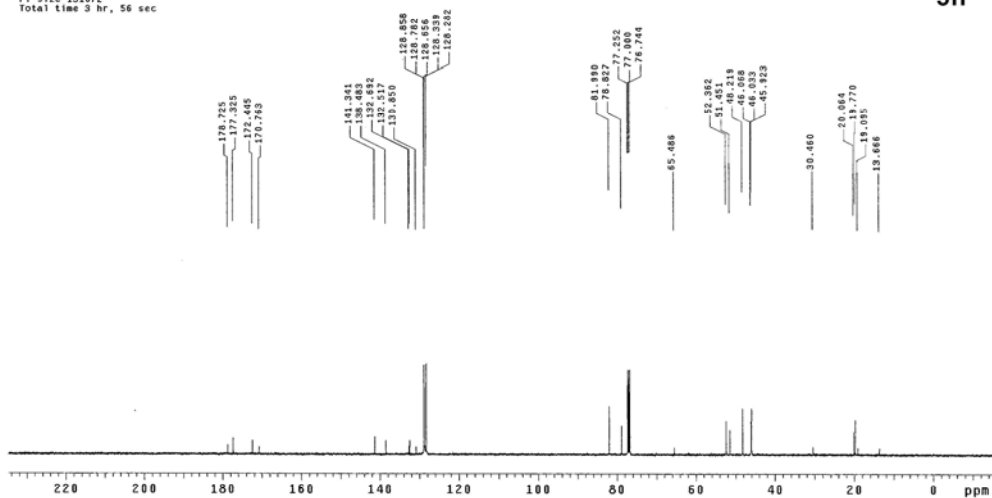

STANDARD PROTON PARAMETERS  
 Archive directory: /export/home/ouyy/vnmr/52\data  
 Sample directory:  
 Pulse Sequence: s2pu1  
 Solvent: CDCl3  
 Ambient temperature  
 File: 2584  
 INOVA-500 "NENU500"  
 Relax. delay 1.000 sec  
 Pulse 45.0 degrees  
 Acq. time 1.892 sec  
 Width 3158.6 Hz  
 8 repetitions  
 OBSFREQ M1: 499.8025726 MHz  
 DATA PROCESSING  
 FT size 85238  
 Total time 0 min, 23 sec

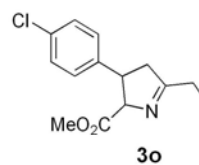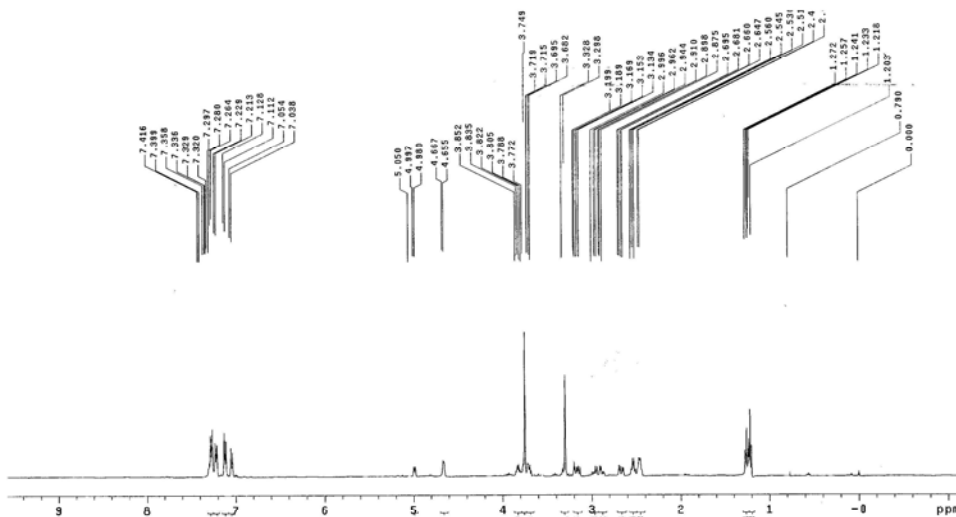

STANDARD CARBON PARAMETERS  
 Archive directory: /export/home/ouyy/vnmr/52\data  
 Sample directory:  
 Pulse Sequence: s2pu1  
 Solvent: cdcl3  
 Ambient temperature  
 User: 1-14-07  
 File: 2585  
 INOVA-500 "NENU500"  
 Relax. delay 0.500 sec  
 Pulse 45.0 degrees  
 Acq. time 1.380 sec  
 Width 31421.8 Hz  
 256 repetitions  
 OBSERVE: C13, 125.8254646 MHz  
 DECOUPLE: H1, 499.8058905 MHz  
 Power 42 dB  
 continuously on  
 WALTZ-16 modulated  
 DATA PROCESSING  
 Line broadening 1.5 Hz  
 FT size 131872  
 Total time 2 hr, 3 min, 31 sec

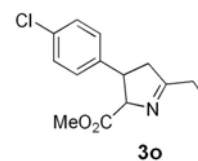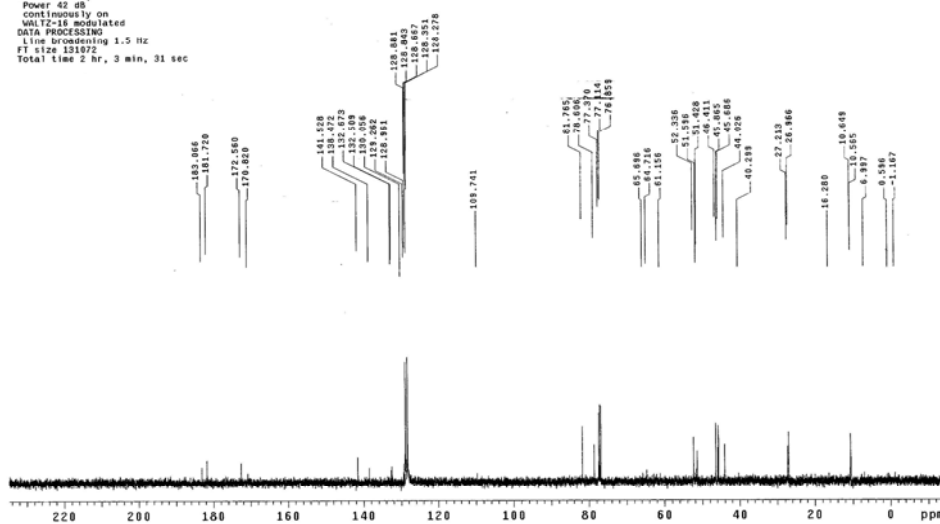

STANDARD PROTON PARAMETERS  
 Archive directory: /export/home/ouyy/vnmrsvs/data  
 Sample directory:  
 Pulse Sequence: s2pu1  
 Solvent: CDCl3  
 Ambient temperature  
 File: w531  
 INOVA-500 "NENU500"  
 Relax. delay 1.000 sec  
 Pulse 45.0 degrees  
 Acq. time 1.882 sec  
 Width 8281.0 Hz  
 8 repetitions  
 OBSERVE H1, 499.8025695 MHz  
 DATA PROCESSING  
 FT size 65536  
 Total time 0 min, 23 sec

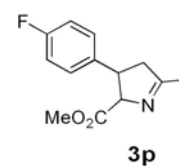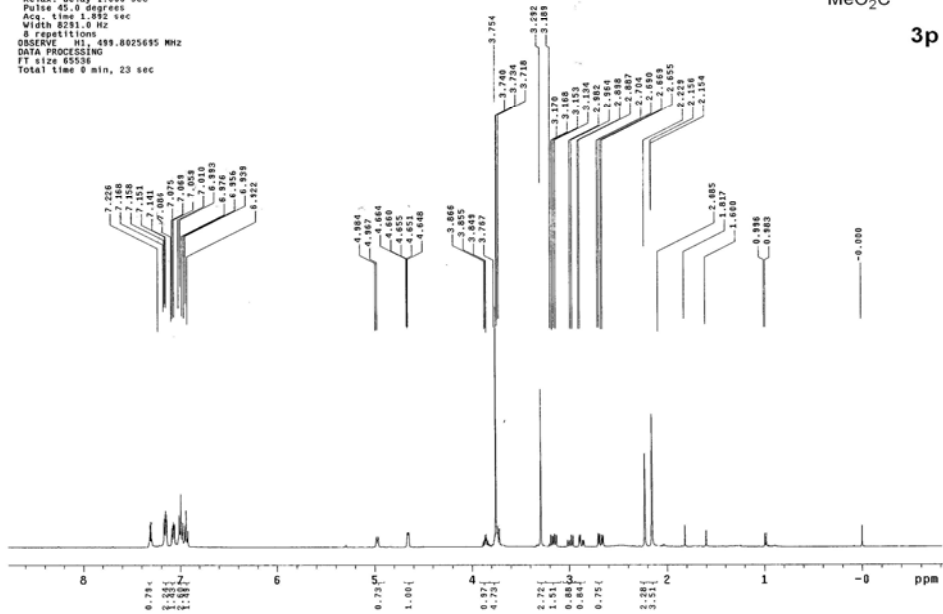

STANDARD CARBON PARAMETERS  
 Archive directory: /export/home/ouyy/vnmrsvs/data  
 Sample directory:  
 Pulse Sequence: s2pu1  
 Solvent: cdcl3  
 Ambient temperature  
 User: 1-14-87  
 File: 2411  
 INOVA-500 "NENU500"  
 Relax. delay 0.500 sec  
 Pulse 45.0 degrees  
 Acq. time 1.380 sec  
 Width 31421.0 Hz  
 5184 repetitions  
 OBSERVE C13, 125.8754635 MHz  
 DECOUPLE H1, 499.8050865 MHz  
 Power 42 dB  
 continuous on  
 WALTZ-16 modulated  
 DATA PROCESSING  
 Line broadening 1.5 Hz  
 FT size 131072  
 Total time 3 hr, 56 sec

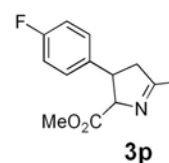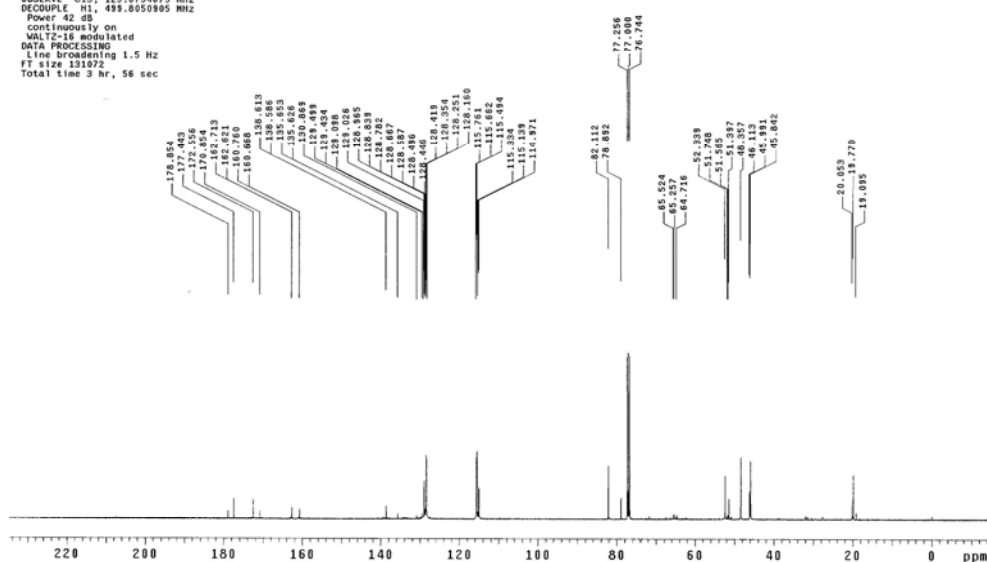



STANDARD PROTON PARAMETERS  
 Archive directory: /export/home/ouuy/vnmrsys/data  
 Sample directory: -  
 Pulse Sequence: s2pu1  
 Solvent: CDCl3  
 Ambient temperature  
 File: v325  
 INOVA-500 "MENUM500"  
 Relax. delay 1.000 sec  
 Pulse 45.0 degrees  
 Acq. time 1.892 sec  
 Width 8890.0 Hz  
 OBSERVE H1 499.8025730 MHz  
 8 repetitions  
 DATA PROCESSING  
 FT size 65536  
 Total time 0 min, 23 sec

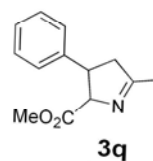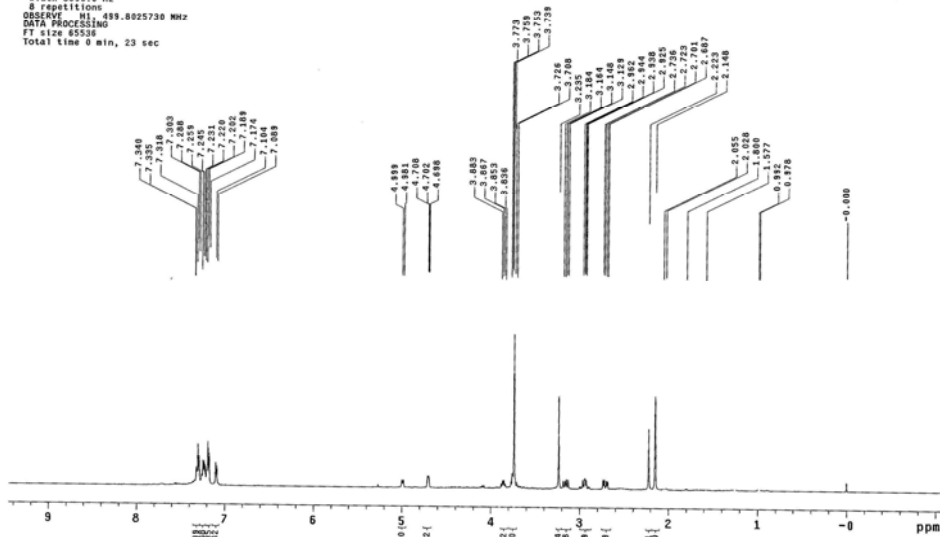

STANDARD CARBON PARAMETERS  
 Archive directory: /export/home/ouuy/vnmrsys/data  
 Sample directory: -  
 Pulse Sequence: s2pu1  
 Solvent: cdcl3  
 Ambient temperature  
 User: 1-14-07  
 File: z356  
 INOVA-500 "MENUM500"  
 Relax. delay 0.500 sec  
 Pulse 45.0 degrees  
 Acq. time 1.360 sec  
 Width 31421.8 Hz  
 128 repetitions  
 OBSERVE C13 125.6754848 MHz  
 DECOUPLE H1 499.8050905 MHz  
 Power 42 dB  
 continuously on  
 WALTZ-16 modulated  
 DATA PROCESSING  
 Line Broadening 1.5 Hz  
 FT size 131072  
 Total time 3 hr, 56 sec

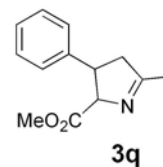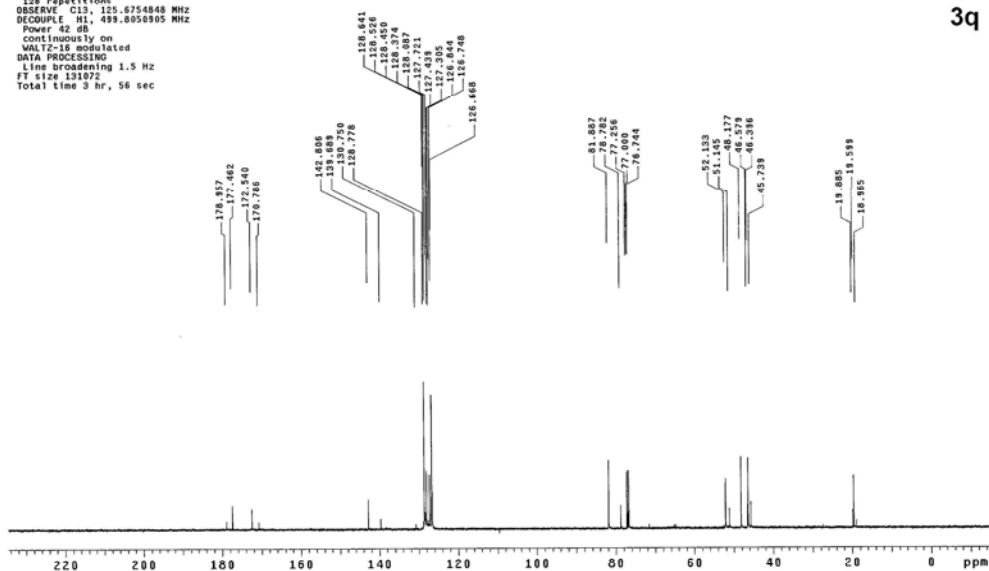

STANDARD PROTON PARAMETERS

Archive directory: /export/home/ouyy/vnr/sys/data  
 Sample directory:  
 Pulse Sequence: s2pu1  
 Solvent: CDCl3  
 Ambient temperature  
 File: v625  
 INOVA-500 "NENUS00"  
 Relax. delay 1.000 sec  
 Pulse 45.4 degrees  
 Acq. time 1.892 sec  
 Width 8782.5 Hz  
 8 repetitions  
 OBSERVE H1, 499.8025650 MHz  
 DATA PROCESSING  
 FT size 65536  
 Total time 0 min, 23 sec

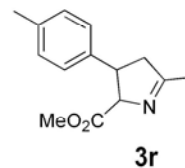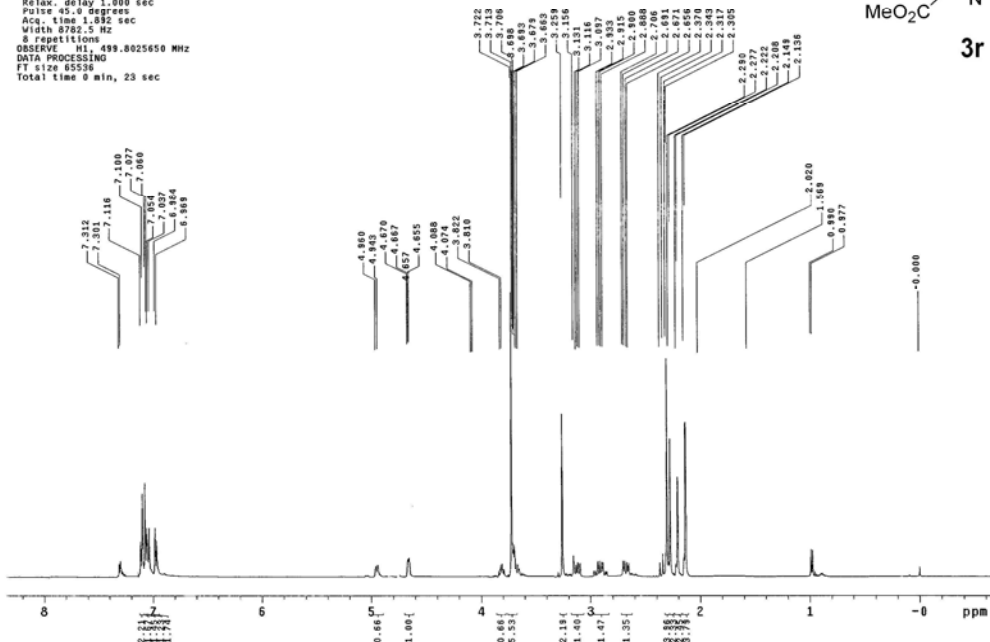

STANDARD CARBON PARAMETERS

Archive directory: /export/home/ouyy/vnr/sys/data  
 Sample directory:  
 Pulse Sequence: s2pu1  
 Solvent: cdcl3  
 Ambient temperature  
 User: 1-14-87  
 File: z421  
 INOVA-500 "NENUS00"  
 Relax. delay 0.500 sec  
 Pulse 45.0 degrees  
 Acq. time 1.300 sec  
 Width 31421.8 Hz  
 128 repetitions  
 OBSERVE C13, 125.8254651 MHz  
 DECOUPLE H1, 499.8050965 MHz  
 Power 42 dB  
 continuously on  
 WALTZ-16 modulated  
 DATA PROCESSING  
 Line broadening 1.5 Hz  
 FT size 131872  
 Total time 2 hr, 3 min, 31 sec

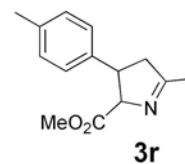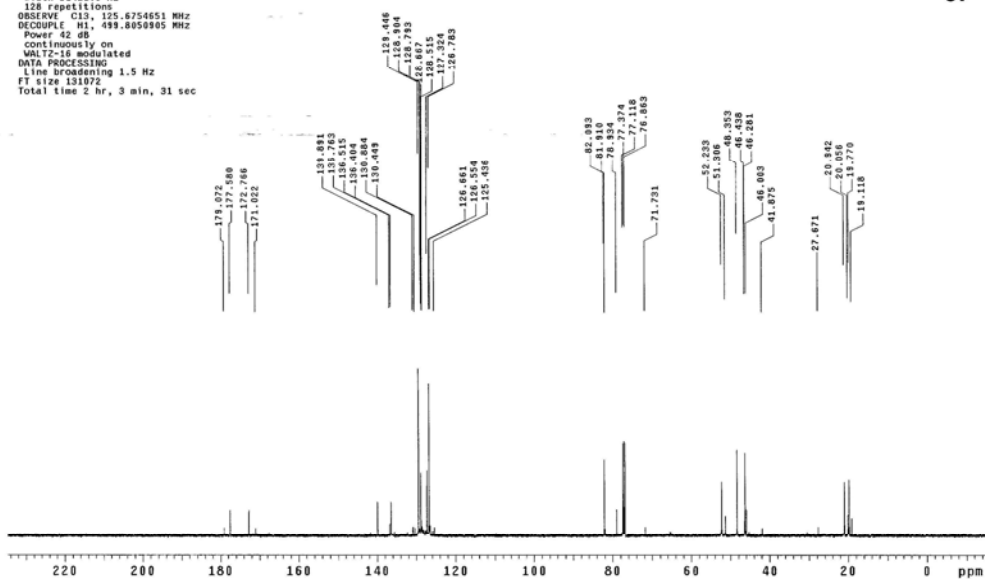

STANDARD PROTON PARAMETERS

Archive directory: /export/home/ovyy/vnmrsys/data  
 Sample directory:  
 Pulse Sequence: s2pu1  
 Solvent: CDCl3  
 Ambient temperature  
 File: v626  
 INOVA-500 "NENU500"  
 Relax. delay 1.000 sec  
 Pulse 45.0 degrees  
 Acq. time 1.832 sec  
 Width 9782.3 Hz  
 8 repetitions  
 OBSERVE H1, 499.8025715 MHz  
 DATA PROCESSING  
 FT size 65536  
 Total time 0 min, 23 sec

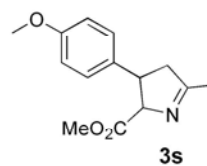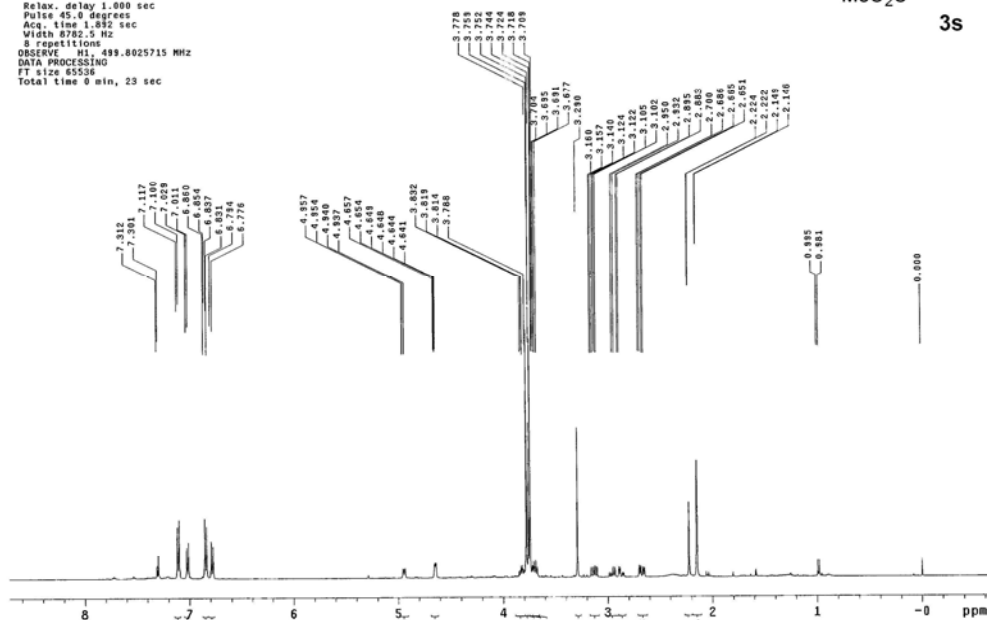

STANDARD CARBON PARAMETERS

Archive directory: /export/home/ovyy/vnmrsys/data  
 Sample directory:  
 Pulse Sequence: s2pu1  
 Solvent: cdcl3  
 Ambient temperature  
 User: 1-14-07  
 File: z357  
 INOVA-500 "NENU500"  
 Relax. delay 0.500 sec  
 Pulse 45.0 degrees  
 Acq. time 1.380 sec  
 Width 91421.8 Hz  
 20 repetitions  
 OBSERVE C13, 125.6754670 MHz  
 DECOUPLE H1, 499.8050905 MHz  
 Power 42 dB  
 continuously on  
 WALTZ-16 modulated  
 DATA PROCESSING  
 Line broadening 1.5 Hz  
 FT size 131072  
 Total time 3 hr, 56 sec

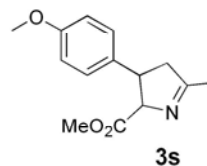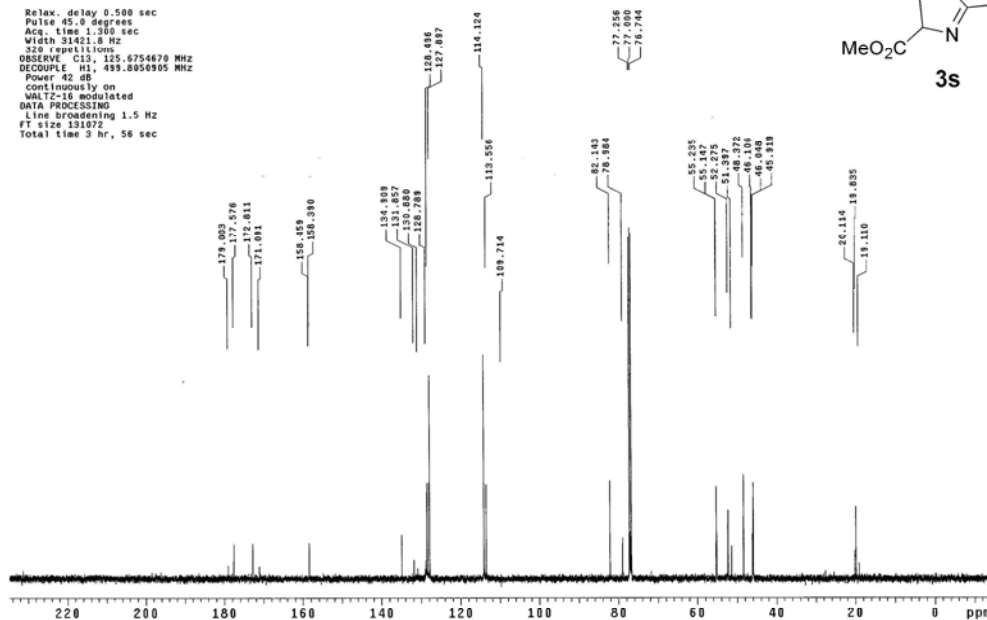

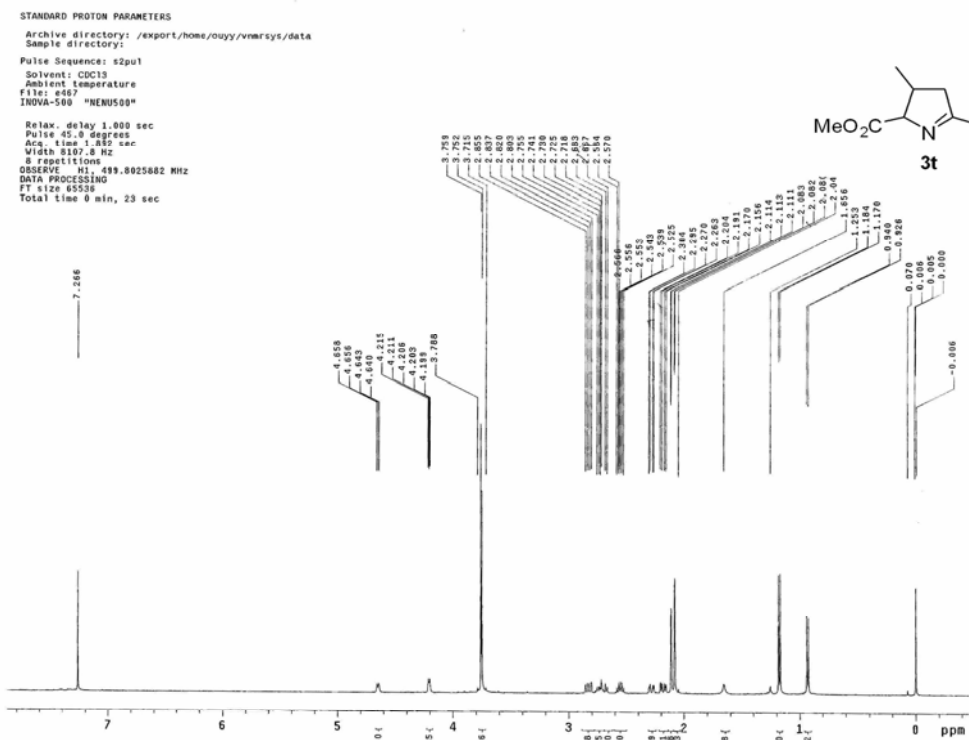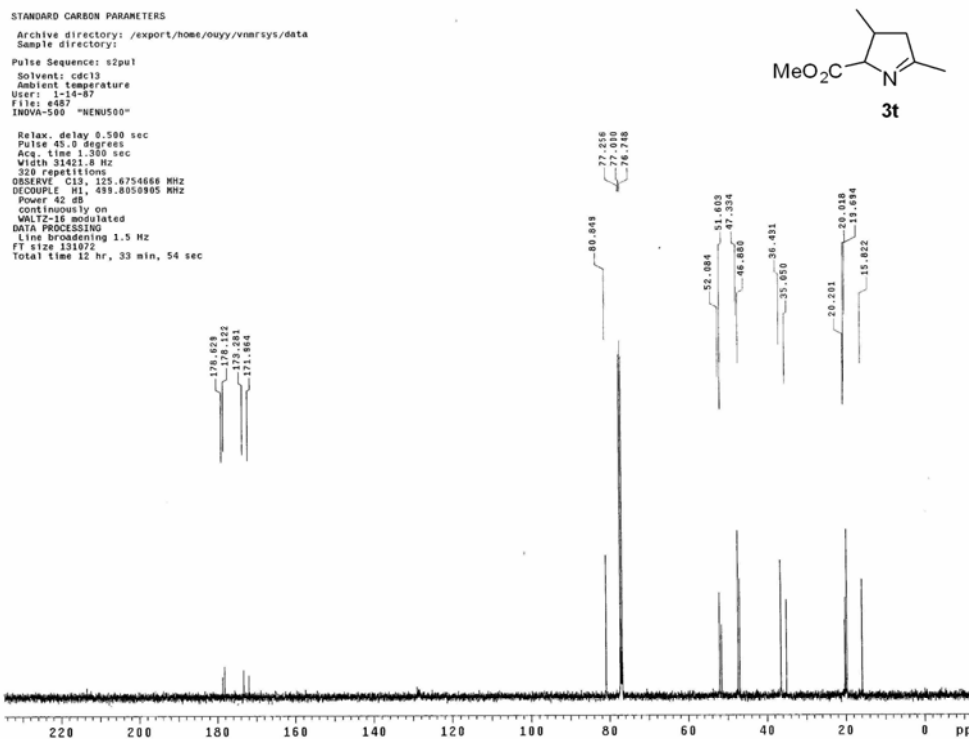

STANDARD PROTON PARAMETERS

Archive directory: /export/home/ouyy/vnmrsys/data  
 Sample directory:

Pulse Sequence: s2pu1  
 Solvent: CDCl3  
 Ambient temperature  
 File: 2287  
 INOVA-500 "NENUS00"

Relax. delay 1.000 sec  
 Pulse 45.0 degrees  
 Acq. time 1.052 sec  
 Width 9156.6 Hz  
 8 repetitions  
 OBSERVE H1, 499.8026254 MHz  
 DATA PROCESSING  
 FT size 65538  
 Total time 0 min, 23 sec

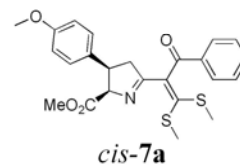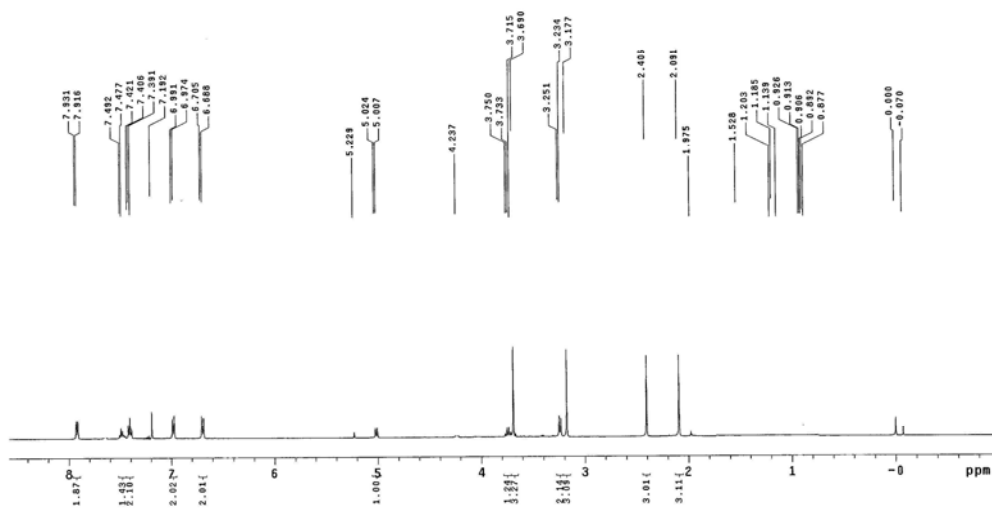

STANDARD CARBON PARAMETERS

Archive directory: /export/home/ouyy/vnmrsys/data  
 Sample directory:

Pulse Sequence: s2pu1  
 Solvent: cdcl3  
 Ambient temperature  
 User: 1-14-07  
 File: 2288  
 INOVA-500 "NENUS00"

Relax. delay 0.500 sec  
 Pulse 45.0 degrees  
 Acq. time 1.300 sec  
 Width 31421.8 Hz  
 448 repetitions  
 OBSERVE C13, 125.6754632 MHz  
 DECOUPLE H1, 499.8050905 MHz  
 Power 42 dB  
 continuously on  
 ML12-19 modulated  
 DATA PROCESSING  
 Line broadening 1.5 Hz  
 FT size 131922  
 Total time 2 hr, 3 min, 31 sec

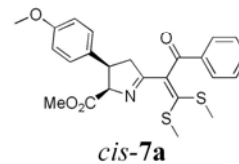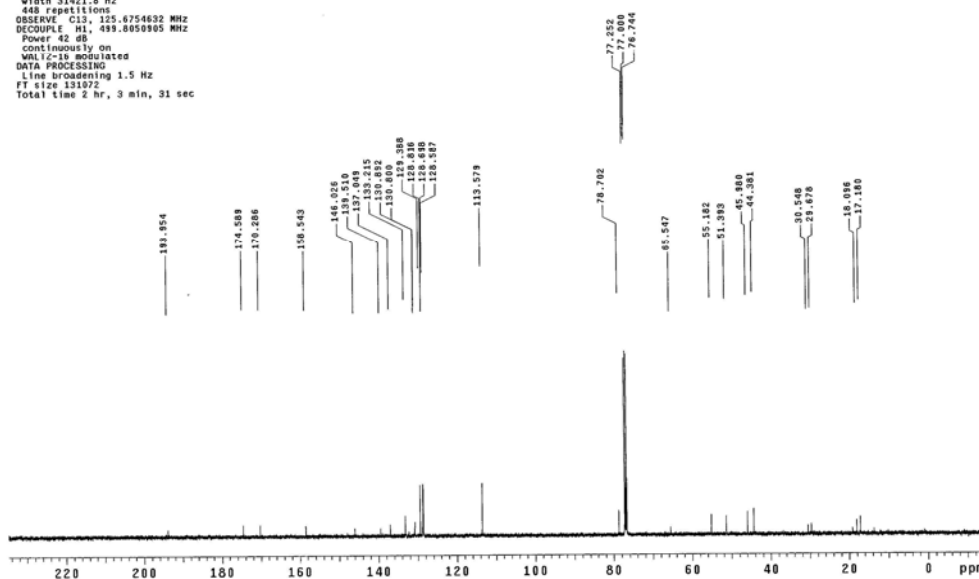

STANDARD PROTON PARAMETERS

Archive directory: /export/home/ouyy/vnmrsvs/data  
 Sample directory:  
 Pulse Sequence: s2pul  
 Solvent: CDCl3  
 Ambient temperature  
 File: 2236  
 INOVA-500 "NEMUS00"  
 Relax. delay 1.000 sec  
 Pulse 45.0 degrees  
 Acq. time 1.892 sec  
 Width 9158.0 Hz  
 0 repetitions  
 OBSERVE H1 499.8025899 MHz  
 DATA PROCESSING  
 FT size 65536  
 Total time 0 min, 23 sec

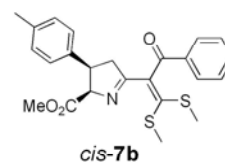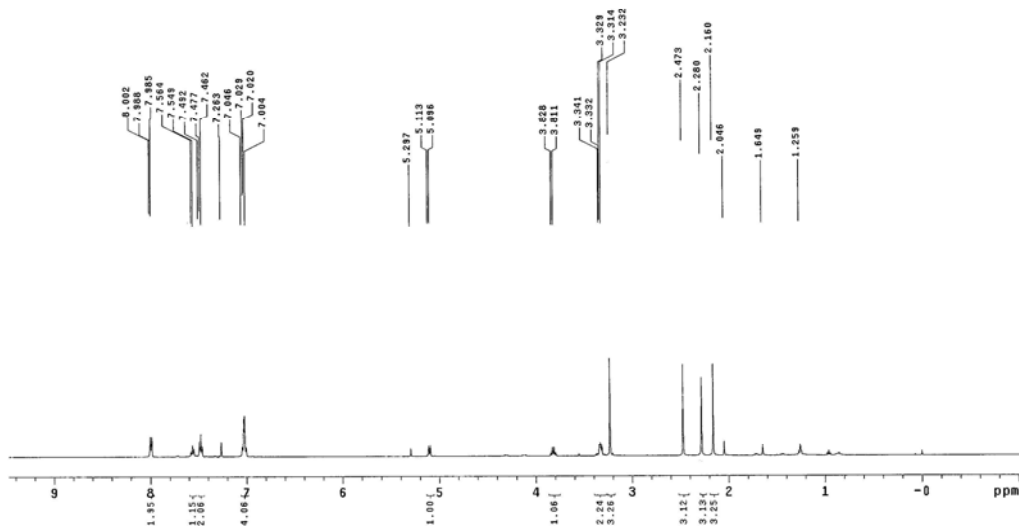

STANDARD CARBON PARAMETERS

Archive directory: /export/home/ouyy/vnmrsvs/data  
 Sample directory:  
 Pulse Sequence: s2pul  
 Solvent: cdcl3  
 Ambient temperature  
 User: 1-14-07  
 File: 2235  
 INOVA-500 "NEMUS00"  
 Relax. delay 0.500 sec  
 Pulse 45.0 degrees  
 Acq. time 1.300 sec  
 Width 31421.0 Hz  
 192 repetitions  
 OBSERVE C13 125.6754656 MHz  
 DECOUPLE H1 499.8050905 MHz  
 Power 42.06  
 continuously on  
 WALTZ-16 modulated  
 DATA PROCESSING  
 Line broadening 1.5 Hz  
 FT size 131072  
 Total time 2 hr, 3 min, 31 sec

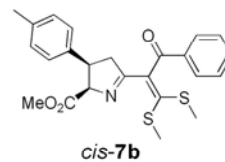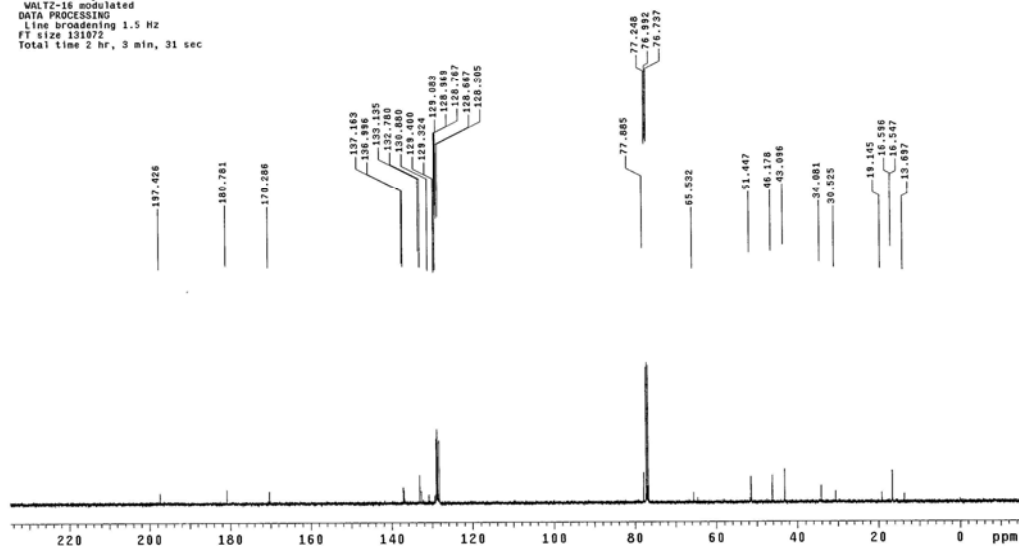

STANDARD PROTON PARAMETERS

Archive directory: /export/home/ouyy/vnmr/sys/data  
 Sample directory:  
 Pulse Sequence: s2pu1  
 Solvent: CDCl3  
 Ambient temperature  
 File: r880  
 INOVA-500 "NENU500"  
 Relax. delay 1.000 sec  
 Pulse 220.4 degrees  
 Acq. time 1.453 sec  
 Width 9052.8 Hz  
 8 repetitions  
 OBSERVE M1, 499.8025306 MHz  
 DATA PROCESSING  
 FT size 85538  
 Total time 0 min, 19 sec

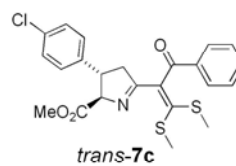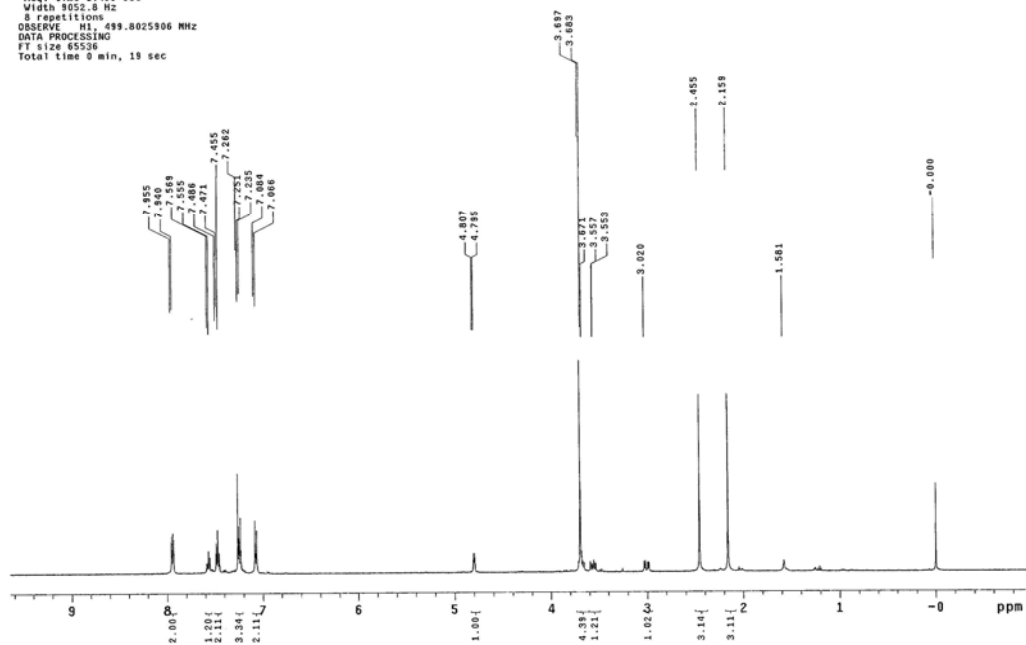

STANDARD CARBON PARAMETERS

Archive directory: /export/home/ouyy/vnmr/sys/data  
 Sample directory:  
 Pulse Sequence: s2pu1  
 Solvent: cdcl3  
 Ambient temperature  
 User: 1-14-87  
 File: 2922  
 INOVA-500 "NENU500"  
 Relax. delay 0.500 sec  
 Pulse 45.0 degrees  
 Acq. time 1.380 sec  
 Width 31421.8 Hz  
 192 repetitions  
 OBSERVE C13, 125.6754584 MHz  
 DECOUPLE M1, 499.8050905 MHz  
 Power 42 db  
 continuously on  
 WALTZ-16 modulated  
 DATA PROCESSING  
 Line broadening 1.5 Hz  
 FT size 131072  
 Total time 2 hr, 3 min, 31 sec

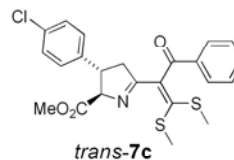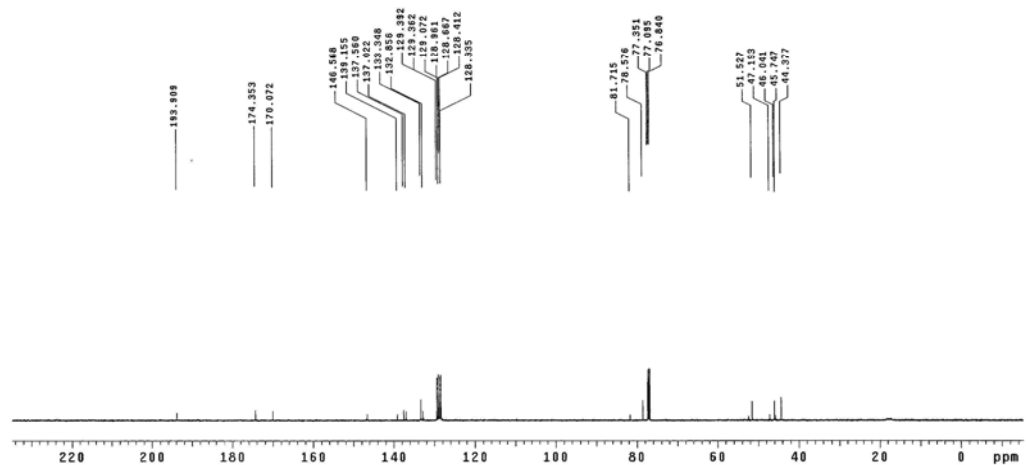

STANDARD PROTON PARAMETERS

Archive directory: /export/home/ouyy/vnmrsys/data  
 Sample directory:  
 Pulse Sequence: s2pul  
 Solvent: CDCl3  
 Ambient temperature  
 File: 1883  
 INOVA-500 "NENU500"  
 Relax. delay 1.000 sec  
 Pulse 220.4 degrees  
 Acq. time 1.455 sec  
 Width 8052.8 Hz  
 8 repetitions  
 OBSERVE H1, 499.8025890 MHz  
 DATA PROCESSING  
 FT size 65536  
 Total time 0 min, 19 sec

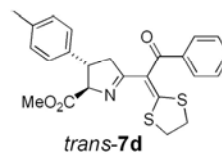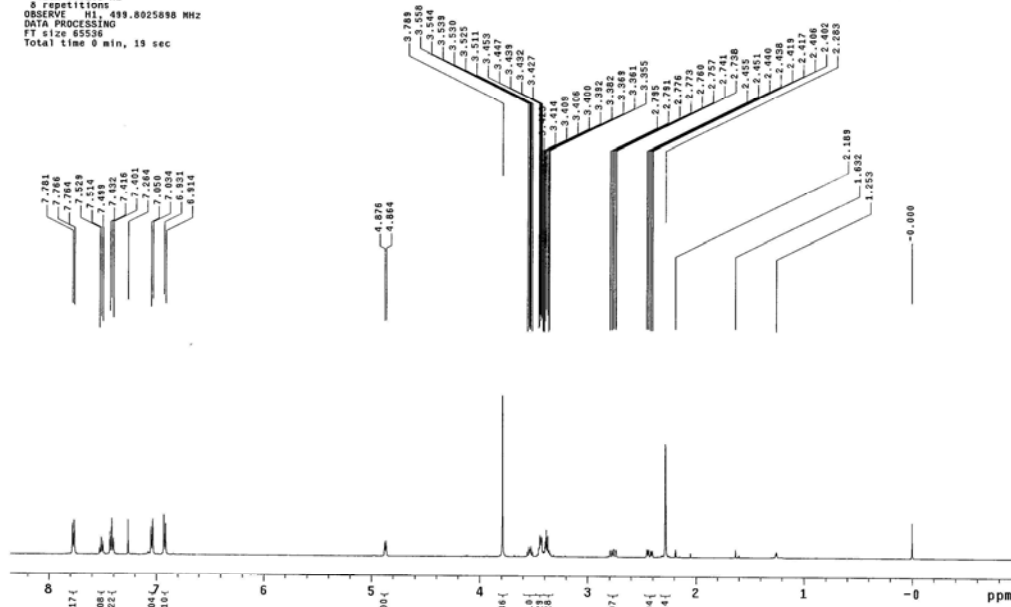

STANDARD CARBON PARAMETERS

Archive directory: /export/home/ouyy/vnmrsys/data  
 Sample directory:  
 Pulse Sequence: s2pul  
 Solvent: cdcl3  
 Ambient temperature  
 User: 1-14-07  
 File: y927  
 INOVA-500 "NENU500"  
 Relax. delay 0.500 sec  
 Pulse 45.0 degrees  
 Acq. time 1.300 sec  
 Width 51421.8 Hz  
 128 repetitions  
 OBSERVE C13, 125.6754771 MHz  
 DECOUPLE H1, 499.8050905 MHz  
 Power 42 dB  
 continuously on  
 WALTZ-16 modulated  
 DATA PROCESSING  
 Line broadening 1.5 Hz  
 FT size 131072  
 Total time 3 hr, 56 sec

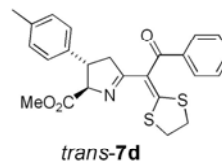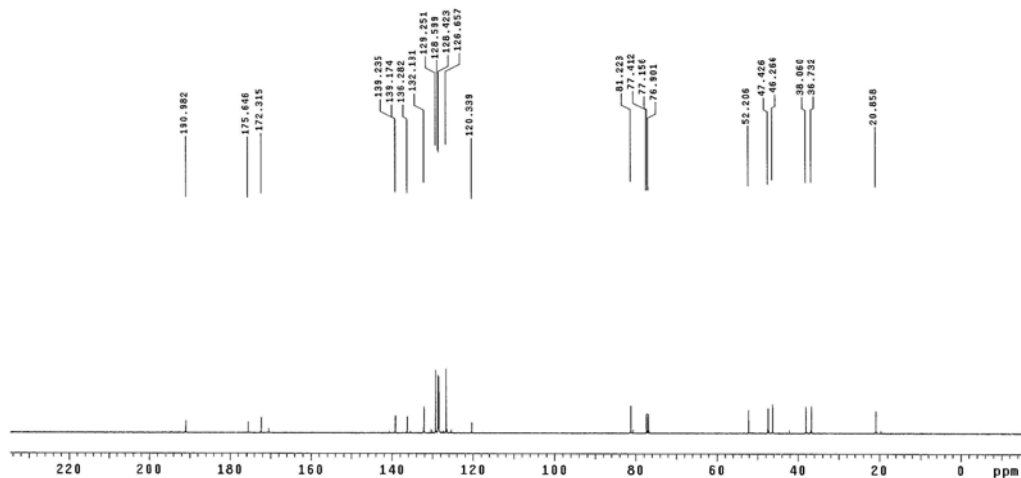



STANDARD PROTON PARAMETERS

Archive directory: /export/home/ouyy/vmr/sys/data  
 Sample directory:  
 Pulse Sequence: s2pul  
 Solvent: CDCl3  
 Ambient temperature  
 File: 1084  
 INOVA-500 "NENUS00"  
 Relax. delay 1.000 sec  
 Pulse 225.4 degrees  
 Acq. time 1.455 sec  
 Width 9052.8 Hz  
 16 repetitions  
 OBSERVE H1, 499.8025895 MHz  
 DATA PROCESSING  
 FT size 65536  
 Total time 6 min, 39 sec

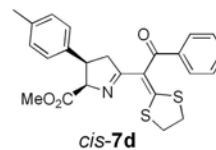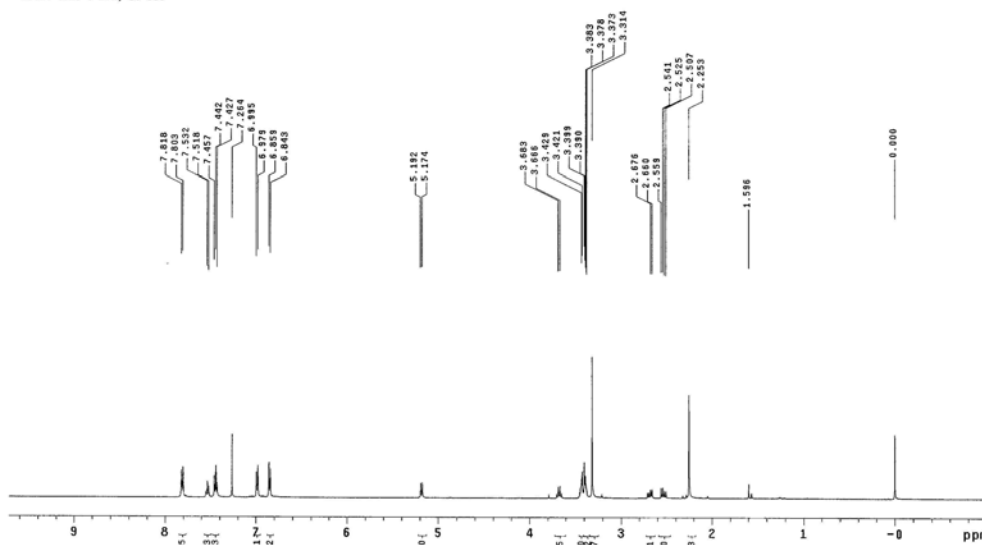

STANDARD CARBON PARAMETERS

Archive directory: /export/home/ouyy/vmr/sys/data  
 Sample directory:  
 Pulse Sequence: s2pul  
 Solvent: cdcl3  
 Ambient temperature  
 User: 1-14-87  
 File: y928  
 INOVA-500 "NENUS00"  
 Relax. delay 0.500 sec  
 Pulse 45.0 degrees  
 Acq. time 1.380 sec  
 Width 31421.8 Hz  
 126 repetitions  
 OBSERVE C13, 125.6754771 MHz  
 DECOUPLE H1, 499.8050905 MHz  
 Power 42 dB  
 continuously on  
 WALTZ-16 modulated  
 DATA PROCESSING  
 Line broadening 1.5 Hz  
 FT size 131072  
 Total time 3 hr, 56 sec

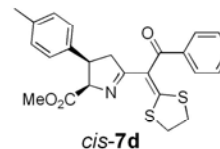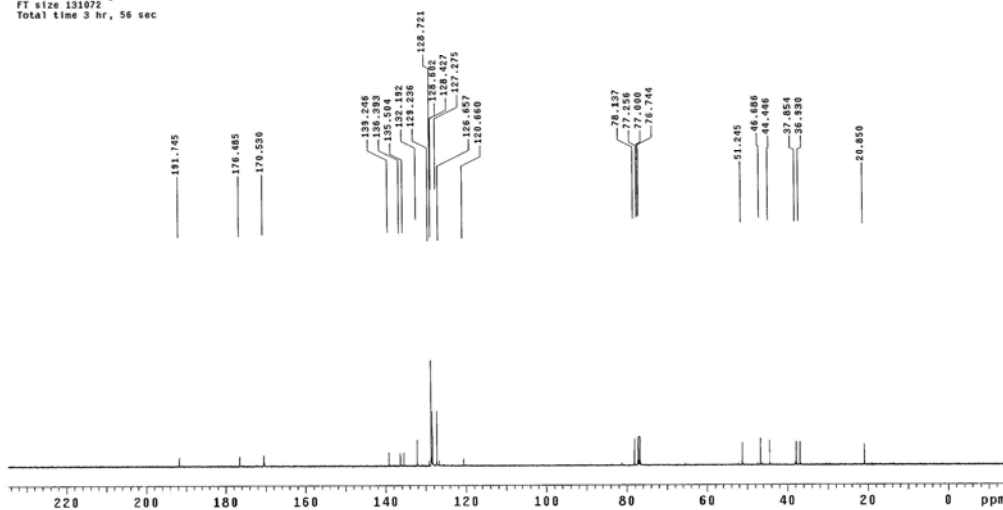

STANDARD PROTON PARAMETERS

Archive directory: /export/home/ouyy/vnmrsys/data  
 Sample directory:  
 Pulse Sequence: s2pu1  
 Solvent: CDCl3  
 Ambient temperature  
 File: y959  
 INOVA-500 "MENU500"  
 Relax. delay 1.000 sec  
 Pulse 45.0 degrees  
 Acq. time 1.850 sec  
 Width 8241.5 Hz  
 8 repetitions  
 OBSERVE H1, 499.8025905 MHz  
 DATA PROCESSING  
 FT size 65536  
 Total time 0 min, 23 sec

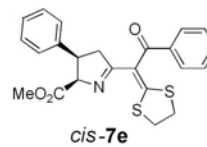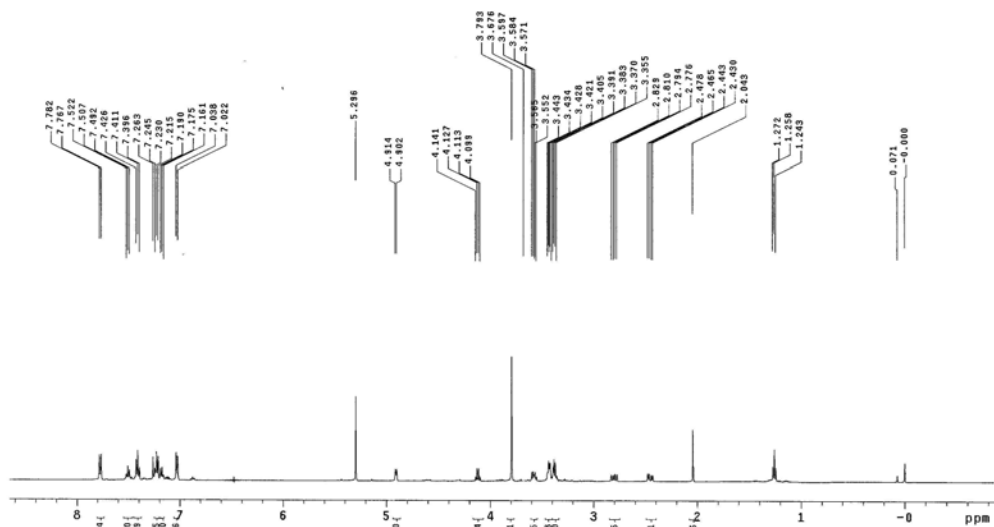

STANDARD CARBON PARAMETERS

Archive directory: /export/home/ouyy/vnmrsys/data  
 Sample directory:  
 Pulse Sequence: s2pu1  
 Solvent: cdc13  
 Ambient temperature  
 User: 1-14-07  
 File: y959  
 INOVA-500 "MENU500"  
 Relax. delay 8.500 sec  
 Pulse 45.0 degrees  
 Acq. time 1.300 sec  
 Width 31421.8 Hz  
 256 repetitions  
 OBSERVE C13, 125.8754642 MHz  
 DECOUPLE H1, 499.8050905 MHz  
 Power 42 dB  
 continuously on  
 WALTZ-16 modulated  
 DATA PROCESSING  
 Line broadening 1.5 Hz  
 FT size 131072  
 Total time 3 hr, 56 sec

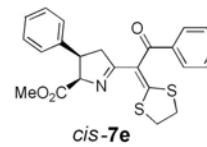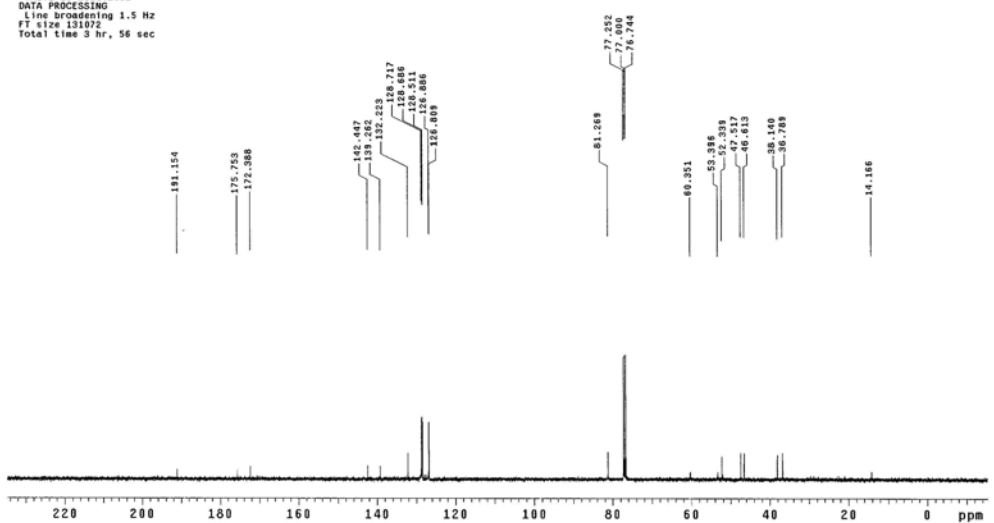

STANDARD PROTON PARAMETERS

Archive directory: /export/home/ouyy/vnmrsys/data  
 Sample directory:  
 Pulse Sequence: s2pu1  
 Solvent: CDCl3  
 Ambient temperature  
 File: y309  
 INOVA-500 "NENU500"  
 Relax. delay 1.000 sec  
 Pulse 45.0 degrees  
 Acq. time 1.492 sec  
 Width 8241.5 Hz  
 S repetitions  
 OBSERVE M1 499.8026239 MHz  
 DATA PROCESSING  
 FT size 85336  
 Total time 0 min, 23 sec

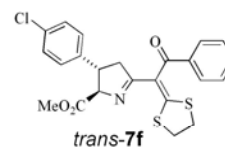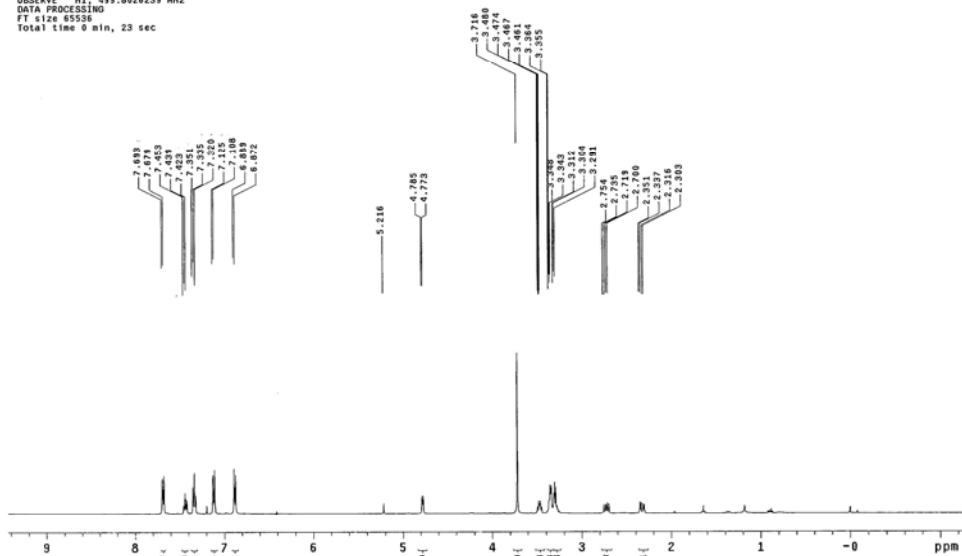

STANDARD CARBON PARAMETERS

Archive directory: /export/home/ouyy/vnmrsys/data  
 Sample directory:  
 Pulse Sequence: s2pu1  
 Solvent: cdcl3  
 Ambient temperature  
 User: 1-14-87  
 File: y309  
 INOVA-500 "NENU500"  
 Relax. delay 0.500 sec  
 Pulse 45.0 degrees  
 Acq. time 1.389 sec  
 Width 31421.8 Hz  
 S repetitions  
 OBSERVE C13 125.6754718 MHz  
 DECOUPLE H1 499.8050905 MHz  
 Power 42 dB  
 continuously on  
 WALTZ-16 modulated  
 DATA PROCESSING  
 Line broadening 1.5 Hz  
 FT size 131072  
 Total time 3 hr, 56 sec

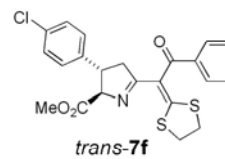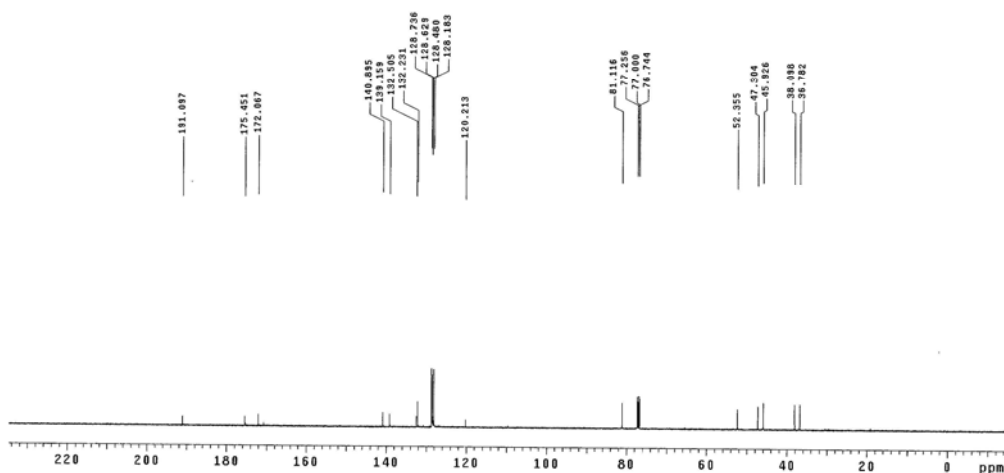

STANDARD PROTON PARAMETERS  
 Archive directory: /export/home/ouyy/vnmrsys/data  
 Sample directory:  
 Pulse Sequence: s2pu1  
 Solvent: CDCl3  
 Ambient temperature  
 File: y238  
 INOVA-500 "NENUS00"  
 Relax. delay 1.000 sec  
 Pulse 45.0 degrees  
 Acq. time 1.032 sec  
 Width 8241.5 Hz  
 S 8 repetitions  
 OBSERVE H1, 499.8025090 MHz  
 DATA PROCESSING  
 FT size 65536  
 Total time 0 min, 23 sec

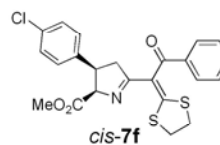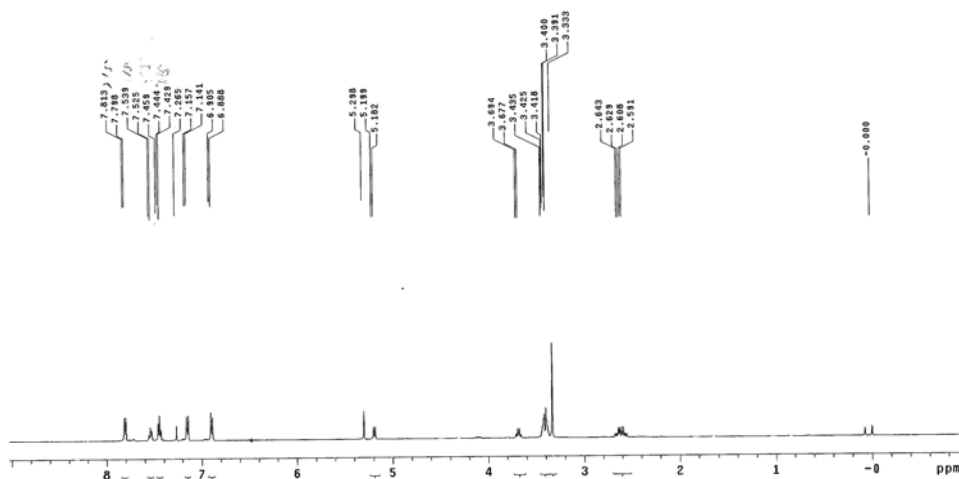

STANDARD CARBON PARAMETERS  
 Archive directory: /export/home/ouyy/vnmrsys/data  
 Sample directory:  
 Pulse Sequence: s2pu1  
 Solvent: cdcl3  
 Ambient temperature  
 User: 1-14-87  
 File: y561  
 INOVA-500 "NENUS00"  
 Relax. delay 0.500 sec  
 Pulse 45.0 degrees  
 Acq. time 1.300 sec  
 Width 31421.0 Hz  
 S 12 repetitions  
 OBSERVE C13, 125.6754642 MHz  
 DECOUPLE H1, 499.8050905 MHz  
 Power 42 dB  
 continuously on  
 WALTZ-16 modulated  
 DATA PROCESSING  
 Line broadening 1.5 Hz  
 FT size 131072  
 Total time 3 hr, 56 sec

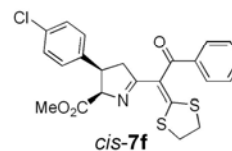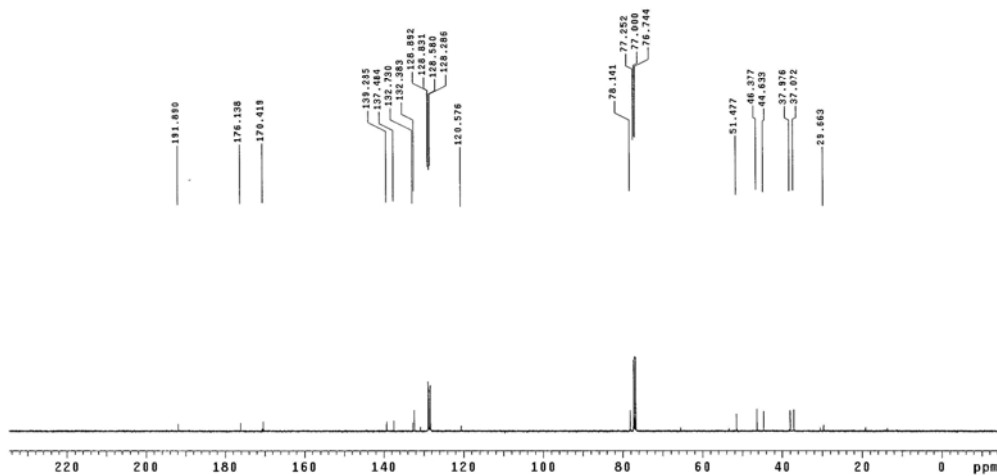

STANDARD PROTON PARAMETERS

Archive directory: /export/home/ouyy/vmrsys/data  
 Sample directory:  
 Pulse Sequence: s2pu1  
 Solvent: CDCl3  
 Ambient temperature  
 File: us96  
 INOVA-500 "MREUS00"  
 Relax. delay 1.000 sec  
 Pulse 45.0 degrees  
 Acq. time 1.880 sec  
 Width 8247.4 Hz  
 8 repetitions  
 OBSERVE M1 499.8025815 MHz  
 DATA PROCESSING  
 FT size 65536  
 Total time 0 min, 23 sec

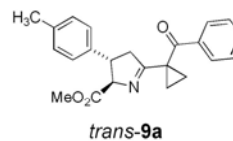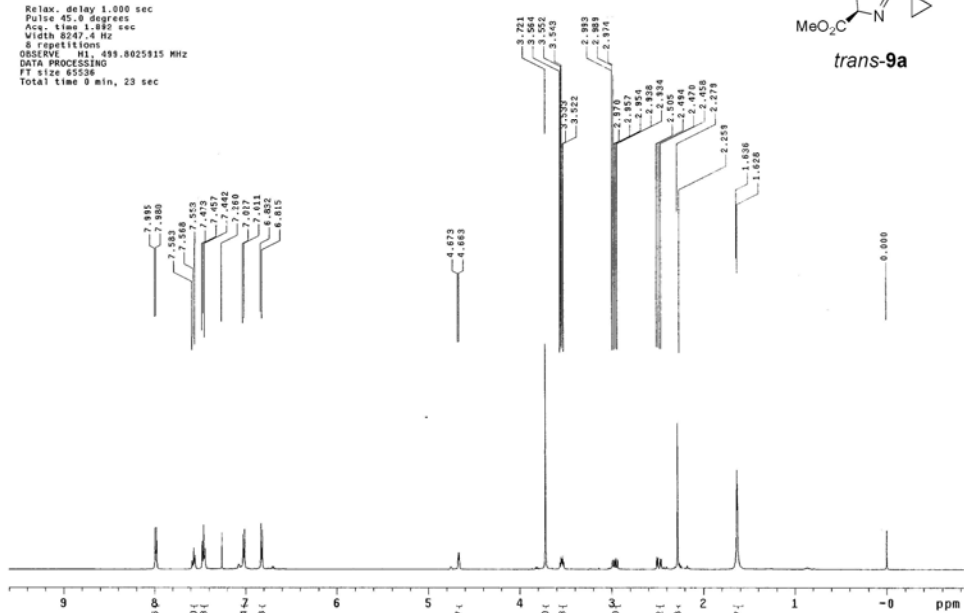

STANDARD CARBON PARAMETERS

Archive directory: /export/home/ouyy/vmrsys/data  
 Sample directory:  
 Pulse Sequence: s2pu1  
 Solvent: cdcl3  
 Ambient temperature  
 User: 1-14-87  
 File: y826  
 INOVA-500 "MREUS00"  
 Relax. delay 0.500 sec  
 Pulse 45.0 degrees  
 Acq. time 1.300 sec  
 Width 31421.8 Hz  
 128 repetitions  
 OBSERVE C13 125.8754824 MHz  
 DECOUPLE H1 499.8059805 MHz  
 Power 42 dB  
 continuous ly on  
 WALTZ-16 modulated  
 DATA PROCESSING  
 Line broadening 1.5 Hz  
 FT size 131072  
 Total time 3 hr, 56 sec

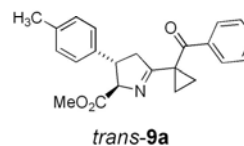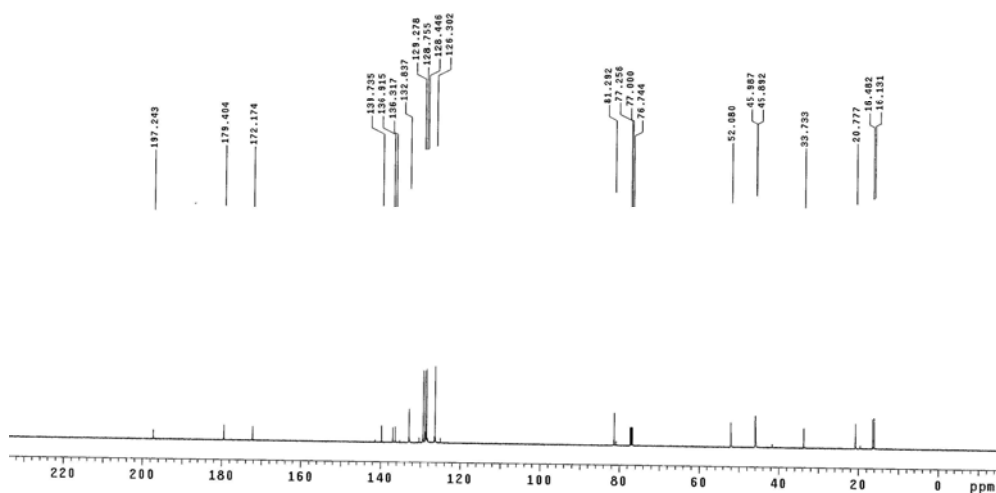

STANDARD PROTON PARAMETERS

Archive directory: /export/home/ouyy/vnmrsys/data  
Sample directory:  
Pulse Sequence: s2pul  
Solvent: CDCl3  
Ambient temperature  
File: z129  
INOVA-500 "NENU500"  
Relax. delay 1.000 sec  
Pulse 45.0 degrees  
Acq. time 1.852 sec  
Width 8241.5 Hz  
3 repetitions  
OBSERVE F1, 499.8625092 MHz  
DATA PROCESSING  
FT size 65526  
Total time 0 min, 23 sec

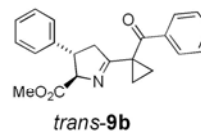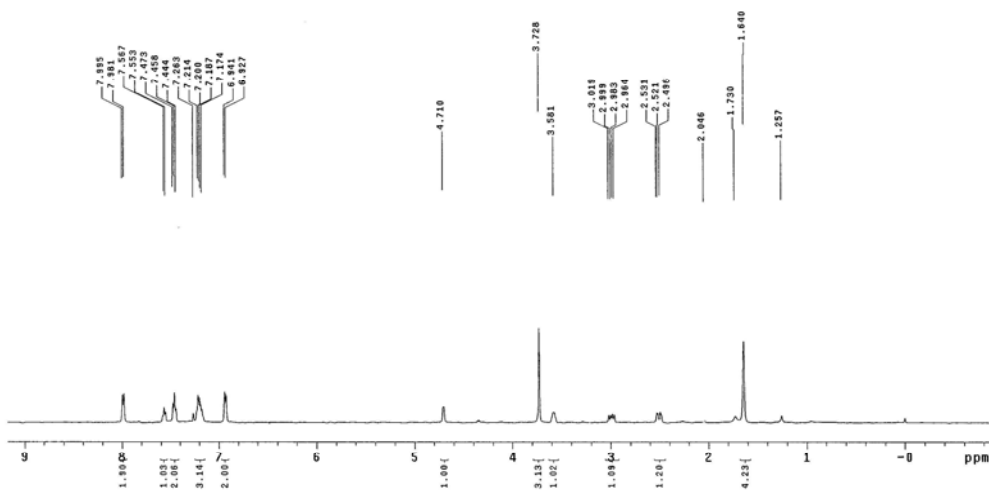

STANDARD CARBON PARAMETERS

Archive directory: /export/home/ouyy/vnmrsys/data  
Sample directory:  
Pulse Sequence: s2pul  
Solvent: cdcl3  
Ambient temperature  
User: 1-14-07  
File: z226  
INOVA-500 "NENU500"  
Relax. delay 0.500 sec  
Pulse 45.0 degrees  
Acq. time 1.300 sec  
Width 51921.8 Hz  
64 repetitions  
OBSERVE C13, 125.6754632 MHz  
DECOUPLE H1, 499.8650905 MHz  
Power 42 dB  
continuous on  
WALTZ-16 modulated  
DATA PROCESSING  
Line broadening 1.5 Hz  
FT size 131072  
Total time 2 hr, 3 min, 31 sec

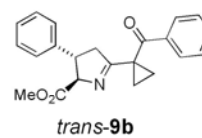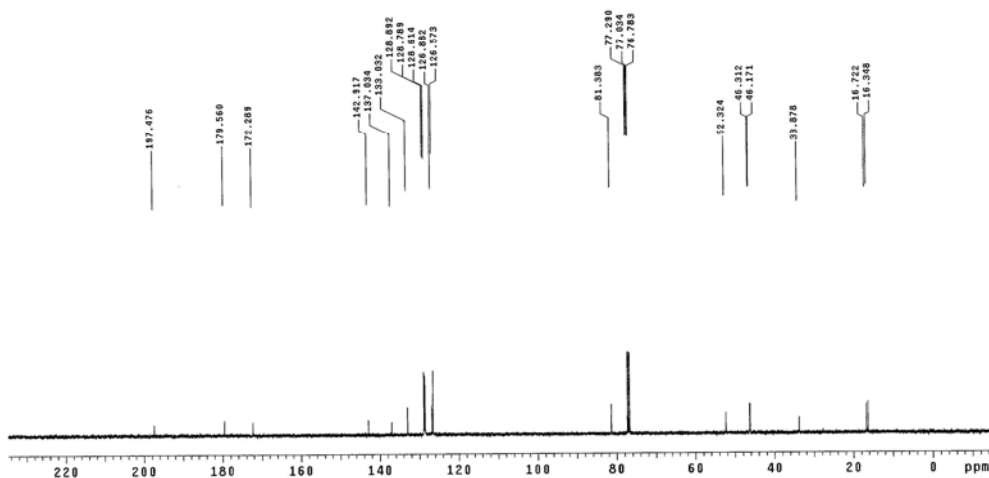

STANDARD PROTON PARAMETERS  
 Archive directory: /export/home/ouyy/vnmrsys/data  
 Sample directory:  
 Pulse Sequence: s2pul  
 Solvent: CDCl3  
 Ambient temperature  
 File: 2225  
 INOVA-500 "NENU500"  
 Relax. delay 1.000 sec  
 Pulse 45.0 degrees  
 Acq. time 1.002 sec  
 Width 9158.6 Hz  
 OBSERVE H1, 499.8025885 MHz  
 DATA PROCESSING  
 FT size 65536  
 Total time 0 min, 23 sec

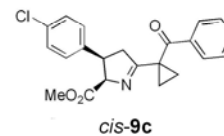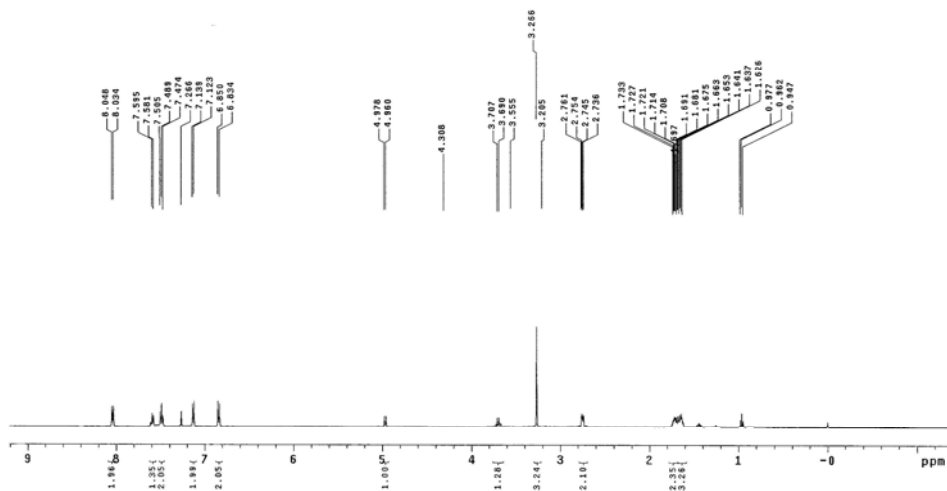

STANDARD CARBON PARAMETERS  
 Archive directory: /export/home/ouyy/vnmrsys/data  
 Sample directory:  
 Pulse Sequence: s2pul  
 Solvent: cdcl3  
 Ambient temperature  
 User: 1-14-07  
 File: 2271  
 INOVA-500 "NENU500"  
 Relax. delay 0.500 sec  
 Pulse 45.0 degrees  
 Acq. time 1.368 sec  
 Width 31421.8 Hz  
 OBSERVE C13, 125.6754656 MHz  
 DECOUPLE H1, 499.8059905 MHz  
 Power 42 dB  
 continuously on  
 WALTZ-16 modulated  
 DATA PROCESSING  
 Line Broadening 1.5 Hz  
 FT size 131072  
 Total time 2 hr, 3 min, 31 sec

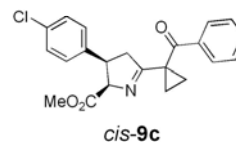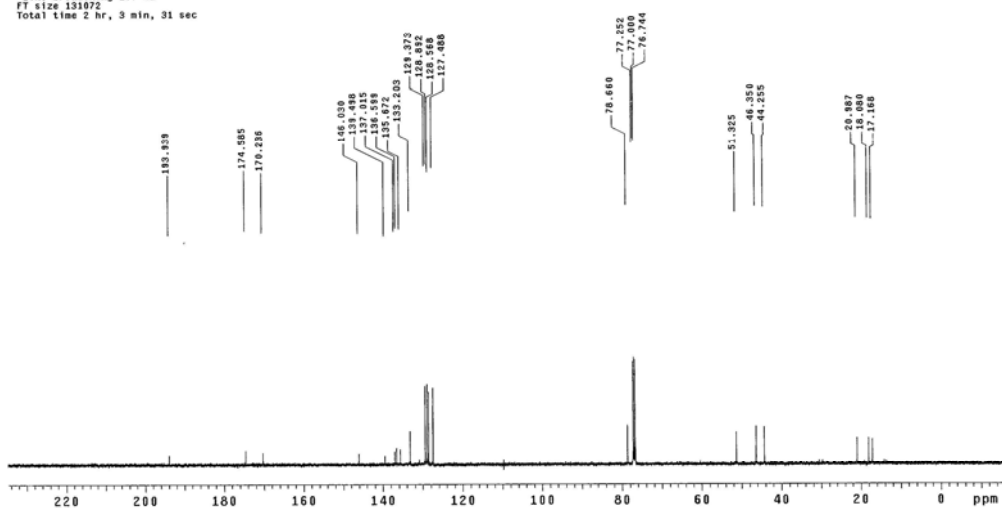





STANDARD PROTON PARAMETERS

Archive directory: /export/home/ouyy/vnmrsys/data  
 Sample directory:  
 Pulse Sequence: s2pu1  
 Solvent: CDCl3  
 Ambient temperature  
 File: c340  
 INOVA-500 "NENUS00"  
 Relax. delay 1.000 sec  
 Pulse 45.0 degrees  
 Acq. time 1.882 sec  
 Width 7996.8 Hz  
 S repetitions  
 OBSERVE H1, 499.0025934 MHz  
 DATA PROCESSING  
 FT size 65536  
 Total time 0 min, 23 sec

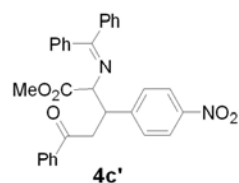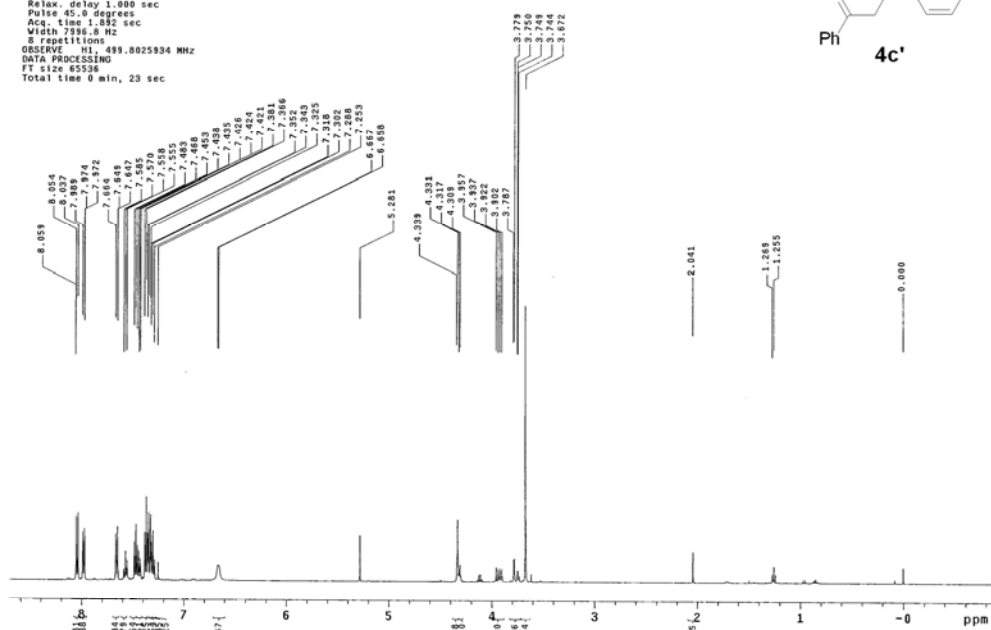

STANDARD CARBON PARAMETERS

Archive directory: /export/home/ouyy/vnmrsys/data  
 Sample directory:  
 Pulse Sequence: s2pu1  
 Solvent: c6d6  
 Ambient temperature  
 User: i-14-07  
 File: c365  
 INOVA-500 "NENUS00"  
 Relax. delay 0.500 sec  
 Pulse 45.0 degrees  
 Acq. time 1.380 sec  
 Width 31421.8 Hz  
 S repetitions  
 OBSERVE G13, 125.6754726 MHz  
 DECOUPLE H1, 499.8051355 MHz  
 Power 42 dB  
 continuously on  
 GALTZ-18 modulated  
 DATA PROCESSING  
 Line broadening 1.5 Hz  
 FT size 131072  
 Total time 3 hr, 56 sec

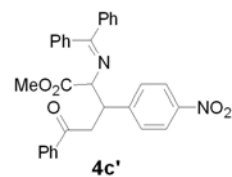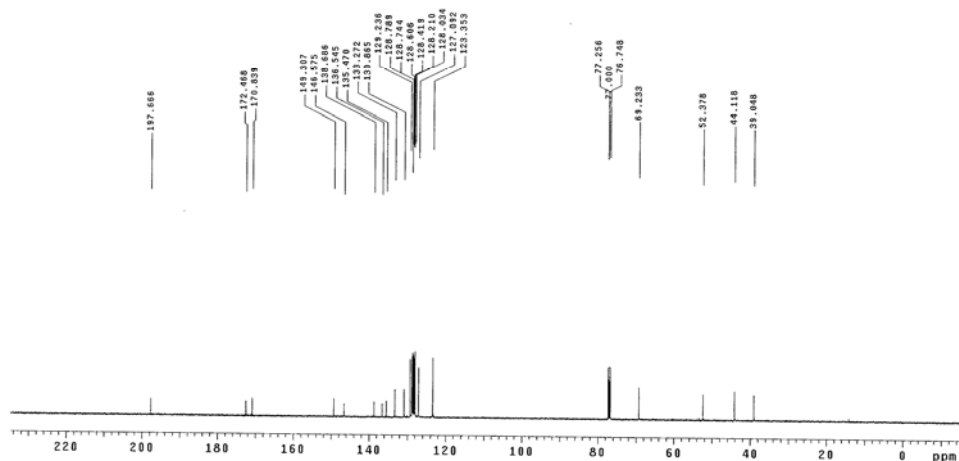

## V. Crystal data and ORTEP drawing of compound *cis*-**3d**

### 1. ORTEP drawing of compound **3d**

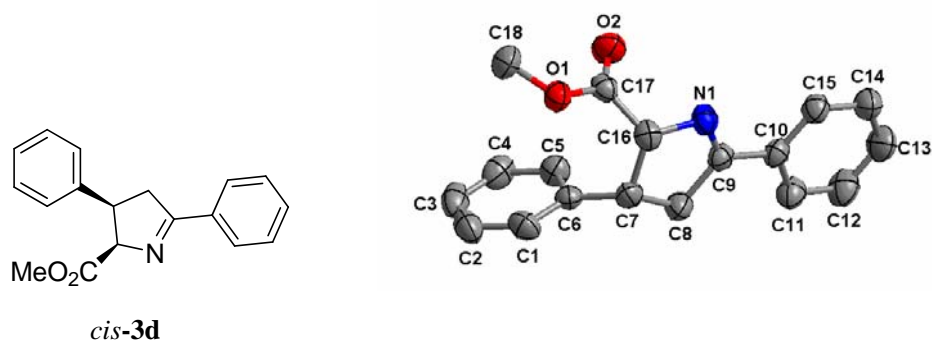

### 2. Crystal data

*cis*-**3d**: C<sub>18</sub>H<sub>17</sub>N<sub>1</sub>O<sub>2</sub>, pale-yellow, Mr = 279.33, monoclinic, space group P2(1)/c, a = 7.6540(13), b = 16.830(3), c = 11.568(2) Å, α=90.000, β= 99.578(2), γ= 90.000°, V = 1469.4(4) Å<sup>3</sup>, Z = 4, T = 293(2) K, 7868 reflections (2863 unique), 191 refined parameters, R1 = 0.0448 (I > 2σ(I)), wR2(F<sub>2</sub>) = 0.1091. The hydrogen atoms were refined as rigid groups. CCDC deposition number: 844259 (**3d**). These data can be obtained free of charge via [www.ccdc.cam.ac.uk/conts/retrieving.html](http://www.ccdc.cam.ac.uk/conts/retrieving.html) (or from the Cambridge Crystallographic Data Center, 12 Union Road, Cambridge CB21EZ, UK; fax: (+44)1223-336-033; or [deposit@ccdc.cam.ac.uk](mailto:deposit@ccdc.cam.ac.uk)).
